# Supplementary material for: Empanelment of health care facilities under Ayushman Bharat Pradhan Mantri Jan Arogya Yojana (AB PM-JAY) in India
Source: PLoS One. 2021 May 27;16(5):e0251814. doi: 10.1371/journal.pone.0251814 (PMC8158976; doi:10.1371/journal.pone.0251814)
Supplement: S1 File — (XLSX) [file pone.0251814.s007.xlsx]

## Sheet: Working Sheet 
State	Mode of Implementatition	District	Type of facility	Hospital Type	Specialities Empanelled	Upgarded
Andman and Nicobar	Trust	South Andamans	DH	Public
Andman and Nicobar	Trust	North And Middle Andaman	DH	Public
Andman and Nicobar	Trust	Nicobars	DH	Public
Andhra Pradesh	Trust	Chittoor	GH	Public
Andhra Pradesh	Trust	Visakhapatanam	MC	Public	General Medicine,Paediatric medical management,Neurosurgery,Urology,Emergency Room Packages,Paediatric cancer,Oral and Maxillofacial Surgery,Polytrauma,Plastic & reconstructive,Burns management,Medical Oncology,Surgical Oncology,Interventional Neuroradiology,Paediatric surgery,Orthopaedics,Obstetrics & Gynaecology,Otorhinolaryngology,General Surgery
Andhra Pradesh	Trust	Visakhapatanam	CHC	Public	Paediatric medical management,General Medicine,Emergency Room Packages,Obstetrics & Gynaecology,General Surgery
Andhra Pradesh	Trust	East Godavari	CHC	Public	Paediatric medical management,General Medicine,Emergency Room Packages,Obstetrics & Gynaecology
Andhra Pradesh	Trust	East Godavari	CHC	Public	Obstetrics & Gynaecology,General Surgery
Andhra Pradesh	Trust	East Godavari	CHC	Public	General Medicine,Obstetrics & Gynaecology
Andhra Pradesh	Trust	East Godavari	CHC	Public	Orthopaedics,Obstetrics & Gynaecology,Otorhinolaryngology,General Surgery
Andhra Pradesh	Trust	East Godavari	CHC	Public	General Medicine,Emergency Room Packages
Andhra Pradesh	Trust	East Godavari	CHC	Public	Paediatric medical management
Andhra Pradesh	Trust	East Godavari	CHC	Public	General Medicine,Emergency Room Packages,Obstetrics & Gynaecology
Andhra Pradesh	Trust	East Godavari	SDH	Public	General Medicine,Emergency Room Packages,Obstetrics & Gynaecology,General Surgery
Andhra Pradesh	Trust	Vizianagaram	CHC	Public	Paediatric medical management,Obstetrics & Gynaecology
Andhra Pradesh	Trust	East Godavari	CHC	Public	Paediatric medical management,Obstetrics & Gynaecology,General Surgery
Andhra Pradesh	Trust	East Godavari	CHC	Public	Paediatric medical management,Obstetrics & Gynaecology,General Surgery
Andhra Pradesh	Trust	Kurnool	CHC	Public	Paediatric medical management,Obstetrics & Gynaecology
Andhra Pradesh	Trust	East Godavari	CHC	Public	Paediatric medical management,Obstetrics & Gynaecology
Andhra Pradesh	Trust	East Godavari	CHC	Public	Paediatric medical management,General Medicine,Emergency Room Packages,Orthopaedics,Obstetrics & Gynaecology,Otorhinolaryngology,General Surgery
Andhra Pradesh	Trust	East Godavari	CHC	Public	General Medicine,Emergency Room Packages,Orthopaedics,Obstetrics & Gynaecology,Opthalmology,Otorhinolaryngology,General Surgery
Andhra Pradesh	Trust	East Godavari	CHC	Public	Paediatric medical management,General Medicine,Emergency Room Packages,Orthopaedics,Obstetrics & Gynaecology,General Surgery
Andhra Pradesh	Trust	Anantapur	CHC	Public	Obstetrics & Gynaecology
Andhra Pradesh	Trust	Anantapur	CHC	Public	Paediatric medical management
Andhra Pradesh	Trust	Spsr Nellore	SDH	Public	General Medicine,Emergency Room Packages,Polytrauma,Orthopaedics,Obstetrics & Gynaecology,General Surgery
Andhra Pradesh	Trust	Anantapur	SDH	Public	Orthopaedics,Obstetrics & Gynaecology,Opthalmology,General Surgery
Andhra Pradesh	Trust	Krishna	SDH	Public	Paediatric medical management,General Medicine,Emergency Room Packages,Obstetrics & Gynaecology,General Surgery
Andhra Pradesh	Trust	Krishna	CHC	Public	Paediatric medical management,General Medicine,Emergency Room Packages,Obstetrics & Gynaecology
Andhra Pradesh	Trust	Krishna	CHC	Public	Paediatric medical management,Obstetrics & Gynaecology
Andhra Pradesh	Trust	Krishna	CHC	Public	General Medicine,Orthopaedics,Otorhinolaryngology
Andhra Pradesh	Trust	Krishna	CHC	Public	Paediatric medical management
Andhra Pradesh	Trust	Krishna	CHC	Public	Paediatric medical management,Obstetrics & Gynaecology,Otorhinolaryngology
Andhra Pradesh	Trust	East Godavari	CHC	Public	General Medicine,Emergency Room Packages,Obstetrics & Gynaecology,General Surgery
Andhra Pradesh	Trust	East Godavari	CHC	Public	General Medicine,Emergency Room Packages,Obstetrics & Gynaecology
Andhra Pradesh	Trust	East Godavari	CHC	Public	Paediatric medical management,General Medicine,Emergency Room Packages,Orthopaedics,Opthalmology,General Surgery
Andhra Pradesh	Trust	Anantapur	SDH	Public	Paediatric medical management,Orthopaedics
Andhra Pradesh	Trust	Anantapur	CHC	Public	Paediatric medical management,General Medicine,Emergency Room Packages
Andhra Pradesh	Trust	Anantapur	DH	Public	Paediatric medical management,General Medicine,Emergency Room Packages,Orthopaedics,Obstetrics & Gynaecology,Opthalmology,Otorhinolaryngology
Andhra Pradesh	Trust	Prakasam	SDH	Public	General Medicine,Emergency Room Packages,Polytrauma,Orthopaedics,Obstetrics & Gynaecology,Opthalmology,Otorhinolaryngology,General Surgery
Andhra Pradesh	Trust	Chittoor	CHC	Public	General Medicine,Emergency Room Packages
Andhra Pradesh	Trust	Chittoor	CHC	Public	Obstetrics & Gynaecology
Andhra Pradesh	Trust	Chittoor	CHC	Public	Paediatric medical management,General Surgery
Andhra Pradesh	Trust	Chittoor	CHC	Public	Paediatric medical management,Oral and Maxillofacial Surgery,Obstetrics & Gynaecology
Andhra Pradesh	Trust	Chittoor	CHC	Public	Obstetrics & Gynaecology
Andhra Pradesh	Trust	Chittoor	CHC	Public	Paediatric medical management,General Medicine,Emergency Room Packages,Obstetrics & Gynaecology,Otorhinolaryngology
Andhra Pradesh	Trust	Chittoor	CHC	Public	Paediatric medical management,Obstetrics & Gynaecology
Andhra Pradesh	Trust	Chittoor	CHC	Public	General Medicine,Emergency Room Packages,Obstetrics & Gynaecology,General Surgery
Andhra Pradesh	Trust	Chittoor	CHC	Public	Paediatric medical management,Obstetrics & Gynaecology,Otorhinolaryngology
Andhra Pradesh	Trust	Chittoor	CHC	Public	Obstetrics & Gynaecology
Andhra Pradesh	Trust	Visakhapatanam	CHC	Public	Obstetrics & Gynaecology
Andhra Pradesh	Trust	Visakhapatanam	SDH	Public	Paediatric medical management,General Medicine,Emergency Room Packages,Obstetrics & Gynaecology,General Surgery
Andhra Pradesh	Trust	Visakhapatanam	SDH	Public	Paediatric medical management,General Medicine,Emergency Room Packages,General Surgery
Andhra Pradesh	Trust	Vizianagaram	CHC	Public	Paediatric medical management,General Medicine,Emergency Room Packages,Obstetrics & Gynaecology,General Surgery
Andhra Pradesh	Trust	Kurnool	CHC	Public	Paediatric medical management,General Medicine,Emergency Room Packages,Obstetrics & Gynaecology,General Surgery
Andhra Pradesh	Trust	Kurnool	CHC	Public	Paediatric medical management,Obstetrics & Gynaecology
Andhra Pradesh	Trust	Kurnool	CHC	Public	Paediatric medical management,General Medicine,Emergency Room Packages,Orthopaedics,Obstetrics & Gynaecology,Otorhinolaryngology,General Surgery
Andhra Pradesh	Trust	Y.S.R.	CHC	Public	Paediatric medical management,General Medicine,Emergency Room Packages,Opthalmology
Andhra Pradesh	Trust	Y.S.R.	CHC	Public	Paediatric medical management,Obstetrics & Gynaecology,General Surgery
Andhra Pradesh	Trust	West Godavari	CHC	Public	General Medicine,Emergency Room Packages,Orthopaedics
Andhra Pradesh	Trust	West Godavari	CHC	Public	Obstetrics & Gynaecology
Andhra Pradesh	Trust	West Godavari	CHC	Public	Paediatric medical management,Urology,Obstetrics & Gynaecology,Otorhinolaryngology,General Surgery
Andhra Pradesh	Trust	West Godavari	CHC	Public	General Medicine,Paediatric medical management,Neurosurgery,Emergency Room Packages,Polytrauma,Plastic & reconstructive,Burns management,Orthopaedics,Obstetrics & Gynaecology,General Surgery
Andhra Pradesh	Trust	West Godavari	CHC	Public	General Medicine,Emergency Room Packages,General Surgery
Andhra Pradesh	Trust	West Godavari	CHC	Public	Paediatric medical management,Obstetrics & Gynaecology
Andhra Pradesh	Trust	West Godavari	CHC	Public	Obstetrics & Gynaecology
Andhra Pradesh	Trust	West Godavari	CHC	Public	Paediatric medical management,General Medicine,Emergency Room Packages,General Surgery
Andhra Pradesh	Trust	West Godavari	CHC	Public	General Medicine,Emergency Room Packages,Orthopaedics,General Surgery
Andhra Pradesh	Trust	Vizianagaram	CHC	Public	Paediatric medical management,Urology,Obstetrics & Gynaecology
Andhra Pradesh	Trust	West Godavari	CHC	Public	General Medicine,Emergency Room Packages,Orthopaedics
Andhra Pradesh	Trust	West Godavari	CHC	Public	General Medicine,Emergency Room Packages,Obstetrics & Gynaecology
Andhra Pradesh	Trust	Vizianagaram	CHC	Public	Obstetrics & Gynaecology
Andhra Pradesh	Trust	Vizianagaram	CHC	Public	Paediatric medical management,Obstetrics & Gynaecology,General Surgery
Andhra Pradesh	Trust	Vizianagaram	CHC	Public	General Medicine,Paediatric medical management,Emergency Room Packages,Obstetrics & Gynaecology,General Surgery
Andhra Pradesh	Trust	Vizianagaram	CHC	Public	Paediatric medical management,General Medicine,Emergency Room Packages,Oral and Maxillofacial Surgery,Obstetrics & Gynaecology,General Surgery
Andhra Pradesh	Trust	Vizianagaram	CHC	Public	Paediatric medical management,General Medicine,Emergency Room Packages,Oral and Maxillofacial Surgery,Polytrauma,Orthopaedics,Obstetrics & Gynaecology,Otorhinolaryngology,General Surgery
Andhra Pradesh	Trust	Spsr Nellore	CHC	Public	Otorhinolaryngology,General Surgery
Andhra Pradesh	Trust	Anantapur	CHC	Public	General Medicine,Emergency Room Packages,Obstetrics & Gynaecology
Andhra Pradesh	Trust	Spsr Nellore	GH	Public	General Medicine,Paediatric medical management,Neurosurgery,Urology,Cardiology,Emergency Room Packages,Polytrauma,Plastic & reconstructive,Burns management,Paediatric surgery,Orthopaedics,Obstetrics & Gynaecology,Opthalmology,Otorhinolaryngology,General Surgery
Andhra Pradesh	Trust	Vizianagaram	GH	Public	Oral and Maxillofacial Surgery
Andhra Pradesh	Trust	Krishna	CHC	Public	Paediatric medical management,Obstetrics & Gynaecology
Andhra Pradesh	Trust	Y.S.R.	CHC	Public	Paediatric medical management
Andhra Pradesh	Trust	Y.S.R.	CHC	Public	Paediatric medical management,General Medicine,Emergency Room Packages,General Surgery
Andhra Pradesh	Trust	Prakasam	CHC	Public	Paediatric medical management,General Medicine,Emergency Room Packages,Obstetrics & Gynaecology,Opthalmology
Andhra Pradesh	Trust	Guntur	CHC	Public	Orthopaedics,Obstetrics & Gynaecology,General Surgery
Andhra Pradesh	Trust	Spsr Nellore	CHC	Public	Paediatric medical management
Andhra Pradesh	Trust	Spsr Nellore	CHC	Public	Obstetrics & Gynaecology
Andhra Pradesh	Trust	Spsr Nellore	CHC	Public	Paediatric medical management,Obstetrics & Gynaecology
Andhra Pradesh	Trust	Spsr Nellore	CHC	Public	General Medicine,Emergency Room Packages
Andhra Pradesh	Trust	Spsr Nellore	CHC	Public	General Medicine,Emergency Room Packages,Otorhinolaryngology,General Surgery
Andhra Pradesh	Trust	Spsr Nellore	CHC	Public	General Medicine,Emergency Room Packages,Obstetrics & Gynaecology
Andhra Pradesh	Trust	Spsr Nellore	CHC	Public	Paediatric medical management,General Medicine,Emergency Room Packages,Obstetrics & Gynaecology
Andhra Pradesh	Trust	Srikakulam	CHC	Public	General Surgery
Andhra Pradesh	Trust	Srikakulam	CHC	Public	Obstetrics & Gynaecology
Andhra Pradesh	Trust	Guntur	CHC	Public	Obstetrics & Gynaecology,General Surgery	NA
Andhra Pradesh	Trust	Guntur	CHC	Public	Paediatric medical management,Obstetrics & Gynaecology	NA
Andhra Pradesh	Trust	Guntur	CHC	Public	Paediatric medical management,Obstetrics & Gynaecology,General Surgery	NA
Andhra Pradesh	Trust	Guntur	CHC	Public	General Medicine,Emergency Room Packages,Orthopaedics,Obstetrics & Gynaecology,General Surgery	NA
Andhra Pradesh	Trust	Guntur	CHC	Public	Paediatric medical management,Obstetrics & Gynaecology	NA
Andhra Pradesh	Trust	Guntur	CHC	Public	Paediatric medical management,General Medicine,Emergency Room Packages,Obstetrics & Gynaecology	NA
Andhra Pradesh	Trust	Guntur	CHC	Public	General Medicine,Emergency Room Packages,Paediatric surgery,Obstetrics & Gynaecology,General Surgery	NA
Andhra Pradesh	Trust	Y.S.R.	GH	Public	General Medicine,Paediatric medical management,Neurosurgery,Urology,Cardiology,Emergency Room Packages,Polytrauma,Plastic & reconstructive,Burns management,Interventional Neuroradiology,Paediatric surgery,Orthopaedics,Obstetrics & Gynaecology,Opthalmology,Otorhinolaryngology,General Surgery	NA
Andhra Pradesh	Trust	Visakhapatanam	SH	Public	General Medicine,Emergency Room Packages	NA
Andhra Pradesh	Trust	Chittoor	SDH	Public	General Medicine,Paediatric medical management,Neurosurgery,Urology,Cardiology,Emergency Room Packages,Polytrauma,Plastic & reconstructive,Burns management,Paediatric surgery,Orthopaedics,Obstetrics & Gynaecology,Opthalmology,Otorhinolaryngology,General Surgery	NA
Andhra Pradesh	Trust	Chittoor	SDH	Public	General Medicine,Paediatric medical management,Neurosurgery,Urology,Cardiology,Emergency Room Packages,Polytrauma,Plastic & reconstructive,Burns management,Paediatric surgery,Orthopaedics,Obstetrics & Gynaecology,Opthalmology,Otorhinolaryngology,General Surgery	NA
Andhra Pradesh	Trust	East Godavari	SDH	Public	General Medicine,Paediatric medical management,Neurosurgery,Urology,Cardiology,Emergency Room Packages,Polytrauma,Plastic & reconstructive,Burns management,Paediatric surgery,Orthopaedics,Obstetrics & Gynaecology,Opthalmology,Otorhinolaryngology,General Surgery	NA
Andhra Pradesh	Trust	Guntur	SDH	Public	General Medicine,Paediatric medical management,Neurosurgery,Urology,Cardiology,Emergency Room Packages,Polytrauma,Plastic & reconstructive,Burns management,Paediatric surgery,Orthopaedics,Obstetrics & Gynaecology,Opthalmology,Otorhinolaryngology,General Surgery	NA
Andhra Pradesh	Trust	Kurnool	SDH	Public	General Medicine,Paediatric medical management,Neurosurgery,Urology,Cardiology,Emergency Room Packages,Polytrauma,Plastic & reconstructive,Burns management,Paediatric surgery,Orthopaedics,Obstetrics & Gynaecology,Opthalmology,Otorhinolaryngology,General Surgery	NA
Andhra Pradesh	Trust	Krishna	SDH	Public	General Medicine,Paediatric medical management,Neurosurgery,Urology,Cardiology,Emergency Room Packages,Polytrauma,Plastic & reconstructive,Burns management,Paediatric surgery,Orthopaedics,Obstetrics & Gynaecology,Opthalmology,Otorhinolaryngology,General Surgery	NA
Andhra Pradesh	Trust	Vizianagaram	SDH	Public	General Medicine,Paediatric medical management,Neurosurgery,Urology,Cardiology,Emergency Room Packages,Polytrauma,Plastic & reconstructive,Burns management,Paediatric surgery,Orthopaedics,Obstetrics & Gynaecology,Opthalmology,Otorhinolaryngology,General Surgery	NA
Andhra Pradesh	Trust	West Godavari	SDH	Public	General Medicine,Paediatric medical management,Neurosurgery,Urology,Cardiology,Emergency Room Packages,Polytrauma,Plastic & reconstructive,Burns management,Paediatric surgery,Orthopaedics,Obstetrics & Gynaecology,Opthalmology,Otorhinolaryngology,General Surgery	NA
Andhra Pradesh	Trust	Chittoor	DH	Public	General Medicine,Paediatric medical management,Neurosurgery,Urology,Cardiology,Emergency Room Packages,Polytrauma,Plastic & reconstructive,Burns management,Paediatric surgery,Orthopaedics,Obstetrics & Gynaecology,Opthalmology,Otorhinolaryngology,General Surgery	NA
Andhra Pradesh	Trust	East Godavari	DH	Public	General Medicine,Paediatric medical management,Neurosurgery,Urology,Cardiology,Emergency Room Packages,Polytrauma,Plastic & reconstructive,Burns management,Interventional Neuroradiology,Paediatric surgery,Orthopaedics,Obstetrics & Gynaecology,Opthalmology,Otorhinolaryngology,General Surgery	NA
Andhra Pradesh	Trust	Guntur	DH	Public	General Medicine,Paediatric medical management,Neurosurgery,Urology,Cardiology,Emergency Room Packages,Polytrauma,Plastic & reconstructive,Burns management,Paediatric surgery,Orthopaedics,Obstetrics & Gynaecology,Opthalmology,Otorhinolaryngology,General Surgery	NA
Andhra Pradesh	Trust	Kurnool	DH	Public	General Medicine,Paediatric medical management,Neurosurgery,Urology,Cardiology,Emergency Room Packages,Polytrauma,Plastic & reconstructive,Burns management,Paediatric surgery,Orthopaedics,Obstetrics & Gynaecology,Opthalmology,Otorhinolaryngology,General Surgery	NA
Andhra Pradesh	Trust	Krishna	DH	Public	General Medicine,Paediatric medical management,Neurosurgery,Urology,Cardiology,Emergency Room Packages,Polytrauma,Plastic & reconstructive,Burns management,Paediatric surgery,Orthopaedics,Obstetrics & Gynaecology,Opthalmology,Otorhinolaryngology,General Surgery	NA
Andhra Pradesh	Trust	Prakasam	MC	Public	General Medicine,Paediatric medical management,Neurosurgery,Urology,Cardiology,Emergency Room Packages,Polytrauma,Plastic & reconstructive,Burns management,Interventional Neuroradiology,Paediatric surgery,Orthopaedics,Obstetrics & Gynaecology,Opthalmology,Otorhinolaryngology,General Surgery	NA
Andhra Pradesh	Trust	Vizianagaram	DH	Public	General Medicine,Paediatric medical management,Neurosurgery,Urology,Cardiology,Emergency Room Packages,Polytrauma,Plastic & reconstructive,Burns management,Paediatric surgery,Orthopaedics,Obstetrics & Gynaecology,Opthalmology,Otorhinolaryngology,General Surgery	NA
Andhra Pradesh	Trust	Visakhapatanam	DH	Public	General Medicine,Paediatric medical management,Neurosurgery,Urology,Cardiology,Emergency Room Packages,Paediatric cancer,Polytrauma,Plastic & reconstructive,Burns management,Radiation Oncology,Medical Oncology,Surgical Oncology,Interventional Neuroradiology,Paediatric surgery,Cardio-thoracic & Vascular surgery,Orthopaedics,Obstetrics & Gynaecology,Opthalmology,Otorhinolaryngology,General Surgery	NA
Andhra Pradesh	Trust	Y.S.R.	SDH	Public	General Medicine,Paediatric medical management,Neurosurgery,Urology,Cardiology,Emergency Room Packages,Polytrauma,Plastic & reconstructive,Burns management,Paediatric surgery,Orthopaedics,Obstetrics & Gynaecology,Opthalmology,Otorhinolaryngology,General Surgery	NA
Andhra Pradesh	Trust	Y.S.R.	DH	Public	General Medicine,Paediatric medical management,Neurosurgery,Urology,Cardiology,Emergency Room Packages,Polytrauma,Plastic & reconstructive,Burns management,Paediatric surgery,Orthopaedics,Obstetrics & Gynaecology,Opthalmology,Otorhinolaryngology,General Surgery	NA
Andhra Pradesh	Trust	Krishna	SDH	Public	General Medicine,Paediatric medical management,Neurosurgery,Urology,Cardiology,Emergency Room Packages,Polytrauma,Plastic & reconstructive,Burns management,Paediatric surgery,Orthopaedics,Obstetrics & Gynaecology,Opthalmology,Otorhinolaryngology,General Surgery	NA
Andhra Pradesh	Trust	Spsr Nellore	SDH	Public	General Medicine,Paediatric medical management,Neurosurgery,Urology,Cardiology,Emergency Room Packages,Polytrauma,Plastic & reconstructive,Burns management,Paediatric surgery,Orthopaedics,Obstetrics & Gynaecology,Opthalmology,Otorhinolaryngology,General Surgery	NA
Andhra Pradesh	Trust	Spsr Nellore	SDH	Public	General Medicine,Paediatric medical management,Neurosurgery,Urology,Cardiology,Emergency Room Packages,Polytrauma,Plastic & reconstructive,Burns management,Paediatric surgery,Orthopaedics,Obstetrics & Gynaecology,Opthalmology,Otorhinolaryngology,General Surgery	NA
Andhra Pradesh	Trust	Guntur	SDH	Public	General Medicine,Paediatric medical management,Neurosurgery,Urology,Cardiology,Emergency Room Packages,Polytrauma,Plastic & reconstructive,Burns management,Paediatric surgery,Orthopaedics,Obstetrics & Gynaecology,Opthalmology,Otorhinolaryngology,General Surgery	NA
Andhra Pradesh	Trust	Prakasam	SDH	Public	General Medicine,Paediatric medical management,Neurosurgery,Urology,Cardiology,Emergency Room Packages,Polytrauma,Plastic & reconstructive,Burns management,Paediatric surgery,Orthopaedics,Obstetrics & Gynaecology,Opthalmology,Otorhinolaryngology,General Surgery	NA
Andhra Pradesh	Trust	Srikakulam	SDH	Public	General Medicine,Paediatric medical management,Neurosurgery,Urology,Cardiology,Emergency Room Packages,Polytrauma,Plastic & reconstructive,Burns management,Paediatric surgery,Orthopaedics,Obstetrics & Gynaecology,Opthalmology,Otorhinolaryngology,General Surgery	NA
Andhra Pradesh	Trust	Srikakulam	GH	Public	General Medicine,Paediatric medical management,Neurosurgery,Urology,Cardiology,Emergency Room Packages,Paediatric cancer,Polytrauma,Plastic & reconstructive,Burns management,Radiation Oncology,Medical Oncology,Surgical Oncology,Interventional Neuroradiology,Paediatric surgery,Cardio-thoracic & Vascular surgery,Orthopaedics,Obstetrics & Gynaecology,Opthalmology,Otorhinolaryngology,General Surgery	NA
Andhra Pradesh	Trust	Visakhapatanam	SDH	Public	General Medicine,Paediatric medical management,Neurosurgery,Urology,Cardiology,Emergency Room Packages,Polytrauma,Plastic & reconstructive,Burns management,Paediatric surgery,Orthopaedics,Obstetrics & Gynaecology,Opthalmology,Otorhinolaryngology,General Surgery	NA
Andhra Pradesh	Trust	Anantapur	SDH	Public	General Medicine,Paediatric medical management,Neurosurgery,Urology,Cardiology,Emergency Room Packages,Polytrauma,Plastic & reconstructive,Burns management,Paediatric surgery,Orthopaedics,Obstetrics & Gynaecology,Opthalmology,Otorhinolaryngology,General Surgery	NA
Andhra Pradesh	Trust	Anantapur	SDH	Public	General Medicine,Paediatric medical management,Neurosurgery,Urology,Cardiology,Emergency Room Packages,Polytrauma,Plastic & reconstructive,Burns management,Paediatric surgery,Orthopaedics,Obstetrics & Gynaecology,Opthalmology,Otorhinolaryngology,General Surgery	NA
Andhra Pradesh	Trust	Chittoor	SDH	Public	General Medicine,Paediatric medical management,Neurosurgery,Urology,Cardiology,Emergency Room Packages,Polytrauma,Plastic & reconstructive,Burns management,Paediatric surgery,Orthopaedics,Obstetrics & Gynaecology,Opthalmology,Otorhinolaryngology,General Surgery	NA
Andhra Pradesh	Trust	Chittoor	SDH	Public	General Medicine,Paediatric medical management,Neurosurgery,Urology,Cardiology,Emergency Room Packages,Polytrauma,Plastic & reconstructive,Burns management,Paediatric surgery,Orthopaedics,Obstetrics & Gynaecology,Opthalmology,Otorhinolaryngology,General Surgery	NA
Andhra Pradesh	Trust	West Godavari	SDH	Public	General Medicine,Paediatric medical management,Neurosurgery,Urology,Cardiology,Emergency Room Packages,Polytrauma,Plastic & reconstructive,Burns management,Paediatric surgery,Orthopaedics,Obstetrics & Gynaecology,Opthalmology,Otorhinolaryngology,General Surgery	NA
Andhra Pradesh	Trust	West Godavari	CHC	Public	General Medicine,Paediatric medical management,Neurosurgery,Urology,Cardiology,Emergency Room Packages,Polytrauma,Plastic & reconstructive,Burns management,Paediatric surgery,Orthopaedics,Obstetrics & Gynaecology,Opthalmology,Otorhinolaryngology,General Surgery	NA
Andhra Pradesh	Trust	Kurnool	GH	Public	General Medicine,Paediatric medical management,Neurosurgery,Urology,Cardiology,Emergency Room Packages,Paediatric cancer,Polytrauma,Plastic & reconstructive,Burns management,Radiation Oncology,Medical Oncology,Surgical Oncology,Interventional Neuroradiology,Paediatric surgery,Cardio-thoracic & Vascular surgery,Orthopaedics,Obstetrics & Gynaecology,Opthalmology,Otorhinolaryngology,General Surgery	NA
Andhra Pradesh	Trust	West Godavari	DH	Public	General Medicine,Paediatric medical management,Neurosurgery,Urology,Cardiology,Emergency Room Packages,Polytrauma,Plastic & reconstructive,Burns management,Interventional Neuroradiology,Paediatric surgery,Orthopaedics,Obstetrics & Gynaecology,Opthalmology,Otorhinolaryngology,General Surgery	NA
Andhra Pradesh	Trust	Anantapur	GH	Public	General Medicine,Paediatric medical management,Neurosurgery,Urology,Cardiology,Emergency Room Packages,Polytrauma,Plastic & reconstructive,Burns management,Radiation Oncology,Medical Oncology,Surgical Oncology,Interventional Neuroradiology,Paediatric surgery,Orthopaedics,Obstetrics & Gynaecology,Opthalmology,Otorhinolaryngology,General Surgery	NA
Andhra Pradesh	Trust	Visakhapatanam	SH	Public	General Medicine,Paediatric medical management,Neurosurgery,Urology,Cardiology,Emergency Room Packages,Paediatric cancer,Polytrauma,Plastic & reconstructive,Burns management,Radiation Oncology,Medical Oncology,Surgical Oncology,Interventional Neuroradiology,Paediatric surgery,Cardio-thoracic & Vascular surgery,Orthopaedics,Obstetrics & Gynaecology,Opthalmology,Otorhinolaryngology,General Surgery	NA
Andhra Pradesh	Trust	Chittoor	CHC	Public	Paediatric medical management	NA
Andhra Pradesh	Trust	Spsr Nellore	CHC	Public	Paediatric medical management,General Medicine,Emergency Room Packages,Obstetrics & Gynaecology,General Surgery	NA
Andhra Pradesh	Trust	Chittoor	SDH	Public	Paediatric medical management,General Medicine,Emergency Room Packages,Orthopaedics,Obstetrics & Gynaecology,Opthalmology,Otorhinolaryngology,General Surgery	NA
Andhra Pradesh	Trust	Prakasam	CHC	Public	Paediatric medical management	NA
Andhra Pradesh	Trust	Srikakulam	CHC	Public	General Medicine,Emergency Room Packages,Obstetrics & Gynaecology,Opthalmology	NA
Andhra Pradesh	Trust	Srikakulam	CHC	Public	Obstetrics & Gynaecology	NA
Andhra Pradesh	Trust	Srikakulam	CHC	Public	Obstetrics & Gynaecology	NA
Andhra Pradesh	Trust	Srikakulam	CHC	Public	Paediatric medical management,General Medicine,Emergency Room Packages	NA
Andhra Pradesh	Trust	Srikakulam	CHC	Public	General Medicine,Emergency Room Packages,Orthopaedics,Obstetrics & Gynaecology,General Surgery	NA
Andhra Pradesh	Trust	Srikakulam	CHC	Public	Paediatric medical management,Otorhinolaryngology	NA
Andhra Pradesh	Trust	Srikakulam	CHC	Public	General Medicine,Emergency Room Packages,Obstetrics & Gynaecology,General Surgery	NA
Andhra Pradesh	Trust	Anantapur	CHC	Public	Paediatric medical management,Obstetrics & Gynaecology	NA
Andhra Pradesh	Trust	Visakhapatanam	CHC	Public	Paediatric medical management,General Medicine,Emergency Room Packages	NA
Andhra Pradesh	Trust	Visakhapatanam	CHC	Public	Obstetrics & Gynaecology	NA
Andhra Pradesh	Trust	Prakasam	CHC	Public	General Surgery	NA
Andhra Pradesh	Trust	Prakasam	CHC	Public	Paediatric medical management,Obstetrics & Gynaecology	NA
Andhra Pradesh	Trust	Prakasam	CHC	Public	Paediatric medical management	NA
Andhra Pradesh	Trust	Y.S.R.	CHC	Public	General Medicine,Orthopaedics	NA
Andhra Pradesh	Trust	Y.S.R.	CHC	Public	Paediatric medical management,General Medicine,Emergency Room Packages,Obstetrics & Gynaecology,General Surgery	NA
Andhra Pradesh	Trust	Y.S.R.	CHC	Public	-NA-	NA
Andhra Pradesh	Trust	Y.S.R.	CHC	Public	Obstetrics & Gynaecology	NA
Andhra Pradesh	Trust	Y.S.R.	CHC	Public	Paediatric medical management	NA
Andhra Pradesh	Trust	Y.S.R.	CHC	Public	Paediatric medical management,Obstetrics & Gynaecology	NA
Andhra Pradesh	Trust	East Godavari	CHC	Public	Obstetrics & Gynaecology,General Surgery	NA
Andhra Pradesh	Trust	East Godavari	CHC	Public	General Medicine,Emergency Room Packages,Obstetrics & Gynaecology	NA
Andhra Pradesh	Trust	Kurnool	CHC	Public	Obstetrics & Gynaecology	NA
Andhra Pradesh	Trust	Kurnool	CHC	Public	Paediatric medical management	NA
Andhra Pradesh	Trust	Kurnool	CHC	Public	General Medicine,Emergency Room Packages	NA
Andhra Pradesh	Trust	Kurnool	CHC	Public	Paediatric medical management	NA
Andhra Pradesh	Trust	Kurnool	CHC	Public	Obstetrics & Gynaecology	NA
Andhra Pradesh	Trust	Spsr Nellore	CHC	Public	Obstetrics & Gynaecology,Otorhinolaryngology	NA
Andhra Pradesh	Trust	Guntur	CHC	Public	Obstetrics & Gynaecology	NA
Andhra Pradesh	Trust	Guntur	CHC	Public	Paediatric medical management,General Medicine,Emergency Room Packages,Obstetrics & Gynaecology	NA
Andhra Pradesh	Trust	Guntur	CHC	Public	Paediatric medical management	NA
Andhra Pradesh	Trust	Guntur	CHC	Public	Paediatric medical management,Obstetrics & Gynaecology,Otorhinolaryngology	NA
Andhra Pradesh	Trust	Guntur	CHC	Public	Paediatric medical management,Obstetrics & Gynaecology	NA
Andhra Pradesh	Trust	Guntur	CHC	Public	General Medicine,Emergency Room Packages	NA
Andhra Pradesh	Trust	Krishna	CHC	Public	Paediatric medical management,Oral and Maxillofacial Surgery,Obstetrics & Gynaecology	NA
Andhra Pradesh	Trust	Krishna	CHC	Public	Orthopaedics,Opthalmology	NA
Andhra Pradesh	Trust	Krishna	CHC	Public	Paediatric medical management,Obstetrics & Gynaecology	NA
Andhra Pradesh	Trust	Prakasam	CHC	Public	-NA-	NA
Andhra Pradesh	Trust	Y.S.R.	CHC	Public	Obstetrics & Gynaecology	NA
Andhra Pradesh	Trust	Guntur	CHC	Public	Paediatric medical management	NA
Andhra Pradesh	Trust	Kurnool	CHC	Public	Paediatric medical management,Obstetrics & Gynaecology,Opthalmology	NA
Andhra Pradesh	Trust	Visakhapatanam	CHC	Public	Paediatric medical management,General Medicine,Emergency Room Packages,Obstetrics & Gynaecology	NA
Andhra Pradesh	Trust	Anantapur	CHC	Public	Obstetrics & Gynaecology	NA
Andhra Pradesh	Trust	Guntur	CHC	Public	Paediatric medical management,General Medicine,Emergency Room Packages	NA
Andhra Pradesh	Trust	Kurnool	SH	Public	Opthalmology	NA
Andhra Pradesh	Trust	Anantapur	CHC	Public	-NA-	NA
Andhra Pradesh	Trust	Srikakulam	CHC	Public	General Medicine,Emergency Room Packages,General Surgery	NA
Andhra Pradesh	Trust	Srikakulam	CHC	Public	Obstetrics & Gynaecology,General Surgery	NA
Andhra Pradesh	Trust	Srikakulam	CHC	Public	Orthopaedics,Obstetrics & Gynaecology,General Surgery	NA
Andhra Pradesh	Trust	Visakhapatanam	SH	Public	Radiation Oncology,Medical Oncology,Surgical Oncology	NA
Andhra Pradesh	Trust	Visakhapatanam	SDH	Public	Paediatric medical management,General Medicine,Emergency Room Packages,Polytrauma,Orthopaedics,Obstetrics & Gynaecology,Otorhinolaryngology,General Surgery	NA
Andhra Pradesh	Trust	Kurnool	SDH	Public	Paediatric medical management,General Medicine,Emergency Room Packages,Polytrauma,Orthopaedics,Obstetrics & Gynaecology,Opthalmology,Otorhinolaryngology,General Surgery	NA
Andhra Pradesh	Trust	Prakasam	SDH	Public	Paediatric medical management,General Medicine,Emergency Room Packages,Polytrauma,Orthopaedics,Obstetrics & Gynaecology,Otorhinolaryngology,General Surgery	NA
Andhra Pradesh	Trust	Prakasam	SDH	Public	Paediatric medical management,General Medicine,Emergency Room Packages,Polytrauma,Orthopaedics,Obstetrics & Gynaecology,Otorhinolaryngology,General Surgery	NA
Andhra Pradesh	Trust	Prakasam	SDH	Public	Paediatric medical management,General Medicine,Emergency Room Packages,Polytrauma,Orthopaedics,Obstetrics & Gynaecology,Otorhinolaryngology,General Surgery	NA
Andhra Pradesh	Trust	Prakasam	SDH	Public	Paediatric medical management,General Medicine,Emergency Room Packages,Polytrauma,Orthopaedics,Obstetrics & Gynaecology,Otorhinolaryngology,General Surgery	NA
Andhra Pradesh	Trust	Prakasam	SDH	Public	Paediatric medical management,General Medicine,Emergency Room Packages,Polytrauma,Orthopaedics,Obstetrics & Gynaecology,Otorhinolaryngology,General Surgery	NA
Andhra Pradesh	Trust	Guntur	SH	Public	General Medicine,Plastic & reconstructive,Burns management	NA
Andhra Pradesh	Trust	Visakhapatanam	CHC	Public	Paediatric medical management,General Medicine,Emergency Room Packages,Polytrauma,Orthopaedics,Obstetrics & Gynaecology,Otorhinolaryngology,General Surgery	NA
Andhra Pradesh	Trust	Anantapur	SDH	Public	Paediatric medical management,General Medicine,Emergency Room Packages,Polytrauma,Orthopaedics,Obstetrics & Gynaecology,Otorhinolaryngology,General Surgery	NA
Andhra Pradesh	Trust	Srikakulam	CHC	Public	Paediatric medical management,General Medicine,Emergency Room Packages,Polytrauma,Orthopaedics,Obstetrics & Gynaecology,Otorhinolaryngology,General Surgery	NA
Andhra Pradesh	Trust	Srikakulam	CHC	Public	Paediatric medical management,General Medicine,Emergency Room Packages,Polytrauma,Orthopaedics,Obstetrics & Gynaecology,Otorhinolaryngology,General Surgery	NA
Andhra Pradesh	Trust	Srikakulam	CHC	Public	Paediatric medical management,General Medicine,Emergency Room Packages,Polytrauma,Orthopaedics,Obstetrics & Gynaecology,Otorhinolaryngology,General Surgery	NA
Andhra Pradesh	Trust	Srikakulam	SDH	Public	General Medicine,Urology,Paediatric medical management,Emergency Room Packages,Polytrauma,Orthopaedics,Obstetrics & Gynaecology,Otorhinolaryngology,General Surgery	NA
Andhra Pradesh	Trust	Srikakulam	SDH	Public	Paediatric medical management,General Medicine,Emergency Room Packages,Polytrauma,Orthopaedics,Obstetrics & Gynaecology,Otorhinolaryngology,General Surgery	NA
Andhra Pradesh	Trust	Spsr Nellore	W&C	Public	Paediatric medical management,General Medicine,Emergency Room Packages,Polytrauma,Orthopaedics,Obstetrics & Gynaecology,Otorhinolaryngology,General Surgery	NA
Andhra Pradesh	Trust	Krishna	SDH	Public	Paediatric medical management,General Medicine,Emergency Room Packages,Polytrauma,Orthopaedics,Obstetrics & Gynaecology,Otorhinolaryngology,General Surgery	NA
Andhra Pradesh	Trust	Chittoor	MC	Public	General Medicine,Paediatric medical management,Neurosurgery,Urology,Cardiology,Emergency Room Packages,Polytrauma,Plastic & reconstructive,Burns management,Radiation Oncology,Medical Oncology,Surgical Oncology,Interventional Neuroradiology,Cardio-thoracic & Vascular surgery,Obstetrics & Gynaecology,Opthalmology,Otorhinolaryngology,General Surgery	NA
Andhra Pradesh	Trust	Visakhapatanam	SH	Public	Plastic & reconstructive,Burns management,Opthalmology	NA
Andhra Pradesh	Trust	Krishna	SDH	Public	Paediatric medical management,General Medicine,Emergency Room Packages,Polytrauma,Orthopaedics,Obstetrics & Gynaecology,Otorhinolaryngology,General Surgery	NA
Andhra Pradesh	Trust	East Godavari	SDH	Public	Paediatric medical management,General Medicine,Emergency Room Packages,Polytrauma,Orthopaedics,Obstetrics & Gynaecology,Otorhinolaryngology,General Surgery	NA
Andhra Pradesh	Trust	East Godavari	SDH	Public	Paediatric medical management,General Medicine,Emergency Room Packages,Polytrauma,Orthopaedics,Obstetrics & Gynaecology,Otorhinolaryngology,General Surgery	NA
Andhra Pradesh	Trust	East Godavari	SDH	Public	Paediatric medical management,General Medicine,Emergency Room Packages,Polytrauma,Orthopaedics,Obstetrics & Gynaecology,Otorhinolaryngology,General Surgery	NA
Andhra Pradesh	Trust	Vizianagaram	SDH	Public	Paediatric medical management,General Medicine,Emergency Room Packages,Polytrauma,Orthopaedics,Obstetrics & Gynaecology,Otorhinolaryngology,General Surgery	NA
Andhra Pradesh	Trust	Vizianagaram	SDH	Public	Paediatric medical management,General Medicine,Emergency Room Packages,Polytrauma,Orthopaedics,Obstetrics & Gynaecology,Otorhinolaryngology,General Surgery	NA
Andhra Pradesh	Trust	Kurnool	CHC	Public	Paediatric medical management,General Medicine,Emergency Room Packages,Polytrauma,Orthopaedics,Obstetrics & Gynaecology,Otorhinolaryngology,General Surgery	NA
Andhra Pradesh	Trust	West Godavari	SDH	Public	Paediatric medical management,General Medicine,Emergency Room Packages,Polytrauma,Orthopaedics,Obstetrics & Gynaecology,Otorhinolaryngology,General Surgery	NA
Andhra Pradesh	Trust	Chittoor	CHC	Public	Paediatric medical management,General Medicine,Emergency Room Packages,Polytrauma,Orthopaedics,Obstetrics & Gynaecology,Otorhinolaryngology,General Surgery	NA
Andhra Pradesh	Trust	East Godavari	SDH	Public	Paediatric medical management,General Medicine,Emergency Room Packages,Polytrauma,Orthopaedics,Obstetrics & Gynaecology,Otorhinolaryngology,General Surgery	NA
Andhra Pradesh	Trust	East Godavari	SDH	Public	Paediatric medical management,General Medicine,Emergency Room Packages,Polytrauma,Orthopaedics,Obstetrics & Gynaecology,Otorhinolaryngology,General Surgery	NA
Andhra Pradesh	Trust	Chittoor	SDH	Public	Paediatric medical management,General Medicine,Emergency Room Packages,Polytrauma,Orthopaedics,Obstetrics & Gynaecology,Otorhinolaryngology,General Surgery	NA
Andhra Pradesh	Trust	Visakhapatanam	W&C	Public	Paediatric medical management,Obstetrics & Gynaecology	NA
Andhra Pradesh	Trust	Guntur	GH	Public	General Medicine,Paediatric medical management,Neurosurgery,Urology,Cardiology,Emergency Room Packages,Paediatric cancer,Polytrauma,Plastic & reconstructive,Burns management,Radiation Oncology,Medical Oncology,Surgical Oncology,Interventional Neuroradiology,Paediatric surgery,Cardio-thoracic & Vascular surgery,Orthopaedics,Obstetrics & Gynaecology,Opthalmology,Otorhinolaryngology,General Surgery	NA
Andhra Pradesh	Trust	East Godavari	GH	Public	General Medicine,Paediatric medical management,Neurosurgery,Urology,Cardiology,Emergency Room Packages,Paediatric cancer,Polytrauma,Plastic & reconstructive,Burns management,Radiation Oncology,Medical Oncology,Surgical Oncology,Interventional Neuroradiology,Paediatric surgery,Cardio-thoracic & Vascular surgery,Orthopaedics,Obstetrics & Gynaecology,Opthalmology,Otorhinolaryngology,General Surgery	NA
Andhra Pradesh	Trust	Krishna	GH	Public	General Medicine,Paediatric medical management,Neurosurgery,Urology,Cardiology,Emergency Room Packages,Paediatric cancer,Polytrauma,Plastic & reconstructive,Burns management,Radiation Oncology,Medical Oncology,Surgical Oncology,Interventional Neuroradiology,Paediatric surgery,Cardio-thoracic & Vascular surgery,Orthopaedics,Obstetrics & Gynaecology,Opthalmology,Otorhinolaryngology,General Surgery	NA
Andhra Pradesh	Trust	Chittoor	W&C	Public	General Medicine,Paediatric medical management,Neurosurgery,Urology,Cardiology,Emergency Room Packages,Paediatric cancer,Polytrauma,Plastic & reconstructive,Burns management,Radiation Oncology,Medical Oncology,Surgical Oncology,Interventional Neuroradiology,Paediatric surgery,Cardio-thoracic & Vascular surgery,Orthopaedics,Obstetrics & Gynaecology,Opthalmology,Otorhinolaryngology,General Surgery	NA
Andhra Pradesh	Trust	Chittoor	SH	Public	General Medicine,Emergency Room Packages,Polytrauma,Orthopaedics	NA
Andhra Pradesh	Trust	Outside State		Private (For Profit)	Cardiology,Cardio-thoracic & Vascular surgery	NA
Andhra Pradesh	Trust	East Godavari		Private (For Profit)	General Medicine,Paediatric medical management,Neurosurgery,Urology,Cardiology,Emergency Room Packages,Polytrauma,Plastic & reconstructive,Burns management,Interventional Neuroradiology,Paediatric surgery,Cardio-thoracic & Vascular surgery,Orthopaedics,Obstetrics & Gynaecology,Opthalmology,Otorhinolaryngology,General Surgery	NA
Andhra Pradesh	Trust	Visakhapatanam		Private (For Profit)	Radiation Oncology,Medical Oncology,Surgical Oncology	NA
Andhra Pradesh	Trust	Vizianagaram		Private (For Profit)	General Medicine,Paediatric medical management,Neurosurgery,Urology,Cardiology,Emergency Room Packages,Polytrauma,Plastic & reconstructive,Burns management,Interventional Neuroradiology,Paediatric surgery,Orthopaedics,Obstetrics & Gynaecology,Opthalmology,Otorhinolaryngology,General Surgery	NA
Andhra Pradesh	Trust	Krishna		Private (For Profit)	General Medicine,Paediatric medical management,Neurosurgery,Urology,Emergency Room Packages,Polytrauma,Plastic & reconstructive,Burns management,Radiation Oncology,Medical Oncology,Surgical Oncology,Interventional Neuroradiology,Paediatric surgery,Orthopaedics,Obstetrics & Gynaecology,Otorhinolaryngology,General Surgery	NA
Andhra Pradesh	Trust	East Godavari		Private (For Profit)	General Medicine,Paediatric medical management,Neurosurgery,Cardiology,Emergency Room Packages,Polytrauma,Interventional Neuroradiology,Urology,Cardio-thoracic & Vascular surgery,Orthopaedics,Otorhinolaryngology,General Surgery	NA
Andhra Pradesh	Trust	Chittoor		Private (For Profit)	Polytrauma,Urology,Paediatric surgery,Orthopaedics,Obstetrics & Gynaecology,General Surgery	NA
Andhra Pradesh	Trust	Kurnool		Private (For Profit)	General Medicine,Cardiology,Paediatric medical management,Emergency Room Packages,Polytrauma,Plastic & reconstructive,Burns management,Neurosurgery,Interventional Neuroradiology,Urology,Paediatric surgery,Orthopaedics,Opthalmology,Otorhinolaryngology,General Surgery	NA
Andhra Pradesh	Trust	Guntur		Private (For Profit)	General Medicine,Paediatric medical management,Neurosurgery,Urology,Emergency Room Packages,Polytrauma,Plastic & reconstructive,Burns management,Interventional Neuroradiology,Paediatric surgery,Orthopaedics,Obstetrics & Gynaecology,Opthalmology,Otorhinolaryngology,General Surgery	NA
Andhra Pradesh	Trust	East Godavari		Private (For Profit)	Radiation Oncology,Medical Oncology,Surgical Oncology	NA
Andhra Pradesh	Trust	Krishna		Private (For Profit)	General Medicine,Paediatric medical management,Neurosurgery,Urology,Emergency Room Packages,Polytrauma,Plastic & reconstructive,Burns management,Interventional Neuroradiology,Paediatric surgery,Orthopaedics,Obstetrics & Gynaecology,Opthalmology,General Surgery	NA
Andhra Pradesh	Trust	Spsr Nellore		Private (For Profit)	General Medicine,Paediatric medical management,Neurosurgery,Emergency Room Packages,Polytrauma,Interventional Neuroradiology,Urology,Paediatric surgery,Orthopaedics,Obstetrics & Gynaecology,Otorhinolaryngology,General Surgery	NA
Andhra Pradesh	Trust	Krishna		Private (For Profit)	Polytrauma,Plastic & reconstructive,Burns management,Neurosurgery,Interventional Neuroradiology,Urology,Orthopaedics,Obstetrics & Gynaecology,General Surgery	NA
Andhra Pradesh	Trust	Visakhapatanam		Private (For Profit)	General Medicine,Urology,Cardiology,Paediatric medical management,Emergency Room Packages,Polytrauma,Plastic & reconstructive,Burns management,Neurosurgery,Interventional Neuroradiology,Paediatric surgery,Cardio-thoracic & Vascular surgery,Orthopaedics,Obstetrics & Gynaecology,Otorhinolaryngology,General Surgery	NA
Andhra Pradesh	Trust	Visakhapatanam		Private (For Profit)	General Medicine,Paediatric medical management,Neurosurgery,Urology,Emergency Room Packages,Paediatric cancer,Polytrauma,Plastic & reconstructive,Burns management,Interventional Neuroradiology,Paediatric surgery,Orthopaedics,Obstetrics & Gynaecology,Opthalmology,Otorhinolaryngology,General Surgery	NA
Andhra Pradesh	Trust	Visakhapatanam		Private (For Profit)	General Medicine,Paediatric medical management,Neurosurgery,Urology,Emergency Room Packages,Polytrauma,Plastic & reconstructive,Burns management,Interventional Neuroradiology,Paediatric surgery,Orthopaedics,Obstetrics & Gynaecology,Otorhinolaryngology,General Surgery	NA
Andhra Pradesh	Trust	Spsr Nellore		Private (For Profit)	Radiation Oncology,Medical Oncology,Surgical Oncology	NA
Andhra Pradesh	Trust	Vizianagaram		Private (For Profit)	General Medicine,Paediatric medical management,Neurosurgery,Urology,Emergency Room Packages,Polytrauma,Plastic & reconstructive,Burns management,Interventional Neuroradiology,Orthopaedics,Obstetrics & Gynaecology,Otorhinolaryngology,General Surgery	NA
Andhra Pradesh	Trust	Krishna		Private (For Profit)	General Medicine,Paediatric medical management,Neurosurgery,Urology,Cardiology,Emergency Room Packages,Polytrauma,Plastic & reconstructive,Burns management,Interventional Neuroradiology,Paediatric surgery,Cardio-thoracic & Vascular surgery,Orthopaedics,Obstetrics & Gynaecology,Opthalmology,Otorhinolaryngology,General Surgery	NA
Andhra Pradesh	Trust	East Godavari		Private (For Profit)	General Medicine,Urology,Polytrauma,Plastic & reconstructive,Burns management,Neurosurgery,Interventional Neuroradiology,Paediatric surgery,Orthopaedics,Opthalmology,Otorhinolaryngology,General Surgery	NA
Andhra Pradesh	Trust	Spsr Nellore		Private (For Profit)	General Medicine,Urology,Emergency Room Packages,Polytrauma,Plastic & reconstructive,Burns management,Orthopaedics,Obstetrics & Gynaecology,Opthalmology,General Surgery	NA
Andhra Pradesh	Trust	Y.S.R.		Private (For Profit)	Paediatric medical management,General Medicine,Emergency Room Packages,Polytrauma,Neurosurgery,Interventional Neuroradiology,Urology,Paediatric surgery,Orthopaedics,Obstetrics & Gynaecology,Opthalmology,Otorhinolaryngology,General Surgery	NA
Andhra Pradesh	Trust	Guntur		Private (For Profit)	General Medicine,Paediatric medical management,Neurosurgery,Emergency Room Packages,Polytrauma,Plastic & reconstructive,Burns management,Interventional Neuroradiology,Orthopaedics,Obstetrics & Gynaecology,Opthalmology,General Surgery	NA
Andhra Pradesh	Trust	Spsr Nellore		Private (For Profit)	General Medicine,Paediatric medical management,Neurosurgery,Urology,Emergency Room Packages,Polytrauma,Paediatric surgery,Orthopaedics,Obstetrics & Gynaecology,Otorhinolaryngology,General Surgery	NA
Andhra Pradesh	Trust	East Godavari		Private (For Profit)	Paediatric medical management,General Medicine,Emergency Room Packages,Polytrauma,Plastic & reconstructive,Burns management,Neurosurgery,Interventional Neuroradiology,Urology,Orthopaedics,Obstetrics & Gynaecology,General Surgery	NA
Andhra Pradesh	Trust	Chittoor		Private (For Profit)	Polytrauma,Neurosurgery,Interventional Neuroradiology,Orthopaedics,Obstetrics & Gynaecology,General Surgery	NA
Andhra Pradesh	Trust	Spsr Nellore		Private (For Profit)	General Medicine,Paediatric medical management,Neurosurgery,Urology,Emergency Room Packages,Polytrauma,Plastic & reconstructive,Burns management,Interventional Neuroradiology,Orthopaedics,Opthalmology,Otorhinolaryngology,General Surgery	NA
Andhra Pradesh	Trust	Guntur		Private (For Profit)	Paediatric medical management,Polytrauma,Plastic & reconstructive,Burns management,Neurosurgery,Interventional Neuroradiology,Urology,Paediatric surgery,Orthopaedics,Obstetrics & Gynaecology,General Surgery	NA
Andhra Pradesh	Trust	Visakhapatanam		Private (For Profit)	Paediatric medical management,General Medicine,Emergency Room Packages,Polytrauma,Urology,Paediatric surgery,Orthopaedics,Obstetrics & Gynaecology,Otorhinolaryngology,General Surgery	NA
Andhra Pradesh	Trust	Visakhapatanam		Private (For Profit)	Cardiology,Cardio-thoracic & Vascular surgery	NA
Andhra Pradesh	Trust	Krishna		Private (For Profit)	General Medicine,Urology,Paediatric medical management,Polytrauma,Neurosurgery,Interventional Neuroradiology,Paediatric surgery,Orthopaedics,Obstetrics & Gynaecology,Otorhinolaryngology,General Surgery	NA
Andhra Pradesh	Trust	Visakhapatanam		Private (For Profit)	Radiation Oncology,Medical Oncology,Surgical Oncology	NA
Andhra Pradesh	Trust	Visakhapatanam		Private (For Profit)	General Medicine,Urology,Polytrauma,Plastic & reconstructive,Burns management,Neurosurgery,Interventional Neuroradiology,Orthopaedics,Otorhinolaryngology	NA
Andhra Pradesh	Trust	Kurnool		Private (For Profit)	General Medicine,Emergency Room Packages,Polytrauma,Urology,Orthopaedics,General Surgery	NA
Andhra Pradesh	Trust	Y.S.R.		Private (For Profit)	Polytrauma,Urology,Orthopaedics,Obstetrics & Gynaecology,General Surgery	NA
Andhra Pradesh	Trust	Visakhapatanam		Private (For Profit)	Cardiology,Paediatric cancer,Urology,Cardio-thoracic & Vascular surgery	NA
Andhra Pradesh	Trust	East Godavari		Private (For Profit)	Polytrauma,Plastic & reconstructive,Burns management,Neurosurgery,Interventional Neuroradiology,Urology,Orthopaedics,Otorhinolaryngology,General Surgery	NA
Andhra Pradesh	Trust	Visakhapatanam		Private (For Profit)	General Medicine,Paediatric medical management,Neurosurgery,Urology,Emergency Room Packages,Polytrauma,Plastic & reconstructive,Burns management,Interventional Neuroradiology,Paediatric surgery,Orthopaedics,Obstetrics & Gynaecology,Otorhinolaryngology,General Surgery	NA
Andhra Pradesh	Trust	Prakasam		Private (For Profit)	Paediatric medical management,General Medicine,Emergency Room Packages,Polytrauma,Plastic & reconstructive,Burns management,Neurosurgery,Interventional Neuroradiology,Urology,Paediatric surgery,Orthopaedics,Obstetrics & Gynaecology,Opthalmology,Otorhinolaryngology,General Surgery	NA
Andhra Pradesh	Trust	East Godavari		Private (For Profit)	General Medicine,Paediatric medical management,Neurosurgery,Urology,Cardiology,Emergency Room Packages,Polytrauma,Radiation Oncology,Medical Oncology,Surgical Oncology,Interventional Neuroradiology,Paediatric surgery,Cardio-thoracic & Vascular surgery,Orthopaedics,Obstetrics & Gynaecology,Otorhinolaryngology,General Surgery	NA
Andhra Pradesh	Trust	Chittoor		Private (For Profit)	Polytrauma,Orthopaedics,Obstetrics & Gynaecology,General Surgery	NA
Andhra Pradesh	Trust	Chittoor		Private (For Profit)	General Medicine,Urology,Cardiology,Polytrauma,Plastic & reconstructive,Burns management,Neurosurgery,Interventional Neuroradiology,Cardio-thoracic & Vascular surgery,Orthopaedics,Obstetrics & Gynaecology,Otorhinolaryngology,General Surgery	NA
Andhra Pradesh	Trust	West Godavari		Private (For Profit)	Polytrauma,Orthopaedics,Obstetrics & Gynaecology,Opthalmology,General Surgery	NA
Andhra Pradesh	Trust	Spsr Nellore		Private (For Profit)	General Medicine,Urology,Cardiology,Polytrauma,Neurosurgery,Interventional Neuroradiology,Cardio-thoracic & Vascular surgery,Orthopaedics	NA
Andhra Pradesh	Trust	Prakasam		Private (For Profit)	General Medicine,Urology,Paediatric medical management,Emergency Room Packages,Polytrauma,Neurosurgery,Interventional Neuroradiology,Orthopaedics,Opthalmology,Otorhinolaryngology,General Surgery	NA
Andhra Pradesh	Trust	Krishna		Private (For Profit)	Cardiology,Cardio-thoracic & Vascular surgery	NA
Andhra Pradesh	Trust	Kurnool		Private (For Profit)	General Medicine,Urology,Cardiology,Paediatric medical management,Emergency Room Packages,Polytrauma,Plastic & reconstructive,Burns management,Paediatric surgery,Cardio-thoracic & Vascular surgery,Orthopaedics,Obstetrics & Gynaecology,Opthalmology,Otorhinolaryngology,General Surgery	NA
Andhra Pradesh	Trust	Guntur		Private (For Profit)	General Medicine,Paediatric medical management,Neurosurgery,Urology,Emergency Room Packages,Polytrauma,Interventional Neuroradiology,Orthopaedics,Obstetrics & Gynaecology,General Surgery	NA
Andhra Pradesh	Trust	West Godavari		Private (For Profit)	Paediatric medical management,General Medicine,Emergency Room Packages,Polytrauma,Urology,Paediatric surgery,Orthopaedics,General Surgery	NA
Andhra Pradesh	Trust	Anantapur		Private (For Profit)	Opthalmology	NA
Andhra Pradesh	Trust	Guntur		Private (For Profit)	General Medicine,Emergency Room Packages,Polytrauma,Urology,Orthopaedics,General Surgery	NA
Andhra Pradesh	Trust	Guntur		Private (For Profit)	General Medicine,Emergency Room Packages,Polytrauma,Plastic & reconstructive,Burns management,Neurosurgery,Interventional Neuroradiology,Orthopaedics,Obstetrics & Gynaecology,General Surgery	NA
Andhra Pradesh	Trust	Prakasam		Private (For Profit)	General Medicine,Paediatric medical management,Neurosurgery,Emergency Room Packages,Polytrauma,Interventional Neuroradiology,Urology,Orthopaedics,Obstetrics & Gynaecology,Opthalmology,Otorhinolaryngology,General Surgery	NA
Andhra Pradesh	Trust	Prakasam		Private (For Profit)	Paediatric medical management,Paediatric surgery,Obstetrics & Gynaecology,General Surgery	NA
Andhra Pradesh	Trust	Kurnool		Private (For Profit)	Radiation Oncology,Medical Oncology,Surgical Oncology	NA
Andhra Pradesh	Trust	Anantapur		Private (For Profit)	General Medicine,Emergency Room Packages,Polytrauma,Neurosurgery,Interventional Neuroradiology,Urology,Orthopaedics,General Surgery	NA
Andhra Pradesh	Trust	Visakhapatanam		Private (For Profit)	General Medicine,Urology,Paediatric medical management,Polytrauma,Neurosurgery,Interventional Neuroradiology,Orthopaedics,Obstetrics & Gynaecology,Otorhinolaryngology,General Surgery	NA
Andhra Pradesh	Trust	Y.S.R.		Private (For Profit)	General Medicine,Emergency Room Packages,Polytrauma,Urology,Orthopaedics,Obstetrics & Gynaecology,General Surgery	NA
Andhra Pradesh	Trust	East Godavari		Private (For Profit)	Polytrauma,Neurosurgery,Interventional Neuroradiology,Orthopaedics,Obstetrics & Gynaecology,General Surgery	NA
Andhra Pradesh	Trust	Prakasam		Private (For Profit)	Paediatric medical management,Polytrauma,Urology,Paediatric surgery,Orthopaedics,Obstetrics & Gynaecology,Opthalmology,Otorhinolaryngology,General Surgery	NA
Andhra Pradesh	Trust	Chittoor		Private (For Profit)	Paediatric medical management,Paediatric surgery,Obstetrics & Gynaecology	NA
Andhra Pradesh	Trust	Visakhapatanam		Private (For Profit)	Opthalmology	NA
Andhra Pradesh	Trust	Kurnool		Private (For Profit)	Paediatric medical management,General Medicine,Emergency Room Packages,Polytrauma,Urology,Paediatric surgery,Orthopaedics,Obstetrics & Gynaecology,General Surgery	NA
Andhra Pradesh	Trust	Anantapur		Private (For Profit)	General Medicine,Urology,Paediatric medical management,Emergency Room Packages,Polytrauma,Plastic & reconstructive,Burns management,Neurosurgery,Interventional Neuroradiology,Paediatric surgery,Orthopaedics,Obstetrics & Gynaecology,Opthalmology,Otorhinolaryngology,General Surgery	NA
Andhra Pradesh	Trust	Saharsa		Private (For Profit)	General Medicine,Urology,Emergency Room Packages,Polytrauma,Plastic & reconstructive,Burns management,Orthopaedics,Otorhinolaryngology,General Surgery	NA
Andhra Pradesh	Trust	Guntur		Private (For Profit)	General Medicine,Emergency Room Packages,Polytrauma,Plastic & reconstructive,Burns management,Neurosurgery,Interventional Neuroradiology,Orthopaedics,Obstetrics & Gynaecology,Opthalmology,Otorhinolaryngology,General Surgery	NA
Andhra Pradesh	Trust	Guntur		Private (For Profit)	General Medicine,Paediatric medical management,Neurosurgery,Urology,Emergency Room Packages,Polytrauma,Paediatric surgery,Orthopaedics,Obstetrics & Gynaecology,Otorhinolaryngology,General Surgery	NA
Andhra Pradesh	Trust	Chittoor		Private (For Profit)	Opthalmology	NA
Andhra Pradesh	Trust	Anantapur		Private (For Profit)	Paediatric medical management,Polytrauma,Urology,Orthopaedics,Obstetrics & Gynaecology,General Surgery	NA
Andhra Pradesh	Trust	Krishna		Private (For Profit)	Opthalmology	NA
Andhra Pradesh	Trust	East Godavari		Private (For Profit)	Polytrauma,Neurosurgery,Interventional Neuroradiology,Orthopaedics	NA
Andhra Pradesh	Trust	Spsr Nellore		Private (For Profit)	General Medicine,Cardiology,Emergency Room Packages,Polytrauma,Urology,Cardio-thoracic & Vascular surgery,Orthopaedics,Obstetrics & Gynaecology,Otorhinolaryngology,General Surgery	NA
Andhra Pradesh	Trust	Visakhapatanam		Private (For Profit)	General Medicine,Paediatric medical management,Neurosurgery,Emergency Room Packages,Polytrauma,Plastic & reconstructive,Burns management,Interventional Neuroradiology,Urology,Paediatric surgery,Orthopaedics,Obstetrics & Gynaecology,Otorhinolaryngology,General Surgery	NA
Andhra Pradesh	Trust	Visakhapatanam		Private (For Profit)	Opthalmology	NA
Andhra Pradesh	Trust	Kurnool		Private (For Profit)	General Medicine,Paediatric medical management,Neurosurgery,Urology,Cardiology,Emergency Room Packages,Polytrauma,Plastic & reconstructive,Burns management,Medical Oncology,Surgical Oncology,Interventional Neuroradiology,Paediatric surgery,Cardio-thoracic & Vascular surgery,Orthopaedics,Obstetrics & Gynaecology,Opthalmology,Otorhinolaryngology,General Surgery	NA
Andhra Pradesh	Trust	Krishna		Private (For Profit)	General Medicine,Paediatric medical management,Neurosurgery,Polytrauma,Interventional Neuroradiology,Urology,Orthopaedics	NA
Andhra Pradesh	Trust	Spsr Nellore		Private (For Profit)	General Medicine,Urology,Emergency Room Packages,General Surgery	NA
Andhra Pradesh	Trust	East Godavari		Private (For Profit)	Polytrauma,Neurosurgery,Interventional Neuroradiology,Orthopaedics	NA
Andhra Pradesh	Trust	Kurnool		Private (For Profit)	Polytrauma,Plastic & reconstructive,Burns management,Neurosurgery,Interventional Neuroradiology,Urology,Paediatric surgery,Orthopaedics,General Surgery	NA
Andhra Pradesh	Trust	Prakasam		Private (For Profit)	Polytrauma,Neurosurgery,Interventional Neuroradiology,Orthopaedics,Obstetrics & Gynaecology,General Surgery	NA
Andhra Pradesh	Trust	East Godavari		Private (For Profit)	Plastic & reconstructive,Burns management,Opthalmology	NA
Andhra Pradesh	Trust	Guntur		Private (For Profit)	Paediatric medical management,General Medicine,Emergency Room Packages,Polytrauma,Plastic & reconstructive,Burns management,Urology,Paediatric surgery,Orthopaedics,Obstetrics & Gynaecology,General Surgery	NA
Andhra Pradesh	Trust	Spsr Nellore		Private (For Profit)	General Medicine,Urology,Emergency Room Packages,Polytrauma,Plastic & reconstructive,Burns management,Neurosurgery,Interventional Neuroradiology,Orthopaedics,Obstetrics & Gynaecology,Otorhinolaryngology,General Surgery	NA
Andhra Pradesh	Trust	Guntur		Private (For Profit)	General Medicine,Paediatric medical management,Neurosurgery,Urology,Cardiology,Emergency Room Packages,Polytrauma,Plastic & reconstructive,Burns management,Surgical Oncology,Interventional Neuroradiology,Paediatric surgery,Cardio-thoracic & Vascular surgery,Orthopaedics,Obstetrics & Gynaecology,Opthalmology,Otorhinolaryngology,General Surgery	NA
Andhra Pradesh	Trust	Visakhapatanam		Private (For Profit)	General Medicine,Paediatric medical management,Neurosurgery,Urology,Cardiology,Emergency Room Packages,Polytrauma,Interventional Neuroradiology,Cardio-thoracic & Vascular surgery,Orthopaedics,Obstetrics & Gynaecology,Opthalmology,Otorhinolaryngology,General Surgery	NA
Andhra Pradesh	Trust	Guntur		Private (For Profit)	Urology,Obstetrics & Gynaecology,Opthalmology,Otorhinolaryngology,General Surgery	NA
Andhra Pradesh	Trust	Visakhapatanam		Private (For Profit)	General Medicine,Urology,Cardiology,Paediatric medical management,Polytrauma,Plastic & reconstructive,Burns management,Neurosurgery,Interventional Neuroradiology,Paediatric surgery,Cardio-thoracic & Vascular surgery,Orthopaedics	NA
Andhra Pradesh	Trust	Pune		Private (For Profit)	Paediatric medical management,Polytrauma,Plastic & reconstructive,Burns management,Paediatric surgery,Orthopaedics,General Surgery	NA
Andhra Pradesh	Trust	Chittoor		Private (For Profit)	General Medicine,Urology,Emergency Room Packages,Polytrauma,Plastic & reconstructive,Burns management,Neurosurgery,Interventional Neuroradiology,Orthopaedics,Opthalmology,Otorhinolaryngology,General Surgery	NA
Andhra Pradesh	Trust	Visakhapatanam		Private (For Profit)	General Medicine,Urology,Cardiology,Emergency Room Packages,Polytrauma,Plastic & reconstructive,Burns management,Neurosurgery,Interventional Neuroradiology,Cardio-thoracic & Vascular surgery,Orthopaedics,Obstetrics & Gynaecology,Opthalmology,Otorhinolaryngology,General Surgery	NA
Andhra Pradesh	Trust	Visakhapatanam		Private (For Profit)	General Medicine,Cardiology,Paediatric medical management,Emergency Room Packages,Polytrauma,Plastic & reconstructive,Burns management,Neurosurgery,Interventional Neuroradiology,Urology,Orthopaedics,General Surgery	NA
Andhra Pradesh	Trust	Chittoor		Private (For Profit)	General Medicine,Emergency Room Packages,Plastic & reconstructive,Burns management,Urology,Paediatric surgery,General Surgery	NA
Andhra Pradesh	Trust	Guntur		Private (For Profit)	Paediatric medical management,Plastic & reconstructive,Burns management,Paediatric surgery	NA
Andhra Pradesh	Trust	Spsr Nellore		Private (For Profit)	General Medicine,Urology,Cardiology,Paediatric medical management,Emergency Room Packages,Polytrauma,Plastic & reconstructive,Burns management,Orthopaedics,Obstetrics & Gynaecology,Otorhinolaryngology,General Surgery	NA
Andhra Pradesh	Trust	East Godavari		Private (For Profit)	Polytrauma,Urology,Orthopaedics,General Surgery	NA
Andhra Pradesh	Trust	Guntur		Private (For Profit)	Urology,Obstetrics & Gynaecology,Opthalmology,Otorhinolaryngology,General Surgery	NA
Andhra Pradesh	Trust	Visakhapatanam		Private (For Profit)	General Medicine,Urology,Cardiology,Paediatric medical management,Polytrauma,Plastic & reconstructive,Burns management,Neurosurgery,Interventional Neuroradiology,Paediatric surgery,Cardio-thoracic & Vascular surgery,Orthopaedics	NA
Andhra Pradesh	Trust	Pune		Private (For Profit)	Paediatric medical management,Polytrauma,Plastic & reconstructive,Burns management,Paediatric surgery,Orthopaedics,General Surgery	NA
Andhra Pradesh	Trust	Chittoor		Private (For Profit)	General Medicine,Urology,Emergency Room Packages,Polytrauma,Plastic & reconstructive,Burns management,Neurosurgery,Interventional Neuroradiology,Orthopaedics,Opthalmology,Otorhinolaryngology,General Surgery	NA
Andhra Pradesh	Trust	Visakhapatanam		Private (For Profit)	General Medicine,Urology,Cardiology,Emergency Room Packages,Polytrauma,Plastic & reconstructive,Burns management,Neurosurgery,Interventional Neuroradiology,Cardio-thoracic & Vascular surgery,Orthopaedics,Obstetrics & Gynaecology,Opthalmology,Otorhinolaryngology,General Surgery	NA
Andhra Pradesh	Trust	Visakhapatanam		Private (For Profit)	General Medicine,Cardiology,Paediatric medical management,Emergency Room Packages,Polytrauma,Plastic & reconstructive,Burns management,Neurosurgery,Interventional Neuroradiology,Urology,Orthopaedics,General Surgery	NA
Andhra Pradesh	Trust	Chittoor		Private (For Profit)	General Medicine,Emergency Room Packages,Plastic & reconstructive,Burns management,Urology,Paediatric surgery,General Surgery	NA
Andhra Pradesh	Trust	Guntur		Private (For Profit)	Paediatric medical management,Plastic & reconstructive,Burns management,Paediatric surgery	NA
Andhra Pradesh	Trust	Spsr Nellore		Private (For Profit)	General Medicine,Urology,Cardiology,Paediatric medical management,Emergency Room Packages,Polytrauma,Plastic & reconstructive,Burns management,Orthopaedics,Obstetrics & Gynaecology,Otorhinolaryngology,General Surgery	NA
Andhra Pradesh	Trust	East Godavari		Private (For Profit)	Polytrauma,Urology,Orthopaedics,General Surgery	NA
Andhra Pradesh	Trust	Visakhapatanam		Private (For Profit)	Radiation Oncology,Medical Oncology,Surgical Oncology,Paediatric surgery,Obstetrics & Gynaecology,General Surgery	NA
Andhra Pradesh	Trust	Visakhapatanam		Private (For Profit)	General Medicine,Paediatric medical management,Neurosurgery,Urology,Cardiology,Emergency Room Packages,Polytrauma,Radiation Oncology,Medical Oncology,Surgical Oncology,Interventional Neuroradiology,Paediatric surgery,Cardio-thoracic & Vascular surgery,Orthopaedics,Obstetrics & Gynaecology,Otorhinolaryngology,General Surgery	NA
Andhra Pradesh	Trust	Visakhapatanam		Private (For Profit)	General Medicine,Paediatric medical management,Neurosurgery,Urology,Cardiology,Polytrauma,Interventional Neuroradiology,Cardio-thoracic & Vascular surgery,Orthopaedics,Otorhinolaryngology,General Surgery	NA
Andhra Pradesh	Trust	Guntur		Private (For Profit)	General Medicine,Urology,Emergency Room Packages,Polytrauma,Orthopaedics,General Surgery	NA
Andhra Pradesh	Trust	Kurnool		Private (For Profit)	General Medicine,Urology,Cardiology,Emergency Room Packages,Polytrauma,Plastic & reconstructive,Burns management,Neurosurgery,Interventional Neuroradiology,Cardio-thoracic & Vascular surgery,Orthopaedics,Opthalmology,Otorhinolaryngology,General Surgery	NA
Andhra Pradesh	Trust	Chittoor		Private (For Profit)	General Medicine,Urology,Paediatric medical management,Emergency Room Packages,Polytrauma,Orthopaedics,Obstetrics & Gynaecology,Otorhinolaryngology,General Surgery	NA
Andhra Pradesh	Trust	West Godavari		Private (For Profit)	Paediatric medical management,General Medicine,Emergency Room Packages,Polytrauma,Urology,Orthopaedics,Obstetrics & Gynaecology,General Surgery	NA
Andhra Pradesh	Trust	Krishna		Private (For Profit)	Polytrauma,Urology,Orthopaedics,Obstetrics & Gynaecology,Otorhinolaryngology,General Surgery	NA
Andhra Pradesh	Trust	East Godavari		Private (For Profit)	Opthalmology	NA
Andhra Pradesh	Trust	Guntur		Private (For Profit)	General Medicine,Emergency Room Packages,Polytrauma,Urology,Orthopaedics,Obstetrics & Gynaecology,General Surgery	NA
Andhra Pradesh	Trust	Anantapur		Private (For Profit)	General Medicine,Emergency Room Packages,Polytrauma,Plastic & reconstructive,Burns management,Neurosurgery,Interventional Neuroradiology,Urology,Paediatric surgery,Orthopaedics,Obstetrics & Gynaecology,Opthalmology,Otorhinolaryngology,General Surgery	NA
Andhra Pradesh	Trust	Srikakulam		Private (For Profit)	General Medicine,Paediatric medical management,Neurosurgery,Emergency Room Packages,Polytrauma,Interventional Neuroradiology,Orthopaedics,Obstetrics & Gynaecology,Otorhinolaryngology,General Surgery	NA
Andhra Pradesh	Trust	West Godavari		Private (For Profit)	Radiation Oncology,Medical Oncology,Surgical Oncology,General Surgery	NA
Andhra Pradesh	Trust	East Godavari		Private (For Profit)	Polytrauma,Orthopaedics,Obstetrics & Gynaecology,General Surgery	NA
Andhra Pradesh	Trust	Kurnool		Private (For Profit)	Paediatric medical management,Paediatric surgery	NA
Andhra Pradesh	Trust	Guntur		Private (For Profit)	General Medicine,Paediatric medical management,Neurosurgery,Cardiology,Emergency Room Packages,Polytrauma,Plastic & reconstructive,Burns management,Interventional Neuroradiology,Urology,Paediatric surgery,Orthopaedics,Obstetrics & Gynaecology,Opthalmology,Otorhinolaryngology,General Surgery	NA
Andhra Pradesh	Trust	Guntur		Private (For Profit)	Polytrauma,Orthopaedics,Obstetrics & Gynaecology,General Surgery	NA
Andhra Pradesh	Trust	Chittoor		Private (For Profit)	General Medicine,Paediatric medical management,Neurosurgery,Urology,Cardiology,Emergency Room Packages,Polytrauma,Plastic & reconstructive,Burns management,Medical Oncology,Surgical Oncology,Interventional Neuroradiology,Paediatric surgery,Cardio-thoracic & Vascular surgery,Orthopaedics,Obstetrics & Gynaecology,Opthalmology,Otorhinolaryngology,General Surgery	NA
Andhra Pradesh	Trust	Chittoor		Private (For Profit)	General Medicine,Urology,Emergency Room Packages,Polytrauma,Orthopaedics,Obstetrics & Gynaecology,General Surgery	NA
Andhra Pradesh	Trust	Visakhapatanam		Private (For Profit)	Polytrauma,Neurosurgery,Interventional Neuroradiology,Urology,Orthopaedics,Obstetrics & Gynaecology,General Surgery	NA
Andhra Pradesh	Trust	East Godavari		Private (For Profit)	Polytrauma,Surgical Oncology,Urology,Orthopaedics,Obstetrics & Gynaecology,Otorhinolaryngology,General Surgery	NA
Andhra Pradesh	Trust	Srikakulam		Private (For Profit)	Polytrauma,Urology,Orthopaedics,Obstetrics & Gynaecology,Otorhinolaryngology,General Surgery	NA
Andhra Pradesh	Trust	East Godavari		Private (For Profit)	General Surgery	NA
Andhra Pradesh	Trust	East Godavari		Private (For Profit)	General Medicine,Paediatric medical management,Neurosurgery,Polytrauma,Plastic & reconstructive,Burns management,Interventional Neuroradiology,Urology,Orthopaedics,Obstetrics & Gynaecology,Otorhinolaryngology,General Surgery	NA
Andhra Pradesh	Trust	Guntur		Private (For Profit)	Opthalmology	NA
Andhra Pradesh	Trust	Guntur		Private (For Profit)	General Medicine,Urology,Emergency Room Packages,Polytrauma,Neurosurgery,Interventional Neuroradiology,Orthopaedics,Obstetrics & Gynaecology,Otorhinolaryngology,General Surgery	NA
Andhra Pradesh	Trust	Visakhapatanam		Private (For Profit)	General Medicine,Paediatric medical management,Neurosurgery,Emergency Room Packages,Polytrauma,Interventional Neuroradiology,Urology,Paediatric surgery,Orthopaedics,Otorhinolaryngology,General Surgery	NA
Andhra Pradesh	Trust	Y.S.R.		Private (For Profit)	General Medicine,Urology,Polytrauma,Plastic & reconstructive,Burns management,Medical Oncology,Surgical Oncology,Neurosurgery,Interventional Neuroradiology,Orthopaedics,Obstetrics & Gynaecology,Otorhinolaryngology,General Surgery	NA
Andhra Pradesh	Trust	Krishna		Private (For Profit)	Radiation Oncology,Medical Oncology,Surgical Oncology,General Surgery	NA
Andhra Pradesh	Trust	Kurnool		Private (For Profit)	General Medicine,Emergency Room Packages,Polytrauma,Urology,Orthopaedics,Otorhinolaryngology,General Surgery	NA
Andhra Pradesh	Trust	Krishna		Private (For Profit)	Polytrauma,Neurosurgery,Interventional Neuroradiology,Orthopaedics	NA
Andhra Pradesh	Trust	Kurnool		Private (For Profit)	General Medicine,Paediatric medical management,Neurosurgery,Urology,Emergency Room Packages,Polytrauma,Radiation Oncology,Medical Oncology,Surgical Oncology,Interventional Neuroradiology,Paediatric surgery,Orthopaedics,Obstetrics & Gynaecology,Opthalmology,Otorhinolaryngology,General Surgery	NA
Andhra Pradesh	Trust	West Godavari		Private (For Profit)	Polytrauma,Urology,Orthopaedics,Otorhinolaryngology,General Surgery	NA
Andhra Pradesh	Trust	Visakhapatanam		Private (For Profit)	Polytrauma,Urology,Orthopaedics,Obstetrics & Gynaecology,General Surgery	NA
Andhra Pradesh	Trust	East Godavari		Private (For Profit)	General Medicine,Emergency Room Packages,Polytrauma,Urology,Orthopaedics,Obstetrics & Gynaecology,General Surgery	NA
Andhra Pradesh	Trust	East Godavari		Private (For Profit)	General Medicine,Urology,Cardiology,Polytrauma,Neurosurgery,Interventional Neuroradiology,Cardio-thoracic & Vascular surgery,Orthopaedics	NA
Andhra Pradesh	Trust	Spsr Nellore		Private (For Profit)	General Medicine,Paediatric medical management,Neurosurgery,Urology,Cardiology,Emergency Room Packages,Polytrauma,Plastic & reconstructive,Burns management,Interventional Neuroradiology,Paediatric surgery,Cardio-thoracic & Vascular surgery,Orthopaedics,Obstetrics & Gynaecology,Opthalmology,Otorhinolaryngology,General Surgery	NA
Andhra Pradesh	Trust	West Godavari		Private (For Profit)	General Medicine,Emergency Room Packages,Polytrauma,Urology,Orthopaedics,Obstetrics & Gynaecology,General Surgery	NA
Andhra Pradesh	Trust	West Godavari		Private (For Profit)	General Medicine,Emergency Room Packages,Polytrauma,Orthopaedics,Obstetrics & Gynaecology,Otorhinolaryngology,General Surgery	NA
Andhra Pradesh	Trust	Krishna		Private (For Profit)	General Medicine,Urology,Paediatric medical management,Emergency Room Packages,Polytrauma,Plastic & reconstructive,Burns management,Neurosurgery,Interventional Neuroradiology,Orthopaedics,Obstetrics & Gynaecology,Otorhinolaryngology,General Surgery	NA
Andhra Pradesh	Trust	Chittoor		Private (For Profit)	General Medicine,Emergency Room Packages,Polytrauma,Plastic & reconstructive,Burns management,Neurosurgery,Interventional Neuroradiology,Urology,Orthopaedics,Obstetrics & Gynaecology,General Surgery	NA
Andhra Pradesh	Trust	Kurnool		Private (For Profit)	Opthalmology	NA
Andhra Pradesh	Trust	Y.S.R.		Private (For Profit)	Cardiology,General Medicine,Emergency Room Packages,Polytrauma,Plastic & reconstructive,Burns management,Neurosurgery,Interventional Neuroradiology,Urology,Cardio-thoracic & Vascular surgery,Orthopaedics,Obstetrics & Gynaecology,Otorhinolaryngology,General Surgery	NA
Andhra Pradesh	Trust	East Godavari		Private (For Profit)	Polytrauma,Neurosurgery,Interventional Neuroradiology,Orthopaedics,General Surgery	NA
Andhra Pradesh	Trust	East Godavari		Private (For Profit)	Opthalmology	NA
Andhra Pradesh	Trust	Kurnool		Private (For Profit)	General Medicine,Urology,Cardiology,Polytrauma,Neurosurgery,Interventional Neuroradiology,Cardio-thoracic & Vascular surgery,Orthopaedics,Otorhinolaryngology,General Surgery	NA
Andhra Pradesh	Trust	East Godavari		Private (For Profit)	Polytrauma,Orthopaedics,General Surgery	NA
Andhra Pradesh	Trust	Spsr Nellore		Private (For Profit)	Paediatric medical management,Polytrauma,Paediatric surgery,Orthopaedics,Obstetrics & Gynaecology,General Surgery	NA
Andhra Pradesh	Trust	Spsr Nellore		Private (For Profit)	General Medicine,Paediatric medical management,Neurosurgery,Urology,Cardiology,Emergency Room Packages,Polytrauma,Plastic & reconstructive,Burns management,Interventional Neuroradiology,Paediatric surgery,Cardio-thoracic & Vascular surgery,Orthopaedics,Obstetrics & Gynaecology,Opthalmology,Otorhinolaryngology,General Surgery	NA
Andhra Pradesh	Trust	Chittoor		Private (For Profit)	General Medicine,Urology,Paediatric medical management,Emergency Room Packages,Polytrauma,Plastic & reconstructive,Burns management,Neurosurgery,Interventional Neuroradiology,Orthopaedics,Obstetrics & Gynaecology,General Surgery	NA
Andhra Pradesh	Trust	Y.S.R.		Private (For Profit)	General Medicine,Emergency Room Packages,Polytrauma,Orthopaedics,General Surgery	NA
Andhra Pradesh	Trust	Guntur		Private (For Profit)	General Medicine,Paediatric medical management,Neurosurgery,Urology,Emergency Room Packages,Polytrauma,Plastic & reconstructive,Burns management,Interventional Neuroradiology,Paediatric surgery,Orthopaedics,Obstetrics & Gynaecology,Otorhinolaryngology,General Surgery	NA
Andhra Pradesh	Trust	Guntur		Private (For Profit)	Opthalmology	NA
Andhra Pradesh	Trust	Guntur		Private (For Profit)	General Medicine,Paediatric medical management,Neurosurgery,Urology,Emergency Room Packages,Polytrauma,Interventional Neuroradiology,Paediatric surgery,Orthopaedics,Obstetrics & Gynaecology,Opthalmology,Otorhinolaryngology,General Surgery	NA
Andhra Pradesh	Trust	Chittoor		Private (For Profit)	Opthalmology	NA
Andhra Pradesh	Trust	West Godavari		Private (For Profit)	Opthalmology	NA
Andhra Pradesh	Trust	East Godavari		Private (For Profit)	Paediatric medical management,General Medicine,Emergency Room Packages,Polytrauma,Urology,Orthopaedics,Obstetrics & Gynaecology,Otorhinolaryngology,General Surgery	NA
Andhra Pradesh	Trust	Guntur		Private (For Profit)	Paediatric medical management,General Medicine,Emergency Room Packages,Polytrauma,Neurosurgery,Interventional Neuroradiology,Urology,Paediatric surgery,Orthopaedics,Otorhinolaryngology,General Surgery	NA
Andhra Pradesh	Trust	West Godavari		Private (For Profit)	Polytrauma,Orthopaedics,General Surgery	NA
Andhra Pradesh	Trust	Prakasam		Private (For Profit)	General Medicine,Emergency Room Packages,Polytrauma,Orthopaedics,General Surgery	NA
Andhra Pradesh	Trust	Kurnool		Private (For Profit)	General Medicine,Emergency Room Packages,Polytrauma,Urology,Paediatric surgery,Orthopaedics,Obstetrics & Gynaecology,Otorhinolaryngology,General Surgery	NA
Andhra Pradesh	Trust	West Godavari		Private (For Profit)	Opthalmology	NA
Andhra Pradesh	Trust	Guntur		Private (For Profit)	General Medicine,Emergency Room Packages,Polytrauma,Urology,Orthopaedics,Obstetrics & Gynaecology,General Surgery	NA
Andhra Pradesh	Trust	Krishna		Private (For Profit)	General Medicine,Urology,Cardiology,Emergency Room Packages,Paediatric cancer,Polytrauma,Plastic & reconstructive,Burns management,Neurosurgery,Interventional Neuroradiology,Paediatric surgery,Orthopaedics,Obstetrics & Gynaecology,Otorhinolaryngology,General Surgery	NA
Andhra Pradesh	Trust	Guntur		Private (For Profit)	Opthalmology	NA
Andhra Pradesh	Trust	Visakhapatanam		Private (For Profit)	General Medicine,Urology,Cardiology,Paediatric medical management,Polytrauma,Plastic & reconstructive,Burns management,Neurosurgery,Interventional Neuroradiology,Paediatric surgery,Cardio-thoracic & Vascular surgery,Orthopaedics,Obstetrics & Gynaecology,Opthalmology,Otorhinolaryngology,General Surgery	NA
Andhra Pradesh	Trust	Anantapur		Private (For Profit)	General Medicine,Emergency Room Packages,Polytrauma,Urology,Orthopaedics,Obstetrics & Gynaecology,Opthalmology,Otorhinolaryngology,General Surgery	NA
Andhra Pradesh	Trust	West Godavari		Private (For Profit)	General Medicine,Urology,Emergency Room Packages,Polytrauma,Neurosurgery,Interventional Neuroradiology,Orthopaedics,Obstetrics & Gynaecology,Otorhinolaryngology,General Surgery	NA
Andhra Pradesh	Trust	Guntur		Private (For Profit)	Paediatric medical management,General Medicine,Emergency Room Packages,Polytrauma,Neurosurgery,Interventional Neuroradiology,Urology,Paediatric surgery,Orthopaedics,Obstetrics & Gynaecology,Otorhinolaryngology,General Surgery	NA
Andhra Pradesh	Trust	West Godavari		Private (For Profit)	General Medicine,Urology,Polytrauma,Neurosurgery,Interventional Neuroradiology,Orthopaedics,Obstetrics & Gynaecology,Opthalmology,Otorhinolaryngology,General Surgery	NA
Andhra Pradesh	Trust	West Godavari		Private (For Profit)	General Medicine,Paediatric medical management,Emergency Room Packages,Polytrauma,Plastic & reconstructive,Burns management,Neurosurgery,Interventional Neuroradiology,Urology,Paediatric surgery,Orthopaedics,Obstetrics & Gynaecology,Opthalmology,Otorhinolaryngology,General Surgery	NA
Andhra Pradesh	Trust	Guntur		Private (For Profit)	Opthalmology	NA
Andhra Pradesh	Trust	Anantapur		Private (For Profit)	Polytrauma,Neurosurgery,Interventional Neuroradiology,Urology,Orthopaedics,Obstetrics & Gynaecology,General Surgery	NA
Andhra Pradesh	Trust	Visakhapatanam		Private (For Profit)	Polytrauma,Neurosurgery,Interventional Neuroradiology,Urology,Paediatric surgery,Orthopaedics,Obstetrics & Gynaecology,Otorhinolaryngology,General Surgery	NA
Andhra Pradesh	Trust	East Godavari		Private (For Profit)	Polytrauma,Orthopaedics,General Surgery	NA
Andhra Pradesh	Trust	Visakhapatanam		Private (For Profit)	Opthalmology	NA
Andhra Pradesh	Trust	Guntur		Private (For Profit)	Paediatric medical management,Polytrauma,Urology,Orthopaedics,Obstetrics & Gynaecology,General Surgery	NA
Andhra Pradesh	Trust	Chittoor		Private (For Profit)	General Medicine,Urology,Emergency Room Packages,Polytrauma,Orthopaedics,Obstetrics & Gynaecology,General Surgery	NA
Andhra Pradesh	Trust	Anantapur		Private (For Profit)	Polytrauma,Plastic & reconstructive,Burns management,Neurosurgery,Interventional Neuroradiology,Urology,Orthopaedics,Otorhinolaryngology,General Surgery	NA
Andhra Pradesh	Trust	Anantapur		Private (For Profit)	Polytrauma,Plastic & reconstructive,Burns management,Neurosurgery,Interventional Neuroradiology,Urology,Paediatric surgery,Orthopaedics,Obstetrics & Gynaecology,General Surgery	NA
Andhra Pradesh	Trust	Krishna		Private (For Profit)	Polytrauma,Plastic & reconstructive,Burns management,Orthopaedics,General Surgery	NA
Andhra Pradesh	Trust	West Godavari		Private (For Profit)	General Medicine,Emergency Room Packages,Polytrauma,Plastic & reconstructive,Burns management,Urology,Orthopaedics,Obstetrics & Gynaecology,Otorhinolaryngology,General Surgery	NA
Andhra Pradesh	Trust	Visakhapatanam		Private (For Profit)	Polytrauma,Urology,Orthopaedics,Otorhinolaryngology,General Surgery	NA
Andhra Pradesh	Trust	Anantapur		Private (For Profit)	General Medicine,Emergency Room Packages,Polytrauma,Plastic & reconstructive,Burns management,Urology,Paediatric surgery,Orthopaedics,Otorhinolaryngology,General Surgery	NA
Andhra Pradesh	Trust	Guntur		Private (For Profit)	General Medicine,Emergency Room Packages,Polytrauma,Urology,Orthopaedics,General Surgery	NA
Andhra Pradesh	Trust	Guntur		Private (For Profit)	General Medicine,Emergency Room Packages,Polytrauma,Urology,Orthopaedics,Obstetrics & Gynaecology,Otorhinolaryngology,General Surgery	NA
Andhra Pradesh	Trust	Krishna		Private (For Profit)	General Medicine,Urology,Polytrauma,Neurosurgery,Interventional Neuroradiology,Orthopaedics,General Surgery	NA
Andhra Pradesh	Trust	Visakhapatanam		Private (For Profit)	General Medicine,Paediatric medical management,Neurosurgery,Polytrauma,Interventional Neuroradiology,Urology,Orthopaedics,Obstetrics & Gynaecology,General Surgery	NA
Andhra Pradesh	Trust	Visakhapatanam		Private (For Profit)	Paediatric cancer,Otorhinolaryngology	NA
Andhra Pradesh	Trust	Y.S.R.		Private (For Profit)	General Medicine,Paediatric medical management,Neurosurgery,Urology,Emergency Room Packages,Polytrauma,Orthopaedics,General Surgery	NA
Andhra Pradesh	Trust	Dhanbad		Private (For Profit)	General Medicine,Urology,Cardiology,Emergency Room Packages,Polytrauma,Plastic & reconstructive,Burns management,Radiation Oncology,Medical Oncology,Surgical Oncology,Neurosurgery,Interventional Neuroradiology,Cardio-thoracic & Vascular surgery,Orthopaedics,Obstetrics & Gynaecology,General Surgery	NA
Andhra Pradesh	Trust	Kurnool		Private (For Profit)	Paediatric cancer,Obstetrics & Gynaecology,Otorhinolaryngology,General Surgery	NA
Andhra Pradesh	Trust	Guntur		Private (For Profit)	General Medicine,Urology,Emergency Room Packages,Polytrauma,Plastic & reconstructive,Burns management,Neurosurgery,Interventional Neuroradiology,Orthopaedics,Obstetrics & Gynaecology,Otorhinolaryngology,General Surgery	NA
Andhra Pradesh	Trust	Guntur		Private (For Profit)	Polytrauma,Neurosurgery,Interventional Neuroradiology,Orthopaedics	NA
Andhra Pradesh	Trust	Y.S.R.		Private (For Profit)	Polytrauma,Orthopaedics,General Surgery	NA
Andhra Pradesh	Trust	Guntur		Private (For Profit)	Polytrauma,Orthopaedics	NA
Andhra Pradesh	Trust	West Godavari		Private (For Profit)	General Medicine,Emergency Room Packages,Polytrauma,Urology,Orthopaedics,General Surgery	NA
Andhra Pradesh	Trust	Chittoor		Private (For Profit)	Cardiology,Cardio-thoracic & Vascular surgery,Obstetrics & Gynaecology,General Surgery	NA
Andhra Pradesh	Trust	Y.S.R.		Private (For Profit)	General Medicine,Emergency Room Packages,Obstetrics & Gynaecology,Opthalmology,General Surgery	NA
Andhra Pradesh	Trust	Visakhapatanam		Private (For Profit)	Paediatric medical management,General Medicine,Emergency Room Packages,Polytrauma,Plastic & reconstructive,Burns management,Neurosurgery,Interventional Neuroradiology,Urology,Paediatric surgery,Orthopaedics,Obstetrics & Gynaecology,Opthalmology,Otorhinolaryngology,General Surgery	NA
Andhra Pradesh	Trust	Pune		Private (For Profit)	General Medicine,Paediatric medical management,Neurosurgery,Emergency Room Packages,Polytrauma,Interventional Neuroradiology,Urology,Orthopaedics,Obstetrics & Gynaecology,Otorhinolaryngology,General Surgery	NA
Andhra Pradesh	Trust	Guntur		Private (For Profit)	Paediatric medical management,General Medicine,Emergency Room Packages,Polytrauma,Urology,Paediatric surgery,Orthopaedics,Obstetrics & Gynaecology,General Surgery	NA
Andhra Pradesh	Trust	Spsr Nellore		Private (For Profit)	Polytrauma,Orthopaedics	NA
Andhra Pradesh	Trust	Krishna		Private (For Profit)	General Medicine,Urology,Polytrauma,Orthopaedics,Obstetrics & Gynaecology,General Surgery	NA
Andhra Pradesh	Trust	Guntur		Private (For Profit)	General Medicine,Emergency Room Packages,Polytrauma,Neurosurgery,Interventional Neuroradiology,Urology,Orthopaedics,Obstetrics & Gynaecology,Otorhinolaryngology,General Surgery	NA
Andhra Pradesh	Trust	Guntur		Private (For Profit)	General Medicine,Urology,Polytrauma,Neurosurgery,Interventional Neuroradiology,Orthopaedics,General Surgery	NA
Andhra Pradesh	Trust	Kurnool		Private (For Profit)	General Medicine,Emergency Room Packages,Polytrauma,Plastic & reconstructive,Burns management,Neurosurgery,Interventional Neuroradiology,Urology,Orthopaedics,Obstetrics & Gynaecology,Otorhinolaryngology,General Surgery	NA
Andhra Pradesh	Trust	Guntur		Private (For Profit)	Paediatric medical management,General Medicine,Emergency Room Packages,Urology,Paediatric surgery,Obstetrics & Gynaecology,General Surgery	NA
Andhra Pradesh	Trust	Kurnool		Private (For Profit)	Opthalmology	NA
Andhra Pradesh	Trust	Anantapur		Private (For Profit)	Opthalmology	NA
Andhra Pradesh	Trust	Prakasam		Private (For Profit)	Paediatric medical management,Polytrauma,Urology,Paediatric surgery,Orthopaedics,Obstetrics & Gynaecology,Otorhinolaryngology,General Surgery	NA
Andhra Pradesh	Trust	Anantapur		Private (For Profit)	Opthalmology	NA
Andhra Pradesh	Trust	Chittoor		Private (For Profit)	Cardiology,Cardio-thoracic & Vascular surgery	NA
Andhra Pradesh	Trust	Y.S.R.		Private (For Profit)	Opthalmology	NA
Andhra Pradesh	Trust	East Godavari		Private (For Profit)	Polytrauma,Radiation Oncology,Medical Oncology,Surgical Oncology,Orthopaedics,General Surgery	NA
Andhra Pradesh	Trust	Guntur		Private (For Profit)	Polytrauma,Urology,Orthopaedics,Obstetrics & Gynaecology,Otorhinolaryngology,General Surgery	NA
Andhra Pradesh	Trust	East Godavari		Private (For Profit)	Polytrauma,Neurosurgery,Interventional Neuroradiology,Urology,Orthopaedics,Obstetrics & Gynaecology,Otorhinolaryngology,General Surgery	NA
Andhra Pradesh	Trust	Guntur		Private (For Profit)	General Medicine,Paediatric medical management,Neurosurgery,Urology,Emergency Room Packages,Polytrauma,Paediatric surgery,Orthopaedics,Obstetrics & Gynaecology,Otorhinolaryngology,General Surgery	NA
Andhra Pradesh	Trust	Kurnool		Private (For Profit)	Paediatric medical management,General Medicine,Emergency Room Packages,Polytrauma,Plastic & reconstructive,Burns management,Neurosurgery,Interventional Neuroradiology,Urology,Paediatric surgery,Orthopaedics,Otorhinolaryngology,General Surgery	NA
Andhra Pradesh	Trust	Chittoor		Private (For Profit)	General Medicine,Urology,Cardiology,Polytrauma,Plastic & reconstructive,Burns management,Neurosurgery,Interventional Neuroradiology,Cardio-thoracic & Vascular surgery,Orthopaedics	NA
Andhra Pradesh	Trust	Y.S.R.		Private (For Profit)	Paediatric medical management,General Medicine,Emergency Room Packages,Plastic & reconstructive,Burns management,Paediatric surgery,Obstetrics & Gynaecology,Otorhinolaryngology,General Surgery	NA
Andhra Pradesh	Trust	Chittoor		Private (For Profit)	General Medicine,Emergency Room Packages,Polytrauma,Plastic & reconstructive,Burns management,Neurosurgery,Interventional Neuroradiology,Orthopaedics	NA
Andhra Pradesh	Trust	Kurnool		Private (For Profit)	General Medicine,Urology,Paediatric medical management,Emergency Room Packages,Polytrauma,Plastic & reconstructive,Burns management,Neurosurgery,Interventional Neuroradiology,Paediatric surgery,Orthopaedics,Obstetrics & Gynaecology,Otorhinolaryngology,General Surgery	NA
Andhra Pradesh	Trust	Prakasam		Private (For Profit)	Polytrauma,Orthopaedics,Obstetrics & Gynaecology,Opthalmology,General Surgery	NA
Andhra Pradesh	Trust	West Godavari		Private (For Profit)	Opthalmology	NA
Andhra Pradesh	Trust	East Godavari		Private (For Profit)	General Medicine,Paediatric medical management,Neurosurgery,Urology,Emergency Room Packages,Polytrauma,Plastic & reconstructive,Burns management,Interventional Neuroradiology,Paediatric surgery,Orthopaedics,Obstetrics & Gynaecology,Otorhinolaryngology,General Surgery	NA
Andhra Pradesh	Trust	Chittoor		Private (For Profit)	Opthalmology	NA
Andhra Pradesh	Trust	Kurnool		Private (For Profit)	Paediatric medical management,General Medicine,Emergency Room Packages,Paediatric surgery,Obstetrics & Gynaecology,General Surgery	NA
Andhra Pradesh	Trust	West Godavari		Private (For Profit)	Polytrauma,Orthopaedics,Obstetrics & Gynaecology,General Surgery	NA
Andhra Pradesh	Trust	Visakhapatanam		Private (For Profit)	Paediatric medical management,Polytrauma,Orthopaedics,General Surgery	NA
Andhra Pradesh	Trust	Prakasam		Private (For Profit)	Polytrauma,Orthopaedics	NA
Andhra Pradesh	Trust	Chittoor		Private (For Profit)	Opthalmology	NA
Andhra Pradesh	Trust	Kurnool		Private (For Profit)	General Medicine,Urology,Paediatric medical management,Emergency Room Packages,Polytrauma,Paediatric surgery,Orthopaedics,Obstetrics & Gynaecology,Opthalmology,Otorhinolaryngology,General Surgery	NA
Andhra Pradesh	Trust	Guntur		Private (For Profit)	Polytrauma,Urology,Orthopaedics,Obstetrics & Gynaecology,Otorhinolaryngology,General Surgery	NA
Andhra Pradesh	Trust	Anantapur		Private (For Profit)	Paediatric medical management,General Medicine,Emergency Room Packages,Polytrauma,Orthopaedics,Obstetrics & Gynaecology,Opthalmology,Otorhinolaryngology,General Surgery	NA
Andhra Pradesh	Trust	Kurnool		Private (For Profit)	General Medicine,Emergency Room Packages,Polytrauma,Orthopaedics,Obstetrics & Gynaecology,Otorhinolaryngology,General Surgery	NA
Andhra Pradesh	Trust	Guntur		Private (For Profit)	General Medicine,Paediatric medical management,Neurosurgery,Urology,Cardiology,Emergency Room Packages,Polytrauma,Interventional Neuroradiology,Cardio-thoracic & Vascular surgery,Orthopaedics,Obstetrics & Gynaecology,General Surgery	NA
Andhra Pradesh	Trust	Guntur		Private (For Profit)	General Medicine,Paediatric medical management,Neurosurgery,Urology,Emergency Room Packages,Polytrauma,Plastic & reconstructive,Burns management,Interventional Neuroradiology,Orthopaedics,Obstetrics & Gynaecology,Otorhinolaryngology,General Surgery	NA
Andhra Pradesh	Trust	Krishna		Private (For Profit)	Cardiology,General Medicine,Emergency Room Packages,Cardio-thoracic & Vascular surgery	NA
Andhra Pradesh	Trust	Visakhapatanam		Private (For Profit)	Polytrauma,Orthopaedics,General Surgery	NA
Andhra Pradesh	Trust	Anantapur		Private (For Profit)	Opthalmology	NA
Andhra Pradesh	Trust	Y.S.R.		Private (For Profit)	General Medicine,Paediatric medical management,Neurosurgery,Urology,Cardiology,Polytrauma,Interventional Neuroradiology,Cardio-thoracic & Vascular surgery,Orthopaedics,Obstetrics & Gynaecology,General Surgery	NA
Andhra Pradesh	Trust	West Godavari		Private (For Profit)	Polytrauma,Orthopaedics	NA
Andhra Pradesh	Trust	Guntur		Private (For Profit)	General Medicine,Urology	NA
Andhra Pradesh	Trust	East Godavari		Private (For Profit)	General Medicine,Urology	NA
Andhra Pradesh	Trust	Kurnool		Private (For Profit)	General Medicine,Urology	NA
Andhra Pradesh	Trust	Srikakulam		Private (For Profit)	General Medicine,Urology	NA
Andhra Pradesh	Trust	Visakhapatanam		Private (For Profit)	Polytrauma,Urology,Orthopaedics,General Surgery	NA
Andhra Pradesh	Trust	Chittoor		Private (For Profit)	General Medicine,Urology	NA
Andhra Pradesh	Trust	Krishna		Private (For Profit)	General Medicine,Urology	NA
Andhra Pradesh	Trust	Visakhapatanam		Private (For Profit)	General Medicine,Urology	NA
Andhra Pradesh	Trust	Visakhapatanam		Private (For Profit)	General Medicine,Urology	NA
Andhra Pradesh	Trust	Guntur		Private (For Profit)	Opthalmology	NA
Andhra Pradesh	Trust	Krishna		Private (For Profit)	Opthalmology	NA
Andhra Pradesh	Trust	Chittoor		Private (For Profit)	Opthalmology	NA
Andhra Pradesh	Trust	Visakhapatanam		Private (For Profit)	General Medicine,Urology,Emergency Room Packages,Polytrauma,Orthopaedics,Obstetrics & Gynaecology,General Surgery	NA
Andhra Pradesh	Trust	East Godavari		Private (For Profit)	General Medicine,Emergency Room Packages,Polytrauma,Urology,Orthopaedics,Obstetrics & Gynaecology,Otorhinolaryngology,General Surgery	NA
Andhra Pradesh	Trust	Visakhapatanam		Private (For Profit)	Opthalmology	NA
Andhra Pradesh	Trust	Guntur		Private (For Profit)	Radiation Oncology,Medical Oncology,Surgical Oncology	NA
Andhra Pradesh	Trust	West Godavari		Private (For Profit)	Polytrauma,Orthopaedics	NA
Andhra Pradesh	Trust	Guntur		Private (For Profit)	Paediatric cancer,Otorhinolaryngology	NA
Andhra Pradesh	Trust	West Godavari		Private (For Profit)	Paediatric medical management,Polytrauma,Urology,Orthopaedics,Obstetrics & Gynaecology,General Surgery	NA
Andhra Pradesh	Trust	Y.S.R.		Private (For Profit)	Polytrauma,Orthopaedics,Opthalmology,General Surgery	NA
Andhra Pradesh	Trust	West Godavari		Private (For Profit)	General Medicine,Paediatric medical management,Neurosurgery,Urology,Cardiology,Emergency Room Packages,Polytrauma,Plastic & reconstructive,Burns management,Interventional Neuroradiology,Paediatric surgery,Cardio-thoracic & Vascular surgery,Orthopaedics,Obstetrics & Gynaecology,General Surgery	NA
Andhra Pradesh	Trust	East Godavari		Private (For Profit)	Polytrauma,Neurosurgery,Interventional Neuroradiology,Urology,Orthopaedics,Otorhinolaryngology	NA
Andhra Pradesh	Trust	East Godavari		Private (For Profit)	Paediatric medical management,Polytrauma,Plastic & reconstructive,Burns management,Neurosurgery,Interventional Neuroradiology,Urology,Paediatric surgery,Orthopaedics,General Surgery	NA
Andhra Pradesh	Trust	Krishna		Private (For Profit)	Cardiology,Polytrauma,Cardio-thoracic & Vascular surgery,Orthopaedics	NA
Andhra Pradesh	Trust	East Godavari		Private (For Profit)	General Medicine,Urology,Cardiology,Emergency Room Packages,Polytrauma,Neurosurgery,Interventional Neuroradiology,Cardio-thoracic & Vascular surgery,Orthopaedics,General Surgery	NA
Andhra Pradesh	Trust	Guntur		Private (For Profit)	General Medicine,Urology,Cardiology,Paediatric medical management,Emergency Room Packages,Polytrauma,Plastic & reconstructive,Burns management,Radiation Oncology,Medical Oncology,Surgical Oncology,Neurosurgery,Interventional Neuroradiology,Paediatric surgery,Cardio-thoracic & Vascular surgery,Orthopaedics,Obstetrics & Gynaecology,Opthalmology,Otorhinolaryngology,General Surgery	NA
Andhra Pradesh	Trust	Ramgarh		Private (For Profit)	Polytrauma,Plastic & reconstructive,Burns management,Orthopaedics,Obstetrics & Gynaecology,General Surgery	NA
Andhra Pradesh	Trust	Prakasam		Private (For Profit)	Paediatric medical management,Polytrauma,Orthopaedics,Obstetrics & Gynaecology,Opthalmology,Otorhinolaryngology,General Surgery	NA
Andhra Pradesh	Trust	Anantapur		Private (For Profit)	Opthalmology	NA
Andhra Pradesh	Trust	East Godavari		Private (For Profit)	Polytrauma,Orthopaedics,Obstetrics & Gynaecology,General Surgery	NA
Andhra Pradesh	Trust	East Godavari		Private (For Profit)	General Medicine,Urology,Cardiology,Emergency Room Packages,Polytrauma,Plastic & reconstructive,Burns management,Neurosurgery,Interventional Neuroradiology,Cardio-thoracic & Vascular surgery,Orthopaedics,Otorhinolaryngology,General Surgery	NA
Andhra Pradesh	Trust	Krishna		Private (For Profit)	General Medicine,Paediatric medical management,Neurosurgery,Emergency Room Packages,Polytrauma,Interventional Neuroradiology,Urology,Orthopaedics,Obstetrics & Gynaecology,General Surgery	NA
Andhra Pradesh	Trust	Vizianagaram		Private (For Profit)	Paediatric medical management,Polytrauma,Paediatric surgery,Orthopaedics,Obstetrics & Gynaecology,Otorhinolaryngology,General Surgery	NA
Andhra Pradesh	Trust	Krishna		Private (For Profit)	Radiation Oncology,Medical Oncology,Surgical Oncology,General Surgery	NA
Andhra Pradesh	Trust	Krishna		Private (For Profit)	General Medicine,Paediatric medical management,Neurosurgery,Cardiology,Emergency Room Packages,Polytrauma,Plastic & reconstructive,Burns management,Interventional Neuroradiology,Urology,Cardio-thoracic & Vascular surgery,Orthopaedics,Obstetrics & Gynaecology,General Surgery	NA
Andhra Pradesh	Trust	Guntur		Private (For Profit)	General Medicine,Cardiology,Cardio-thoracic & Vascular surgery	NA
Andhra Pradesh	Trust	Guntur		Private (For Profit)	General Medicine,Paediatric medical management,Neurosurgery,Cardiology,Emergency Room Packages,Polytrauma,Interventional Neuroradiology,Urology,Cardio-thoracic & Vascular surgery,Orthopaedics,Obstetrics & Gynaecology,Opthalmology,Otorhinolaryngology,General Surgery	NA
Andhra Pradesh	Trust	Anantapur		Private (For Profit)	General Medicine,Urology,Paediatric medical management,Polytrauma,Plastic & reconstructive,Burns management,Paediatric surgery,Orthopaedics,Obstetrics & Gynaecology,General Surgery	NA
Andhra Pradesh	Trust	Krishna		Private (For Profit)	Polytrauma,Neurosurgery,Interventional Neuroradiology,Urology,Orthopaedics,General Surgery	NA
Andhra Pradesh	Trust	Visakhapatanam		Private (For Profit)	General Medicine,Paediatric medical management,Neurosurgery,Urology,Emergency Room Packages,Polytrauma,Plastic & reconstructive,Burns management,Interventional Neuroradiology,Paediatric surgery,Orthopaedics,Obstetrics & Gynaecology,Otorhinolaryngology,General Surgery	NA
Andhra Pradesh	Trust	Spsr Nellore		Private (For Profit)	General Medicine,Emergency Room Packages,Polytrauma,Orthopaedics,Obstetrics & Gynaecology,General Surgery	NA
Andhra Pradesh	Trust	Krishna		Private (For Profit)	General Medicine,Paediatric medical management,Neurosurgery,Urology,Cardiology,Emergency Room Packages,Polytrauma,Interventional Neuroradiology,Paediatric surgery,Cardio-thoracic & Vascular surgery,Orthopaedics,Obstetrics & Gynaecology,Otorhinolaryngology,General Surgery	NA
Andhra Pradesh	Trust	Chittoor		Private (For Profit)	Opthalmology	NA
Andhra Pradesh	Trust	Prakasam		Private (For Profit)	General Medicine,Emergency Room Packages,Polytrauma,Urology,Orthopaedics,Otorhinolaryngology,General Surgery	NA
Andhra Pradesh	Trust	Prakasam		Private (For Profit)	Paediatric medical management,Paediatric surgery	NA
Andhra Pradesh	Trust	West Godavari		Private (For Profit)	General Medicine,Paediatric medical management,Emergency Room Packages,Polytrauma,Urology,Paediatric surgery,Orthopaedics,Obstetrics & Gynaecology,Otorhinolaryngology,General Surgery	NA
Andhra Pradesh	Trust	Kurnool		Private (For Profit)	Paediatric medical management,Paediatric surgery	NA
Andhra Pradesh	Trust	Krishna		Private (For Profit)	Opthalmology	NA
Andhra Pradesh	Trust	East Godavari		Private (For Profit)	General Medicine,Paediatric medical management,Neurosurgery,Emergency Room Packages,Polytrauma,Interventional Neuroradiology,Urology,Orthopaedics,Obstetrics & Gynaecology,Otorhinolaryngology,General Surgery	NA
Andhra Pradesh	Trust	Anantapur		Private (For Profit)	General Medicine,Emergency Room Packages,Polytrauma,Plastic & reconstructive,Burns management,Urology,Orthopaedics,Obstetrics & Gynaecology,Otorhinolaryngology,General Surgery	NA
Andhra Pradesh	Trust	East Godavari		Private (For Profit)	Polytrauma,Orthopaedics,Obstetrics & Gynaecology,General Surgery	NA
Andhra Pradesh	Trust	Prakasam		Private (For Profit)	Cardiology,Cardio-thoracic & Vascular surgery	NA
Andhra Pradesh	Trust	Guntur		Private (For Profit)	Polytrauma,Neurosurgery,Interventional Neuroradiology,Urology,Orthopaedics,Obstetrics & Gynaecology,Otorhinolaryngology,General Surgery	NA
Andhra Pradesh	Trust	Spsr Nellore		Private (For Profit)	General Medicine,Emergency Room Packages,Polytrauma,Orthopaedics,Obstetrics & Gynaecology,General Surgery	NA
Andhra Pradesh	Trust	Ramgarh		Private (For Profit)	General Medicine,Emergency Room Packages,Polytrauma,Orthopaedics,Otorhinolaryngology,General Surgery	NA
Andhra Pradesh	Trust	Kurnool		Private (For Profit)	General Medicine,Emergency Room Packages,Polytrauma,Urology,Orthopaedics,Obstetrics & Gynaecology,Otorhinolaryngology,General Surgery	NA
Andhra Pradesh	Trust	Guntur		Private (For Profit)	General Medicine,Paediatric medical management,Neurosurgery,Emergency Room Packages,Paediatric surgery,Obstetrics & Gynaecology,Otorhinolaryngology,General Surgery	NA
Andhra Pradesh	Trust	Guntur		Private (For Profit)	Radiation Oncology,Medical Oncology,Surgical Oncology	NA
Andhra Pradesh	Trust	Guntur		Private (For Profit)	Cardiology,General Medicine,Emergency Room Packages,Urology,Cardio-thoracic & Vascular surgery,General Surgery	NA
Andhra Pradesh	Trust	Anantapur		Private (For Profit)	Polytrauma,Plastic & reconstructive,Burns management,Neurosurgery,Interventional Neuroradiology,Orthopaedics	NA
Andhra Pradesh	Trust	Guntur		Private (For Profit)	Polytrauma,Urology,Paediatric surgery,Orthopaedics,Obstetrics & Gynaecology,Otorhinolaryngology,General Surgery	NA
Andhra Pradesh	Trust	East Godavari		Private (For Profit)	Polytrauma,Orthopaedics,Otorhinolaryngology,General Surgery	NA
Andhra Pradesh	Trust	Prakasam		Private (For Profit)	Polytrauma,Neurosurgery,Interventional Neuroradiology,Urology,Orthopaedics,General Surgery	NA
Andhra Pradesh	Trust	Y.S.R.		Private (For Profit)	General Medicine,Urology	NA
Andhra Pradesh	Trust	Prakasam		Private (For Profit)	General Medicine,Urology	NA
Andhra Pradesh	Trust	Guntur		Private (For Profit)	General Medicine,Paediatric medical management,Neurosurgery,Polytrauma,Interventional Neuroradiology,Urology,Orthopaedics,General Surgery	NA
Andhra Pradesh	Trust	Guntur		Private (For Profit)	General Medicine,Paediatric medical management,Emergency Room Packages,Polytrauma,Plastic & reconstructive,Burns management,Neurosurgery,Interventional Neuroradiology,Urology,Paediatric surgery,Orthopaedics,Obstetrics & Gynaecology,Otorhinolaryngology,General Surgery	NA
Andhra Pradesh	Trust	West Godavari		Private (For Profit)	Opthalmology	NA
Andhra Pradesh	Trust	Visakhapatanam		Private (For Profit)	General Medicine,Paediatric medical management,Neurosurgery,Urology,Cardiology,Polytrauma,Interventional Neuroradiology,Paediatric surgery,Cardio-thoracic & Vascular surgery,Orthopaedics,Obstetrics & Gynaecology,Otorhinolaryngology,General Surgery	NA
Andhra Pradesh	Trust	Spsr Nellore		Private (For Profit)	Opthalmology	NA
Andhra Pradesh	Trust	Kurnool		Private (For Profit)	Polytrauma,Neurosurgery,Interventional Neuroradiology,Urology,Orthopaedics	NA
Andhra Pradesh	Trust	Chittoor		Private (For Profit)	Polytrauma,Orthopaedics,Otorhinolaryngology	NA
Andhra Pradesh	Trust	Guntur		Private (For Profit)	General Medicine,Emergency Room Packages,Polytrauma,Neurosurgery,Interventional Neuroradiology,Urology,Orthopaedics,Otorhinolaryngology,General Surgery	NA
Andhra Pradesh	Trust	Krishna		Private (For Profit)	Opthalmology	NA
Andhra Pradesh	Trust	Krishna		Private (For Profit)	Polytrauma,Neurosurgery,Interventional Neuroradiology,Orthopaedics	NA
Andhra Pradesh	Trust	Guntur		Private (For Profit)	General Medicine,Emergency Room Packages,Polytrauma,Plastic & reconstructive,Burns management,Neurosurgery,Interventional Neuroradiology,Orthopaedics	NA
Andhra Pradesh	Trust	Guntur		Private (For Profit)	Cardiology,Cardio-thoracic & Vascular surgery	NA
Andhra Pradesh	Trust	Krishna		Private (For Profit)	General Medicine,Emergency Room Packages,Polytrauma,Orthopaedics,General Surgery	NA
Andhra Pradesh	Trust	Prakasam		Private (For Profit)	Polytrauma,Orthopaedics,General Surgery	NA
Andhra Pradesh	Trust	West Godavari		Private (For Profit)	General Medicine,Urology,Emergency Room Packages,Polytrauma,Orthopaedics,Obstetrics & Gynaecology,Otorhinolaryngology,General Surgery	NA
Andhra Pradesh	Trust	East Godavari		Private (For Profit)	Cardiology,Polytrauma,Urology,Cardio-thoracic & Vascular surgery,Orthopaedics,Obstetrics & Gynaecology,General Surgery	NA
Andhra Pradesh	Trust	East Godavari		Private (For Profit)	Opthalmology	NA
Andhra Pradesh	Trust	Visakhapatanam		Private (For Profit)	General Medicine,Paediatric medical management,Neurosurgery,Polytrauma,Interventional Neuroradiology,Urology,Paediatric surgery,Orthopaedics,Obstetrics & Gynaecology,Otorhinolaryngology,General Surgery	NA
Andhra Pradesh	Trust	Kurnool		Private (For Profit)	General Medicine,Emergency Room Packages,Polytrauma,Urology,Orthopaedics,Otorhinolaryngology,General Surgery	NA
Andhra Pradesh	Trust	Chittoor		Private (For Profit)	General Medicine,Paediatric medical management,Neurosurgery,Emergency Room Packages,Polytrauma,Interventional Neuroradiology,Urology,Orthopaedics,Obstetrics & Gynaecology,Otorhinolaryngology,General Surgery	NA
Andhra Pradesh	Trust	Kurnool		Private (For Profit)	General Medicine,Emergency Room Packages,Polytrauma,Urology,Orthopaedics,Opthalmology,General Surgery	NA
Andhra Pradesh	Trust	West Godavari		Private (For Profit)	Opthalmology	NA
Andhra Pradesh	Trust	West Godavari		Private (For Profit)	General Medicine,Emergency Room Packages,Polytrauma,Orthopaedics,Obstetrics & Gynaecology,General Surgery	NA
Andhra Pradesh	Trust	Kurnool		Private (For Profit)	General Medicine,Urology,Paediatric medical management,Polytrauma,Plastic & reconstructive,Burns management,Neurosurgery,Interventional Neuroradiology,Paediatric surgery,Orthopaedics,Obstetrics & Gynaecology,Otorhinolaryngology,General Surgery	NA
Andhra Pradesh	Trust	East Godavari		Private (For Profit)	Paediatric medical management,General Medicine,Emergency Room Packages,Polytrauma,Paediatric surgery,Orthopaedics,Obstetrics & Gynaecology,General Surgery	NA
Andhra Pradesh	Trust	East Godavari		Private (For Profit)	Otorhinolaryngology	NA
Andhra Pradesh	Trust	Prakasam		Private (For Profit)	Opthalmology	NA
Andhra Pradesh	Trust	Anantapur		Private (For Profit)	General Medicine,Urology,Polytrauma,Plastic & reconstructive,Burns management,Surgical Oncology,Orthopaedics,Obstetrics & Gynaecology,Otorhinolaryngology,General Surgery	NA
Andhra Pradesh	Trust	East Godavari		Private (For Profit)	Polytrauma,Orthopaedics	NA
Andhra Pradesh	Trust	Prakasam		Private (For Profit)	Plastic & reconstructive,Burns management,Opthalmology	NA
Andhra Pradesh	Trust	Guntur		Private (For Profit)	General Medicine,Paediatric medical management,Neurosurgery,Urology,Cardiology,Emergency Room Packages,Polytrauma,Plastic & reconstructive,Burns management,Radiation Oncology,Medical Oncology,Surgical Oncology,Interventional Neuroradiology,Paediatric surgery,Cardio-thoracic & Vascular surgery,Orthopaedics,Obstetrics & Gynaecology,Opthalmology,Otorhinolaryngology,General Surgery	NA
Andhra Pradesh	Trust	East Godavari		Private (For Profit)	General Medicine,Paediatric medical management,Neurosurgery,Cardiology,Emergency Room Packages,Polytrauma,Interventional Neuroradiology,Urology,Paediatric surgery,Cardio-thoracic & Vascular surgery,Orthopaedics,Obstetrics & Gynaecology,Opthalmology,Otorhinolaryngology,General Surgery	NA
Andhra Pradesh	Trust	East Godavari		Private (For Profit)	General Medicine,Paediatric medical management,Neurosurgery,Urology,Cardiology,Emergency Room Packages,Polytrauma,Plastic & reconstructive,Burns management,Interventional Neuroradiology,Paediatric surgery,Cardio-thoracic & Vascular surgery,Orthopaedics,Obstetrics & Gynaecology,Opthalmology,Otorhinolaryngology,General Surgery	NA
Andhra Pradesh	Trust	Anantapur		Private (For Profit)	General Medicine,Urology,Paediatric medical management,Polytrauma,Plastic & reconstructive,Burns management,Neurosurgery,Interventional Neuroradiology,Paediatric surgery,Orthopaedics,Obstetrics & Gynaecology,Otorhinolaryngology,General Surgery	NA
Andhra Pradesh	Trust	East Godavari		Private (For Profit)	General Medicine,Paediatric medical management,Neurosurgery,Urology,Cardiology,Emergency Room Packages,Polytrauma,Interventional Neuroradiology,Cardio-thoracic & Vascular surgery,Orthopaedics,Obstetrics & Gynaecology,Opthalmology,General Surgery	NA
Andhra Pradesh	Trust	East Godavari		Private (For Profit)	General Medicine,Urology,Cardiology,Emergency Room Packages,Polytrauma,Radiation Oncology,Medical Oncology,Surgical Oncology,Neurosurgery,Interventional Neuroradiology,Paediatric surgery,Cardio-thoracic & Vascular surgery,Orthopaedics,Obstetrics & Gynaecology,Otorhinolaryngology,General Surgery	NA
Andhra Pradesh	Trust	Srikakulam		Private (For Profit)	General Medicine,Urology,Cardiology,Paediatric medical management,Emergency Room Packages,Polytrauma,Neurosurgery,Interventional Neuroradiology,Cardio-thoracic & Vascular surgery,Orthopaedics,Obstetrics & Gynaecology,Otorhinolaryngology,General Surgery	NA
Andhra Pradesh	Trust	Krishna		Private (For Profit)	General Medicine,Urology,Cardiology,Emergency Room Packages,Polytrauma,Neurosurgery,Interventional Neuroradiology,Cardio-thoracic & Vascular surgery,Orthopaedics,General Surgery	NA
Andhra Pradesh	Trust	Krishna		Private (For Profit)	Polytrauma,Orthopaedics,General Surgery	NA
Andhra Pradesh	Trust	Kurnool		Private (For Profit)	General Medicine,Paediatric medical management,Neurosurgery,Urology,Emergency Room Packages,Polytrauma,Plastic & reconstructive,Burns management,Interventional Neuroradiology,Orthopaedics,Obstetrics & Gynaecology,Opthalmology,Otorhinolaryngology,General Surgery	NA
Andhra Pradesh	Trust	Prakasam		Private (For Profit)	Paediatric medical management,Paediatric surgery	NA
Andhra Pradesh	Trust	Visakhapatanam		Private (For Profit)	General Medicine,Urology,Cardiology,Polytrauma,Cardio-thoracic & Vascular surgery,Orthopaedics,Otorhinolaryngology,General Surgery	NA
Andhra Pradesh	Trust	Visakhapatanam		Private (For Profit)	General Medicine,Paediatric medical management,Neurosurgery,Urology,Emergency Room Packages,Polytrauma,Plastic & reconstructive,Burns management,Interventional Neuroradiology,Paediatric surgery,Orthopaedics,Obstetrics & Gynaecology,Opthalmology,Otorhinolaryngology,General Surgery	NA
Andhra Pradesh	Trust	Kurnool		Private (For Profit)	General Medicine,Paediatric medical management,Neurosurgery,Urology,Emergency Room Packages,Polytrauma,Plastic & reconstructive,Burns management,Surgical Oncology,Interventional Neuroradiology,Paediatric surgery,Orthopaedics,Obstetrics & Gynaecology,Otorhinolaryngology,General Surgery	NA
Andhra Pradesh	Trust	Krishna		Private (For Profit)	General Medicine,Urology,Cardiology,Polytrauma,Neurosurgery,Interventional Neuroradiology,Cardio-thoracic & Vascular surgery,Orthopaedics	NA
Andhra Pradesh	Trust	Srikakulam		Private (For Profit)	General Medicine,Urology,Paediatric medical management,Emergency Room Packages,Polytrauma,Neurosurgery,Interventional Neuroradiology,Paediatric surgery,Orthopaedics,Obstetrics & Gynaecology,Otorhinolaryngology,General Surgery	NA
Andhra Pradesh	Trust	Spsr Nellore		Private (For Profit)	General Medicine,Urology	NA
Andhra Pradesh	Trust	East Godavari		Private (For Profit)	Cardiology,Cardio-thoracic & Vascular surgery	NA
Andhra Pradesh	Trust	Prakasam		Private (For Profit)	Cardiology,Cardio-thoracic & Vascular surgery	NA
Andhra Pradesh	Trust	Guntur		Private (For Profit)	General Medicine,Paediatric medical management,Neurosurgery,Emergency Room Packages,Polytrauma,Interventional Neuroradiology,Urology,Paediatric surgery,Orthopaedics,Obstetrics & Gynaecology,Otorhinolaryngology,General Surgery	NA
Andhra Pradesh	Trust	Guntur		Private (For Profit)	Polytrauma,Orthopaedics	NA
Andhra Pradesh	Trust	Guntur		Private (For Profit)	Polytrauma,Neurosurgery,Interventional Neuroradiology,Orthopaedics,Obstetrics & Gynaecology	NA
Andhra Pradesh	Trust	Vizianagaram		Private (For Profit)	General Medicine,Paediatric medical management,Neurosurgery,Urology,Cardiology,Emergency Room Packages,Polytrauma,Plastic & reconstructive,Burns management,Interventional Neuroradiology,Paediatric surgery,Cardio-thoracic & Vascular surgery,Orthopaedics,Obstetrics & Gynaecology,Opthalmology,Otorhinolaryngology,General Surgery	NA
Andhra Pradesh	Trust	Krishna		Private (For Profit)	General Medicine,Paediatric medical management,Neurosurgery,Urology,Emergency Room Packages,Polytrauma,Plastic & reconstructive,Burns management,Interventional Neuroradiology,Orthopaedics,Obstetrics & Gynaecology,Otorhinolaryngology,General Surgery	NA
Andhra Pradesh	Trust	Guntur		Private (For Profit)	General Medicine,Emergency Room Packages,Polytrauma,Plastic & reconstructive,Burns management,Neurosurgery,Interventional Neuroradiology,Orthopaedics,Obstetrics & Gynaecology,General Surgery	NA
Andhra Pradesh	Trust	East Godavari		Private (For Profit)	General Medicine,Paediatric medical management,Neurosurgery,Urology,Cardiology,Emergency Room Packages,Polytrauma,Plastic & reconstructive,Burns management,Interventional Neuroradiology,Paediatric surgery,Cardio-thoracic & Vascular surgery,Orthopaedics,Obstetrics & Gynaecology,General Surgery	NA
Andhra Pradesh	Trust	Vizianagaram		Private (For Profit)	Polytrauma,Orthopaedics,Obstetrics & Gynaecology,General Surgery	NA
Andhra Pradesh	Trust	West Godavari		Private (For Profit)	General Medicine,Paediatric medical management,Neurosurgery,Urology,Cardiology,Emergency Room Packages,Polytrauma,Plastic & reconstructive,Burns management,Interventional Neuroradiology,Paediatric surgery,Cardio-thoracic & Vascular surgery,Orthopaedics,Obstetrics & Gynaecology,Otorhinolaryngology,General Surgery	NA
Andhra Pradesh	Trust	Krishna		Private (For Profit)	Paediatric medical management,Paediatric surgery	NA
Andhra Pradesh	Trust	Anantapur		Private (For Profit)	General Medicine,Emergency Room Packages,Polytrauma,Surgical Oncology,Neurosurgery,Interventional Neuroradiology,Urology,Orthopaedics,Obstetrics & Gynaecology,Otorhinolaryngology,General Surgery	NA
Andhra Pradesh	Trust	Visakhapatanam		Private (For Profit)	General Medicine,Urology,Polytrauma,Orthopaedics,Obstetrics & Gynaecology,General Surgery	NA
Andhra Pradesh	Trust	Y.S.R.		Private (For Profit)	General Medicine,Paediatric medical management,Neurosurgery,Emergency Room Packages,Polytrauma,Plastic & reconstructive,Burns management,Interventional Neuroradiology,Urology,Orthopaedics,Obstetrics & Gynaecology,Opthalmology,Otorhinolaryngology,General Surgery	NA
Andhra Pradesh	Trust	Vizianagaram		Private (For Profit)	Opthalmology	NA
Andhra Pradesh	Trust	Prakasam		Private (For Profit)	Radiation Oncology,Medical Oncology,Surgical Oncology,General Surgery	NA
Andhra Pradesh	Trust	Anantapur		Private (For Profit)	General Medicine,Paediatric medical management,Neurosurgery,Urology,Cardiology,Emergency Room Packages,Polytrauma,Paediatric surgery,Orthopaedics,Obstetrics & Gynaecology,Otorhinolaryngology,General Surgery	NA
Andhra Pradesh	Trust	Anantapur		Private (For Profit)	General Medicine,Paediatric medical management,Neurosurgery,Urology,Cardiology,Emergency Room Packages,Polytrauma,Plastic & reconstructive,Burns management,Interventional Neuroradiology,Paediatric surgery,Cardio-thoracic & Vascular surgery,Orthopaedics,Obstetrics & Gynaecology,Otorhinolaryngology,General Surgery	NA
Andhra Pradesh	Trust	Prakasam		Private (For Profit)	General Medicine,Urology,Paediatric medical management,Emergency Room Packages,Polytrauma,Orthopaedics,Obstetrics & Gynaecology,General Surgery	NA
Andhra Pradesh	Trust	Chittoor		Private (For Profit)	General Medicine,Emergency Room Packages,Polytrauma,Urology,Orthopaedics	NA
Andhra Pradesh	Trust	Kurnool		Private (For Profit)	General Medicine,Urology,Cardiology,Paediatric medical management,Emergency Room Packages,Polytrauma,Plastic & reconstructive,Burns management,Neurosurgery,Interventional Neuroradiology,Paediatric surgery,Cardio-thoracic & Vascular surgery,Orthopaedics,Obstetrics & Gynaecology,Otorhinolaryngology,General Surgery	NA
Andhra Pradesh	Trust	Guntur		Private (For Profit)	General Medicine,Emergency Room Packages,Polytrauma,Urology,Orthopaedics,Obstetrics & Gynaecology,Otorhinolaryngology,General Surgery	NA
Andhra Pradesh	Trust	Krishna		Private (For Profit)	General Medicine,Paediatric medical management,Neurosurgery,Urology,Emergency Room Packages,Polytrauma,Interventional Neuroradiology,Paediatric surgery,Orthopaedics,Obstetrics & Gynaecology,Otorhinolaryngology,General Surgery	NA
Andhra Pradesh	Trust	Prakasam		Private (For Profit)	Paediatric medical management,Paediatric surgery,Obstetrics & Gynaecology	NA
Andhra Pradesh	Trust	Krishna		Private (For Profit)	General Medicine,Urology,Paediatric medical management,Polytrauma,Plastic & reconstructive,Burns management,Surgical Oncology,Neurosurgery,Interventional Neuroradiology,Orthopaedics,Otorhinolaryngology,General Surgery	NA
Andhra Pradesh	Trust	East Godavari		Private (For Profit)	Polytrauma,Orthopaedics	NA
Andhra Pradesh	Trust	East Godavari		Private (For Profit)	General Medicine,Urology,Polytrauma,Orthopaedics,General Surgery	NA
Andhra Pradesh	Trust	Chittoor		Private (For Profit)	General Medicine,Paediatric medical management,Neurosurgery,Urology,Emergency Room Packages,Polytrauma,Plastic & reconstructive,Burns management,Interventional Neuroradiology,Paediatric surgery,Orthopaedics,Obstetrics & Gynaecology,Opthalmology,Otorhinolaryngology,General Surgery	NA
Andhra Pradesh	Trust	Krishna		Private (For Profit)	General Medicine,Urology,Paediatric medical management,Emergency Room Packages,Polytrauma,Plastic & reconstructive,Burns management,Neurosurgery,Interventional Neuroradiology,Paediatric surgery,Orthopaedics,Obstetrics & Gynaecology,Otorhinolaryngology,General Surgery	NA
Andhra Pradesh	Trust	Kurnool		Private (For Profit)	Paediatric medical management,Polytrauma,Orthopaedics,Obstetrics & Gynaecology	NA
Andhra Pradesh	Trust	Chittoor		Private (For Profit)	General Medicine,Urology,Emergency Room Packages,Polytrauma,Plastic & reconstructive,Burns management,Neurosurgery,Interventional Neuroradiology,Orthopaedics,Opthalmology,Otorhinolaryngology,General Surgery	NA
Andhra Pradesh	Trust	Spsr Nellore		Private (For Profit)	General Medicine,Paediatric medical management,Neurosurgery,Urology,Cardiology,Emergency Room Packages,Polytrauma,Cardio-thoracic & Vascular surgery,Orthopaedics,Obstetrics & Gynaecology,Opthalmology,Otorhinolaryngology,General Surgery	NA
Andhra Pradesh	Trust	Vizianagaram		Private (For Profit)	Paediatric medical management,Paediatric surgery	NA
Andhra Pradesh	Trust	Kurnool		Private (For Profit)	Cardiology,Cardio-thoracic & Vascular surgery	NA
Andhra Pradesh	Trust	Kurnool		Private (For Profit)	General Medicine,Emergency Room Packages,Polytrauma,Plastic & reconstructive,Burns management,Urology,Orthopaedics,Otorhinolaryngology,General Surgery	NA
Andhra Pradesh	Trust	West Godavari		Private (For Profit)	General Medicine,Paediatric medical management,Neurosurgery,Urology,Cardiology,Emergency Room Packages,Polytrauma,Plastic & reconstructive,Burns management,Interventional Neuroradiology,Paediatric surgery,Cardio-thoracic & Vascular surgery,Orthopaedics,Obstetrics & Gynaecology,Opthalmology,Otorhinolaryngology,General Surgery	NA
Andhra Pradesh	Trust	Spsr Nellore		Private (For Profit)	General Medicine,Urology,Paediatric medical management,Emergency Room Packages,Polytrauma,Orthopaedics,Obstetrics & Gynaecology,General Surgery	NA
Andhra Pradesh	Trust	Prakasam		Private (For Profit)	Paediatric medical management,Paediatric surgery,Obstetrics & Gynaecology	NA
Andhra Pradesh	Trust	Kurnool		Private (For Profit)	Paediatric medical management,Paediatric surgery,Obstetrics & Gynaecology,Opthalmology,General Surgery	NA
Andhra Pradesh	Trust	Visakhapatanam		Private (For Profit)	General Medicine,Paediatric medical management,Neurosurgery,Urology,Emergency Room Packages,Polytrauma,Plastic & reconstructive,Burns management,Interventional Neuroradiology,Orthopaedics,Obstetrics & Gynaecology,Otorhinolaryngology,General Surgery	NA
Andhra Pradesh	Trust	Guntur		Private (For Profit)	Paediatric medical management,General Medicine,Emergency Room Packages,Polytrauma,Urology,Orthopaedics,Obstetrics & Gynaecology,Opthalmology,Otorhinolaryngology,General Surgery	NA
Andhra Pradesh	Trust	Anantapur		Private (For Profit)	Polytrauma,Orthopaedics,Otorhinolaryngology,General Surgery	NA
Andhra Pradesh	Trust	Prakasam		Private (For Profit)	General Medicine,Urology	NA
Andhra Pradesh	Trust	Chittoor		Private (For Profit)	General Medicine,Urology,Paediatric medical management,Emergency Room Packages,Polytrauma,Plastic & reconstructive,Burns management,Orthopaedics,Obstetrics & Gynaecology,Otorhinolaryngology,General Surgery	NA
Andhra Pradesh	Trust	Spsr Nellore		Private (For Profit)	General Medicine,Urology,Cardiology,Polytrauma,Neurosurgery,Interventional Neuroradiology,Cardio-thoracic & Vascular surgery,Orthopaedics,General Surgery	NA
Andhra Pradesh	Trust	Visakhapatanam		Private (For Profit)	General Medicine,Paediatric medical management,Neurosurgery,Urology,Emergency Room Packages,Interventional Neuroradiology	NA
Andhra Pradesh	Trust	Krishna		Private (For Profit)	General Medicine,Paediatric medical management,Neurosurgery,Urology,Cardiology,Emergency Room Packages,Polytrauma,Plastic & reconstructive,Burns management,Interventional Neuroradiology,Paediatric surgery,Cardio-thoracic & Vascular surgery,Orthopaedics,Obstetrics & Gynaecology,Otorhinolaryngology,General Surgery	NA
Andhra Pradesh	Trust	Prakasam		Private (For Profit)	General Medicine,Urology,Cardiology,Emergency Room Packages,Polytrauma,Plastic & reconstructive,Burns management,Neurosurgery,Interventional Neuroradiology,Cardio-thoracic & Vascular surgery,Orthopaedics,Otorhinolaryngology,General Surgery	NA
Andhra Pradesh	Trust	Rajkot		Private (For Profit)	General Medicine,Paediatric medical management,Emergency Room Packages,Polytrauma,Orthopaedics,Obstetrics & Gynaecology,Opthalmology,General Surgery	NA
Andhra Pradesh	Trust	Chittoor		Private (For Profit)	General Medicine,Urology,Cardiology,Polytrauma,Radiation Oncology,Medical Oncology,Surgical Oncology,Cardio-thoracic & Vascular surgery,Orthopaedics	NA
Andhra Pradesh	Trust	Guntur		Private (For Profit)	General Medicine,Urology,Paediatric medical management,Emergency Room Packages,Polytrauma,Plastic & reconstructive,Burns management,Neurosurgery,Interventional Neuroradiology,Orthopaedics,Otorhinolaryngology,General Surgery	NA
Andhra Pradesh	Trust	Srikakulam		Private (For Profit)	General Medicine,Paediatric medical management,Neurosurgery,Urology,Cardiology,Emergency Room Packages,Polytrauma,Plastic & reconstructive,Burns management,Interventional Neuroradiology,Paediatric surgery,Cardio-thoracic & Vascular surgery,Orthopaedics,Obstetrics & Gynaecology,Opthalmology,Otorhinolaryngology,General Surgery	NA
Andhra Pradesh	Trust	Kurnool		Private (For Profit)	Polytrauma,Orthopaedics	NA
Andhra Pradesh	Trust	Visakhapatanam		Private (For Profit)	General Medicine,Emergency Room Packages,Polytrauma,Neurosurgery,Interventional Neuroradiology,Urology,Orthopaedics,Otorhinolaryngology	NA
Andhra Pradesh	Trust	Guntur		Private (For Profit)	Radiation Oncology,Medical Oncology,Surgical Oncology,General Surgery	NA
Andhra Pradesh	Trust	Visakhapatanam		Private (For Profit)	General Medicine,Urology,Cardiology,Paediatric medical management,Polytrauma,Paediatric surgery,Cardio-thoracic & Vascular surgery,Orthopaedics,General Surgery	NA
Andhra Pradesh	Trust	Bokaro		Private (For Profit)	Paediatric medical management,General Medicine,Emergency Room Packages,Polytrauma,Plastic & reconstructive,Burns management,Orthopaedics,Obstetrics & Gynaecology,Opthalmology,Otorhinolaryngology,General Surgery	NA
Andhra Pradesh	Trust	Kurnool		Private (For Profit)	Polytrauma,Orthopaedics	NA
Andhra Pradesh	Trust	Kurnool		Private (For Profit)	General Medicine,Emergency Room Packages,Polytrauma,Plastic & reconstructive,Burns management,Urology,Orthopaedics,Obstetrics & Gynaecology,Otorhinolaryngology,General Surgery	NA
Andhra Pradesh	Trust	Krishna		Private (For Profit)	General Medicine,Urology,Cardiology,Emergency Room Packages,Polytrauma,Neurosurgery,Interventional Neuroradiology,Cardio-thoracic & Vascular surgery,Orthopaedics,Obstetrics & Gynaecology,Opthalmology,Otorhinolaryngology,General Surgery	NA
Andhra Pradesh	Trust	Visakhapatanam		Private (For Profit)	General Medicine,Urology,Polytrauma,Neurosurgery,Interventional Neuroradiology,Orthopaedics,Obstetrics & Gynaecology	NA
Andhra Pradesh	Trust	Krishna		Private (For Profit)	General Medicine,Paediatric medical management,Neurosurgery,Cardiology,Emergency Room Packages,Interventional Neuroradiology,Urology,Cardio-thoracic & Vascular surgery,Orthopaedics,General Surgery	NA
Andhra Pradesh	Trust	Guntur		Private (For Profit)	Polytrauma,Orthopaedics	NA
Andhra Pradesh	Trust	East Godavari		Private (For Profit)	Opthalmology	NA
Andhra Pradesh	Trust	Prakasam		Private (For Profit)	General Medicine,Paediatric medical management,Neurosurgery,Urology,Cardiology,Emergency Room Packages,Polytrauma,Plastic & reconstructive,Burns management,Interventional Neuroradiology,Paediatric surgery,Cardio-thoracic & Vascular surgery,Orthopaedics,Obstetrics & Gynaecology,Opthalmology,Otorhinolaryngology,General Surgery	NA
Andhra Pradesh	Trust	East Godavari		Private (For Profit)	Paediatric medical management,General Medicine,Emergency Room Packages,Polytrauma,Urology,Paediatric surgery,Orthopaedics,Obstetrics & Gynaecology,Otorhinolaryngology,General Surgery	NA
Andhra Pradesh	Trust	Krishna		Private (For Profit)	Polytrauma,Orthopaedics,General Surgery	NA
Andhra Pradesh	Trust	Guntur		Private (For Profit)	Paediatric cancer,Paediatric surgery,Otorhinolaryngology,General Surgery	NA
Andhra Pradesh	Trust	Visakhapatanam		Private (For Profit)	General Medicine,Paediatric medical management,Neurosurgery,Urology,Emergency Room Packages,Polytrauma,Plastic & reconstructive,Burns management,Interventional Neuroradiology,Paediatric surgery,Orthopaedics,Obstetrics & Gynaecology,Otorhinolaryngology,General Surgery	NA
Andhra Pradesh	Trust	Guntur		Private (For Profit)	General Medicine,Emergency Room Packages,Polytrauma,Urology,Orthopaedics,Obstetrics & Gynaecology,General Surgery	NA
Andhra Pradesh	Trust	Kurnool		Private (For Profit)	General Medicine,Emergency Room Packages,Polytrauma,Urology,Orthopaedics,Obstetrics & Gynaecology,Otorhinolaryngology,General Surgery	NA
Andhra Pradesh	Trust	Anantapur		Private (For Profit)	Polytrauma,Orthopaedics	NA
Andhra Pradesh	Trust	West Godavari		Private (For Profit)	Polytrauma,Orthopaedics,Opthalmology	NA
Andhra Pradesh	Trust	West Godavari		Private (For Profit)	Opthalmology	NA
Andhra Pradesh	Trust	Kurnool		Private (For Profit)	General Medicine,Paediatric medical management,Neurosurgery,Emergency Room Packages,Polytrauma,Interventional Neuroradiology,Paediatric surgery,Orthopaedics,Obstetrics & Gynaecology,Otorhinolaryngology,General Surgery	NA
Andhra Pradesh	Trust	Guntur		Private (For Profit)	Paediatric medical management,Paediatric surgery	NA
Andhra Pradesh	Trust	Vizianagaram		Private (For Profit)	Paediatric medical management,Paediatric surgery,Obstetrics & Gynaecology	NA
Andhra Pradesh	Trust	Prakasam		Private (For Profit)	General Medicine,Urology,Paediatric medical management,Emergency Room Packages,Polytrauma,Paediatric surgery,Orthopaedics,Obstetrics & Gynaecology,Opthalmology,Otorhinolaryngology,General Surgery	NA
Andhra Pradesh	Trust	Vizianagaram		Private (For Profit)	Paediatric medical management,General Medicine,Emergency Room Packages,Polytrauma,Neurosurgery,Interventional Neuroradiology,Urology,Paediatric surgery,Orthopaedics,Obstetrics & Gynaecology,Otorhinolaryngology,General Surgery	NA
Andhra Pradesh	Trust	Chittoor		Private (For Profit)	Paediatric medical management,General Medicine,Emergency Room Packages,Polytrauma,Paediatric surgery,Orthopaedics,Obstetrics & Gynaecology,Opthalmology,Otorhinolaryngology,General Surgery	NA
Andhra Pradesh	Trust	Y.S.R.		Private (For Profit)	Polytrauma,Orthopaedics,Opthalmology,General Surgery	NA
Andhra Pradesh	Trust	Krishna		Private (For Profit)	General Medicine,Urology,Polytrauma,Orthopaedics	NA
Andhra Pradesh	Trust	Krishna		Private (For Profit)	General Medicine,Urology,Cardiology,Paediatric medical management,Polytrauma,Plastic & reconstructive,Burns management,Neurosurgery,Interventional Neuroradiology,Paediatric surgery,Cardio-thoracic & Vascular surgery,Orthopaedics,Obstetrics & Gynaecology,Otorhinolaryngology,General Surgery	NA
Andhra Pradesh	Trust	Anantapur		Private (For Profit)	General Medicine,Urology,Paediatric medical management,Emergency Room Packages,Polytrauma,Plastic & reconstructive,Burns management,Neurosurgery,Interventional Neuroradiology,Paediatric surgery,Orthopaedics,Obstetrics & Gynaecology,Otorhinolaryngology,General Surgery	NA
Andhra Pradesh	Trust	Anantapur		Private (For Profit)	General Medicine,Urology,Emergency Room Packages,Polytrauma,Plastic & reconstructive,Burns management,Surgical Oncology,Orthopaedics,Obstetrics & Gynaecology,General Surgery	NA
Andhra Pradesh	Trust	Chittoor		Private (For Profit)	General Medicine,Emergency Room Packages,Polytrauma,Plastic & reconstructive,Burns management,Urology,Orthopaedics,General Surgery	NA
Andhra Pradesh	Trust	Spsr Nellore		Private (For Profit)	Paediatric medical management,Paediatric surgery	NA
Andhra Pradesh	Trust	East Godavari		Private (For Profit)	Polytrauma,Orthopaedics	NA
Andhra Pradesh	Trust	Guntur		Private (For Profit)	Paediatric medical management,General Medicine,Emergency Room Packages,Polytrauma,Neurosurgery,Interventional Neuroradiology,Urology,Paediatric surgery,Orthopaedics,Obstetrics & Gynaecology,Otorhinolaryngology,General Surgery	NA
Andhra Pradesh	Trust	Anantapur		Private (For Profit)	Opthalmology	NA
Andhra Pradesh	Trust	Anantapur		Private (For Profit)	General Medicine,Emergency Room Packages,Polytrauma,Orthopaedics,Obstetrics & Gynaecology,Otorhinolaryngology,General Surgery	NA
Andhra Pradesh	Trust	Anantapur		Private (For Profit)	General Medicine,Emergency Room Packages,Polytrauma,Orthopaedics,Obstetrics & Gynaecology,Otorhinolaryngology,General Surgery	NA
Andhra Pradesh	Trust	Chittoor		Private (For Profit)	General Medicine,Emergency Room Packages,Polytrauma,Plastic & reconstructive,Burns management,Neurosurgery,Interventional Neuroradiology,Urology,Orthopaedics,Obstetrics & Gynaecology,General Surgery	NA
Andhra Pradesh	Trust	Vizianagaram		Private (For Profit)	General Medicine,Paediatric medical management,Neurosurgery,Urology,Emergency Room Packages,Polytrauma,Orthopaedics,Obstetrics & Gynaecology,Otorhinolaryngology,General Surgery	NA
Andhra Pradesh	Trust	Krishna		Private (For Profit)	General Medicine,Urology,Paediatric medical management,Polytrauma,Orthopaedics,Obstetrics & Gynaecology,Opthalmology,General Surgery	NA
Andhra Pradesh	Trust	Guntur		Private (For Profit)	Paediatric medical management,Polytrauma,Plastic & reconstructive,Burns management,Neurosurgery,Interventional Neuroradiology,Urology,Paediatric surgery,Orthopaedics,Opthalmology,Otorhinolaryngology	NA
Andhra Pradesh	Trust	Prakasam		Private (For Profit)	General Medicine,Urology,Paediatric medical management,Polytrauma,Neurosurgery,Interventional Neuroradiology,Orthopaedics,Obstetrics & Gynaecology,Opthalmology,Otorhinolaryngology,General Surgery	NA
Andhra Pradesh	Trust	Visakhapatanam		Private (For Profit)	Polytrauma,Neurosurgery,Interventional Neuroradiology,Urology,Orthopaedics,Obstetrics & Gynaecology,Otorhinolaryngology,General Surgery	NA
Andhra Pradesh	Trust	Chittoor		Private (For Profit)	Paediatric medical management,General Medicine,Emergency Room Packages,Polytrauma,Urology,Orthopaedics,Obstetrics & Gynaecology,General Surgery	NA
Andhra Pradesh	Trust	Chittoor		Private (For Profit)	General Medicine,Emergency Room Packages,Polytrauma,Plastic & reconstructive,Burns management,Neurosurgery,Interventional Neuroradiology,Urology,Orthopaedics,Otorhinolaryngology,General Surgery	NA
Andhra Pradesh	Trust	Guntur		Private (For Profit)	Radiation Oncology,Medical Oncology,Surgical Oncology	NA
Andhra Pradesh	Trust	West Godavari		Private (For Profit)	Opthalmology	NA
Andhra Pradesh	Trust	Kurnool		Private (For Profit)	Paediatric medical management,Paediatric surgery	NA
Andhra Pradesh	Trust	Guntur		Private (For Profit)	General Medicine,Urology,Cardiology,Polytrauma,Cardio-thoracic & Vascular surgery,Orthopaedics	NA
Andhra Pradesh	Trust	Anantapur		Private (For Profit)	General Medicine,Urology,Emergency Room Packages,Polytrauma,Orthopaedics,Otorhinolaryngology,General Surgery	NA
Andhra Pradesh	Trust	Guntur		Private (For Profit)	Polytrauma,Orthopaedics	NA
Andhra Pradesh	Trust	Anantapur		Private (For Profit)	General Medicine,Urology,Cardiology,Paediatric medical management,Emergency Room Packages,Polytrauma,Plastic & reconstructive,Burns management,Neurosurgery,Interventional Neuroradiology,Cardio-thoracic & Vascular surgery,Orthopaedics,Obstetrics & Gynaecology,Opthalmology,Otorhinolaryngology,General Surgery	NA
Andhra Pradesh	Trust	Guntur		Private (For Profit)	Polytrauma,Orthopaedics,Obstetrics & Gynaecology	NA
Andhra Pradesh	Trust	Y.S.R.		Private (For Profit)	General Medicine,Emergency Room Packages,Polytrauma,Orthopaedics,Otorhinolaryngology,General Surgery	NA
Andhra Pradesh	Trust	Kurnool		Private (For Profit)	General Medicine,Emergency Room Packages,Polytrauma,Urology,Orthopaedics,General Surgery	NA
Andhra Pradesh	Trust	Y.S.R.		Private (For Profit)	Opthalmology	NA
Andhra Pradesh	Trust	Vizianagaram		Private (For Profit)	Paediatric medical management,Polytrauma,Orthopaedics,Obstetrics & Gynaecology,General Surgery	NA
Andhra Pradesh	Trust	Srikakulam		Private (For Profit)	Paediatric medical management,General Medicine,Emergency Room Packages,Polytrauma,Neurosurgery,Interventional Neuroradiology,Urology,Orthopaedics,Obstetrics & Gynaecology,Otorhinolaryngology,General Surgery	NA
Andhra Pradesh	Trust	Visakhapatanam		Private (For Profit)	General Medicine,Paediatric medical management,Neurosurgery,Urology,Emergency Room Packages,Polytrauma,Interventional Neuroradiology,Orthopaedics,General Surgery	NA
Andhra Pradesh	Trust	Prakasam		Private (For Profit)	Polytrauma,Orthopaedics,Obstetrics & Gynaecology,General Surgery	NA
Andhra Pradesh	Trust	Kurnool		Private (For Profit)	Polytrauma,Urology,Paediatric surgery,Orthopaedics,Obstetrics & Gynaecology,Opthalmology,General Surgery,General Medicine,Paediatric medical management,Emergency Room Packages	NA
Arunachal Pradesh	Trust	Papum Pare	MC	Public	General Medicine,Urology,Cardiology,Plastic & reconstructive,Burns management,Medical Oncology,Surgical Oncology,Paediatric surgery,Orthopaedics,Obstetrics & Gynaecology,Opthalmology,Otorhinolaryngology,Neo-natal,Paediatric medical management,Emergency Room Packages,Oral and Maxillofacial Surgery,Polytrauma,General Surgery	NA
Arunachal Pradesh	Trust	East Siang	GH	Public	Neo-natal,Paediatric medical management,General Medicine,Emergency Room Packages,Oral and Maxillofacial Surgery,Paediatric surgery,Orthopaedics,Obstetrics & Gynaecology,Opthalmology,Otorhinolaryngology,General Surgery	NA
Arunachal Pradesh	Trust	Lohit	GH	Public	Neo-natal,Paediatric medical management,General Medicine,Emergency Room Packages,Oral and Maxillofacial Surgery,Orthopaedics,Obstetrics & Gynaecology,Opthalmology,General Surgery	NA
Arunachal Pradesh	Trust	Tawang	DH	Public	General Medicine,Emergency Room Packages,Oral and Maxillofacial Surgery,Orthopaedics,Obstetrics & Gynaecology,Opthalmology	NA
Arunachal Pradesh	Trust	Lohit	Other	Public	General Medicine,Emergency Room Packages	NA
Assam	Trust	Kamrup	MC	Public	Mental Disorders Packages,General Medicine,Emergency Room Packages,Paediatric cancer,Polytrauma,Plastic & reconstructive,Burns management,Radiation Oncology,Medical Oncology,Surgical Oncology,Neurosurgery,Interventional Neuroradiology,Urology,Paediatric surgery,Cardio-thoracic & Vascular surgery,Orthopaedics,Obstetrics & Gynaecology,Opthalmology,Otorhinolaryngology,General Surgery,Paediatric medi…	-NA-
Assam	Trust	Dibrugarh	MC	Public	Mental Disorders Packages,General Medicine,Paediatric medical management,Neurosurgery,Urology,Cardiology,Neo-natal,Emergency Room Packages,Oral and Maxillofacial Surgery,Polytrauma,Plastic & reconstructive,Burns management,Radiation Oncology,Medical Oncology,Surgical Oncology,Interventional Neuroradiology,Paediatric surgery,Cardio-thoracic & Vascular surgery,Orthopaedics,Obstetrics & Gynaecology,…	-NA-
Assam	Trust	Cachar	MC	Public	Mental Disorders Packages,General Medicine,Paediatric medical management,Neurosurgery,Urology,Cardiology,Neo-natal,Emergency Room Packages,Oral and Maxillofacial Surgery,Polytrauma,Plastic & reconstructive,Burns management,Radiation Oncology,Medical Oncology,Surgical Oncology,Interventional Neuroradiology,Paediatric surgery,Cardio-thoracic & Vascular surgery,Orthopaedics,Obstetrics & Gynaecology,…	-NA-
Assam	Trust	Barpeta	MC	Public	Neo-natal,Paediatric medical management,General Medicine,Emergency Room Packages,Orthopaedics,Obstetrics & Gynaecology,General Surgery	-NA-
Assam	Trust	Sonitpur	MC	Public	Mental Disorders Packages,General Medicine,Neo-natal,Paediatric medical management,Emergency Room Packages,Oral and Maxillofacial Surgery,Orthopaedics,Obstetrics & Gynaecology,Opthalmology,Otorhinolaryngology,General Surgery	-NA-
Assam	Trust	Jorhat	MC	Public	General Medicine,Emergency Room Packages,General Surgery,Orthopaedics,Paediatric medical management
Assam	Trust	Kamrup Metro	SH	Public	General Medicine,Emergency Room Packages,Radiation Oncology,Medical Oncology,Surgical Oncology,General Surgery	-NA-
Assam	Trust	Kamrup	SH	Public	General Surgery,Radiation Oncology,Medical Oncology,Surgical Oncology,Paediatric cancer,Otorhinolaryngology
Assam	Trust	Marigaon	DH	Public	Mental Disorders Packages,Neo-natal,Paediatric medical management,General Medicine,Emergency Room Packages,Oral and Maxillofacial Surgery,Polytrauma,Obstetrics & Gynaecology,Opthalmology,Otorhinolaryngology,General Surgery,Otorhinolaryngology
Assam	Trust	Udalguri	DH	Public	Mental Disorders Packages,General Medicine,Emergency Room Packages,Oral and Maxillofacial Surgery,Orthopaedics,Obstetrics & Gynaecology,Opthalmology,Otorhinolaryngology
Assam	Trust	Dhemaji	DH	Public	Oral and Maxillofacial Surgery,Obstetrics & Gynaecology,Opthalmology,Otorhinolaryngology	NA
Assam	Trust	Tinsukia	DH	Public	Mental Disorders Packages,Neo-natal,Paediatric medical management,General Medicine,Emergency Room Packages,Oral and Maxillofacial Surgery,Obstetrics & Gynaecology,Opthalmology,Otorhinolaryngology,General Surgery	NA
Assam	Trust	Karbi Anglong	DH	Public	Mental Disorders Packages,General Medicine,Neo-natal,Paediatric medical management,Emergency Room Packages,Oral and Maxillofacial Surgery,Plastic & reconstructive,Burns management,Urology,Paediatric surgery,Obstetrics & Gynaecology,Opthalmology,Otorhinolaryngology,General Surgery	NA
Assam	Trust	Sonitpur	DH	Public	Paediatric medical management,General Medicine,Emergency Room Packages,Obstetrics & Gynaecology,Opthalmology,Otorhinolaryngology,General Surgery,Mental Disorders Packages,Neo-natal	NA
Assam	Trust	Golaghat	DH	Public	Mental Disorders Packages,Neo-natal,Paediatric medical management,General Medicine,Emergency Room Packages,Oral and Maxillofacial Surgery,Obstetrics & Gynaecology,Opthalmology,Otorhinolaryngology,General Surgery	NA
Assam	Trust	Cachar	DH	Public	Paediatric medical management,General Medicine,Emergency Room Packages,Oral and Maxillofacial Surgery,Obstetrics & Gynaecology,Opthalmology,Otorhinolaryngology,General Surgery	NA
Assam	Trust	Dima Hasao	DH	Public	Paediatric medical management,General Medicine,Emergency Room Packages,Oral and Maxillofacial Surgery,Obstetrics & Gynaecology,Opthalmology,Otorhinolaryngology,General Surgery	NA
Assam	Trust	Sivasagar	DH	Public	Mental Disorders Packages,Neo-natal,Paediatric medical management,General Medicine,Emergency Room Packages,Oral and Maxillofacial Surgery,Orthopaedics,Obstetrics & Gynaecology,Opthalmology,General Surgery,Otorhinolaryngology	NA
Assam	Trust	Bongaigaon	DH	Public	Mental Disorders Packages,Paediatric medical management,General Medicine,Emergency Room Packages,Oral and Maxillofacial Surgery,Orthopaedics,Obstetrics & Gynaecology,Opthalmology,Otorhinolaryngology,General Surgery	NA
Assam	Trust	Kamrup Metro		Private (For Profit)	Cardiology,Cardio-thoracic & Vascular surgery
Assam	Trust	Kamrup Metro		Private (For Profit)	Urology,Cardio-thoracic & Vascular surgery,Neurosurgery,Interventional Neuroradiology,General Medicine,Paediatric medical management,Cardiology	NA
Assam	Trust	Kamrup Metro		Private (For Profit)	Orthopaedics,Plastic & reconstructive,Burns management,Oral and Maxillofacial Surgery,General Medicine,Paediatric medical management,Neurosurgery,General Surgery,Interventional Neuroradiology,Surgical Oncology,Medical Oncology,Emergency Room Packages,Otorhinolaryngology	NA
Assam	Trust	Kamrup Metro		Private (For Profit)	Obstetrics & Gynaecology,Cardiology,Cardio-thoracic & Vascular surgery	NA
Assam	Trust	Kamrup Metro		Private (For Profit)	Cardiology,General Surgery,Otorhinolaryngology,Orthopaedics,Cardio-thoracic & Vascular surgery,Urology,Neurosurgery,Interventional Neuroradiology,Polytrauma,General Medicine,Emergency Room Packages,Paediatric medical management
Assam	Trust	Kamrup Metro		Private (For Profit)	General Surgery,Otorhinolaryngology,Opthalmology,Obstetrics & Gynaecology,Orthopaedics,Cardio-thoracic & Vascular surgery,Paediatric surgery,Urology,Neurosurgery,Interventional Neuroradiology,Medical Oncology,Radiation Oncology,Oral and Maxillofacial Surgery,General Medicine,Emergency Room Packages,Mental Disorders Packages,Cardiology,Paediatric medical management,General Surgery,Otorhinolaryngol…
Assam	Trust	Kamrup Metro		Private (Not for Profit)	Neurosurgery,Interventional Neuroradiology,Surgical Oncology,Medical Oncology,Paediatric cancer,Neo-natal,Cardiology,General Medicine,Urology,Paediatric medical management,Otorhinolaryngology,Opthalmology,General Surgery,Obstetrics & Gynaecology,Orthopaedics,Plastic & reconstructive,Burns management,Polytrauma,Emergency Room Packages,Mental Disorders Packages,General Surgery,Otorhinolaryngology,O…
Assam	Trust	Kamrup Metro		Private (Not for Profit)	Otorhinolaryngology,General Medicine,General Surgery,Obstetrics & Gynaecology,Orthopaedics,Paediatric surgery,Oral and Maxillofacial Surgery,Emergency Room Packages,Paediatric medical management,Mental Disorders Packages,General Surgery,Otorhinolaryngology,Orthopaedics,Cardio-thoracic & Vascular surgery,Urology,Neurosurgery,Interventional Neuroradiology,Polytrauma,General Medicine,Emergency Room …
Assam	Trust	Kamrup Metro		Private (For Profit)	Plastic & reconstructive,Burns management,General Surgery,Otorhinolaryngology,Orthopaedics,Cardio-thoracic & Vascular surgery,Urology,Neurosurgery,Interventional Neuroradiology,Polytrauma,General Medicine,Emergency Room Packages,Paediatric medical management
Assam	Trust	Dibrugarh		Private (For Profit)	Mental Disorders Packages,General Medicine,Paediatric medical management,Neurosurgery,Cardiology,Neo-natal,Emergency Room Packages,Oral and Maxillofacial Surgery,Polytrauma,Plastic & reconstructive,Burns management,Medical Oncology,Surgical Oncology,Urology,Paediatric surgery,Cardio-thoracic & Vascular surgery,Orthopaedics,Obstetrics & Gynaecology,Opthalmology,Otorhinolaryngology,General Surgery,…
Assam	Trust	Dibrugarh		Private (For Profit)	Neurosurgery,Interventional Neuroradiology,General Medicine,Paediatric medical management,Urology,Cardiology,Neo-natal,Emergency Room Packages,Oral and Maxillofacial Surgery,Polytrauma,Paediatric surgery,Otorhinolaryngology,General Surgery,Orthopaedics,Obstetrics & Gynaecology,Opthalmology,General Surgery,Otorhinolaryngology,Orthopaedics,Cardio-thoracic & Vascular surgery,Urology,Neurosurgery,Int…
Assam	Trust	Sonitpur		Private (For Profit)	Paediatric medical management,Obstetrics & Gynaecology,General Medicine,Emergency Room Packages	NA
Assam	Trust	Cachar		Private (Not for Profit)	Radiation Oncology,Medical Oncology,Surgical Oncology,Paediatric cancer,General Medicine,Emergency Room Packages	NA
Assam	Trust	Kamrup Metro		Private (For Profit)	Orthopaedics	NA
Assam	Trust	Sonitpur		Private (Not for Profit)	General Surgery,Orthopaedics,Opthalmology,Obstetrics & Gynaecology,Oral and Maxillofacial Surgery,Urology,General Medicine,Emergency Room Packages,Paediatric medical management	NA
Assam	Trust	Kamrup Metro		Private (For Profit)	Neo-natal,Paediatric medical management,General Medicine,Emergency Room Packages,Oral and Maxillofacial Surgery,Medical Oncology,Surgical Oncology,Neurosurgery,Interventional Neuroradiology,Paediatric surgery,Orthopaedics,Obstetrics & Gynaecology,Otorhinolaryngology,General Surgery,Urology,Cardiology	NA
Assam	Trust	Dibrugarh		Private (For Profit)	Paediatric medical management,Orthopaedics,General Surgery,General Medicine,Emergency Room Packages	NA
Assam	Trust	Kamrup Metro		Private (For Profit)	Paediatric medical management,General Medicine,Emergency Room Packages,Obstetrics & Gynaecology,Otorhinolaryngology,General Surgery	NA
Assam	Trust	Kamrup Metro		Private (For Profit)	Obstetrics & Gynaecology,General Medicine,Emergency Room Packages,Paediatric medical management,Plastic & reconstructive,Burns management,Polytrauma,Neo-natal,General Surgery	NA
Assam	Trust	Dhemaji		Private (For Profit)	General Surgery,Paediatric medical management,Orthopaedics,Obstetrics & Gynaecology	NA
Assam	Trust	Kamrup Metro		Private (For Profit)	Urology,Obstetrics & Gynaecology,General Surgery,Neo-natal,Paediatric medical management	NA
Assam	Trust	Kamrup Metro		Private (For Profit)	Cardiology	NA
Assam	Trust	Kamrup Metro		Private (For Profit)	Neurosurgery,Interventional Neuroradiology,General Medicine,Urology	NA
Assam	Trust	Nagaon	DH	Public	Mental Disorders Packages,General Medicine,Neo-natal,Paediatric medical management,Emergency Room Packages,Oral and Maxillofacial Surgery,Obstetrics & Gynaecology,Opthalmology,Otorhinolaryngology,General Surgery	NA
Assam	Trust	Darrang	DH	Public	Mental Disorders Packages,Oral and Maxillofacial Surgery,Obstetrics & Gynaecology,Opthalmology,Otorhinolaryngology,General Surgery	NA
Assam	Trust	Kamrup	DH	Public	-NA-	NA
Assam	Trust	Goalpara	DH	Public	Mental Disorders Packages,General Medicine,Paediatric medical management,Emergency Room Packages,Oral and Maxillofacial Surgery,Orthopaedics,Obstetrics & Gynaecology,Opthalmology,Otorhinolaryngology,General Surgery	NA
Assam	Trust	Barpeta	DH	Public	Mental Disorders Packages,Paediatric medical management,Oral and Maxillofacial Surgery,Orthopaedics,Obstetrics & Gynaecology,Opthalmology,General Surgery	NA
Assam	Trust	Karimganj	DH	Public	General Medicine,Emergency Room Packages,General Surgery	NA
Assam	Trust	Nalbari	DH	Public	Mental Disorders Packages,Paediatric medical management,General Medicine,Emergency Room Packages,Oral and Maxillofacial Surgery,Orthopaedics,Obstetrics & Gynaecology,Opthalmology,Otorhinolaryngology,General Surgery	NA
Assam	Trust	Lakhimpur	DH	Public	General Medicine,Emergency Room Packages,General Surgery	NA
Assam	Trust	Kokrajhar	DH	Public	Paediatric medical management,Oral and Maxillofacial Surgery,Obstetrics & Gynaecology,Opthalmology,Otorhinolaryngology,General Surgery	NA
Assam	Trust	Baksa	DH	Public	Mental Disorders Packages,Paediatric medical management,General Medicine,Emergency Room Packages,Oral and Maxillofacial Surgery,Obstetrics & Gynaecology,Opthalmology,Otorhinolaryngology,General Surgery	NA
Assam	Trust	Chirang	DH	Public	Paediatric medical management,General Medicine,Emergency Room Packages,Oral and Maxillofacial Surgery,Opthalmology,Otorhinolaryngology,General Surgery	NA
Assam	Trust	Hailakandi	DH	Public	General Medicine,Emergency Room Packages,General Surgery	NA
Assam	Trust	Kamrup Metro	DH	Public	Mental Disorders Packages,Paediatric medical management,Otorhinolaryngology,General Surgery,Oral and Maxillofacial Surgery,Orthopaedics,Obstetrics & Gynaecology,Opthalmology	NA
Assam	Trust	Dhubri	DH	Public	General Medicine,Emergency Room Packages,General Surgery	NA
Assam	Trust	Kamrup Metro		Private (For Profit)	Orthopaedics,General Medicine,Emergency Room Packages,Cardiology,Paediatric medical management,Neurosurgery,Cardio-thoracic & Vascular surgery,Paediatric surgery,Urology,Interventional Neuroradiology,General Surgery,Otorhinolaryngology	NA
Assam	Trust	Kamrup Metro		Private (Not for Profit)	General Surgery,Otorhinolaryngology,Obstetrics & Gynaecology,Opthalmology,Oral and Maxillofacial Surgery,Paediatric medical management,Mental Disorders Packages,Orthopaedics,Surgical Oncology,General Medicine,Emergency Room Packages,Neurosurgery	NA
Assam	Trust	Sivasagar		Private (For Profit)	General Medicine,Emergency Room Packages,General Surgery,Otorhinolaryngology,Opthalmology,Obstetrics & Gynaecology,Cardiology,Oral and Maxillofacial Surgery,Paediatric medical management	NA
Assam	Trust	Kamrup Metro		Private (For Profit)	Otorhinolaryngology,Orthopaedics,Cardio-thoracic & Vascular surgery,Paediatric surgery,Neurosurgery,Interventional Neuroradiology,Surgical Oncology,Paediatric medical management,Neo-natal,Cardiology,General Medicine,General Surgery,Opthalmology,Obstetrics & Gynaecology,Emergency Room Packages,Medical Oncology,Polytrauma,Mental Disorders Packages	NA
Assam	Trust	Dibrugarh		Private (For Profit)	Otorhinolaryngology,Opthalmology,Obstetrics & Gynaecology,Orthopaedics,Paediatric surgery,Urology,Surgical Oncology,Medical Oncology,Radiation Oncology,Plastic & reconstructive,Burns management,Oral and Maxillofacial Surgery,Paediatric cancer,General Medicine,Emergency Room Packages,Mental Disorders Packages,Paediatric medical management,Neo-natal,Cardiology,Neurosurgery,General Surgery	NA
Assam	Trust	Kamrup Metro		Private (For Profit)	Surgical Oncology	NA
Assam	Trust	Kamrup Metro		Private (For Profit)	General Surgery,Cardio-thoracic & Vascular surgery,Radiation Oncology,Cardiology	NA
Assam	Trust	Kamrup Metro		Private (For Profit)	Opthalmology	NA
Assam	Trust	Kamrup Metro		Private (For Profit)	Opthalmology	NA
Assam	Trust	Kamrup Metro		Private (For Profit)	Opthalmology	NA
Assam	Trust	Sivasagar		Private (For Profit)	Opthalmology	NA
Assam	Trust	Kamrup Metro		Private (For Profit)	Opthalmology	NA
Assam	Trust	Kamrup Metro		Private (For Profit)	Opthalmology	NA
Assam	Trust	Kamrup Metro		Private (For Profit)	Opthalmology	NA
Assam	Trust	Jorhat		Private (For Profit)	Opthalmology	NA
Assam	Trust	Sonitpur		Private (For Profit)	Opthalmology	NA
Assam	Trust	Nagaon		Private (For Profit)	Opthalmology	NA
Assam	Trust	Kamrup Metro		Private (For Profit)	Opthalmology	NA
Assam	Trust	Kamrup Metro		Private (Not for Profit)	Opthalmology	NA
Assam	Trust	Kamrup Metro		Private (For Profit)	Opthalmology	NA
Assam	Trust	Kamrup Metro		Private (Not for Profit)	Opthalmology	NA
Assam	Trust	Nalbari		Private (For Profit)	Opthalmology	NA
Assam	Trust	Kamrup Metro		Private (For Profit)	Opthalmology	NA
Assam	Trust	Lakhimpur		Private (For Profit)	Opthalmology	NA
Assam	Trust	Kamrup Metro		Private (For Profit)	Paediatric medical management,General Surgery,Otorhinolaryngology,Obstetrics & Gynaecology,Orthopaedics,Neurosurgery,Interventional Neuroradiology,Surgical Oncology,Radiation Oncology,General Medicine,Emergency Room Packages	NA
Assam	Trust	Kamrup Metro		Private (For Profit)	Orthopaedics,Obstetrics & Gynaecology,Otorhinolaryngology,General Surgery,Paediatric medical management,General Medicine,Emergency Room Packages	NA
Assam	Trust	Kamrup		Private (For Profit)	General Surgery	NA
Assam	Trust	Karimganj		Private (Not for Profit)	General Medicine,Emergency Room Packages,Paediatric surgery,Obstetrics & Gynaecology,General Surgery,Mental Disorders Packages,Paediatric medical management	NA
Assam	Trust	Kokrajhar		Private (Not for Profit)	Mental Disorders Packages,General Surgery,Opthalmology,Obstetrics & Gynaecology,Orthopaedics,General Medicine,Emergency Room Packages,Paediatric medical management	NA
Assam	Trust	Dibrugarh		Private (For Profit)	Obstetrics & Gynaecology,Orthopaedics,Urology,Neurosurgery,Interventional Neuroradiology,Surgical Oncology,Plastic & reconstructive,Burns management,Polytrauma,General Medicine,Emergency Room Packages,Paediatric medical management,Cardiology,Neo-natal,General Surgery,Otorhinolaryngology	NA
Assam	Trust	Jorhat		Private (For Profit)	General Surgery,Obstetrics & Gynaecology,Orthopaedics,Neurosurgery,Interventional Neuroradiology,Polytrauma,Paediatric medical management,Oral and Maxillofacial Surgery,General Medicine,Emergency Room Packages,Mental Disorders Packages	NA
Assam	Trust	Biswanath		Private (For Profit)	Orthopaedics,Obstetrics & Gynaecology,Oral and Maxillofacial Surgery,General Surgery,Paediatric medical management	NA
Assam	Trust	Kamrup Metro		Private (For Profit)	Paediatric medical management,General Medicine,Emergency Room Packages,Obstetrics & Gynaecology,General Surgery	NA
Assam	Trust	Tinsukia		Private (For Profit)	Obstetrics & Gynaecology,General Surgery	NA
Assam	Trust	Darrang		Private (For Profit)	Obstetrics & Gynaecology,General Surgery,Paediatric medical management,General Medicine,Emergency Room Packages	NA
Assam	Trust	Biswanath		Private (For Profit)	Paediatric medical management,Otorhinolaryngology,Obstetrics & Gynaecology,General Surgery,General Medicine,Emergency Room Packages	NA
Assam	Trust	Kamrup Metro		Private (For Profit)	General Medicine,Emergency Room Packages,Medical Oncology,Opthalmology,Otorhinolaryngology	NA
Assam	Trust	Karbi Anglong		Private (Not for Profit)	Orthopaedics,General Medicine,Emergency Room Packages,General Surgery	NA
Assam	Trust	Goalpara		Private (For Profit)	Mental Disorders Packages,Orthopaedics,Obstetrics & Gynaecology,Otorhinolaryngology,General Surgery,General Medicine,Emergency Room Packages	NA
Assam	Trust	Sivasagar		Private (For Profit)	General Medicine,Emergency Room Packages,Obstetrics & Gynaecology	NA
Assam	Trust	Lakhimpur		Private (For Profit)	Paediatric medical management,General Medicine,Emergency Room Packages,Orthopaedics,Obstetrics & Gynaecology,General Surgery	NA
Assam	Trust	Tinsukia		Private (For Profit)	Polytrauma,Plastic & reconstructive,Burns management,Orthopaedics,Obstetrics & Gynaecology,General Medicine,Emergency Room Packages,General Surgery	NA
Assam	Trust	Kamrup Metro		Private (For Profit)	General Medicine,Paediatric medical management,Neurosurgery,Urology,Cardiology,Emergency Room Packages,Orthopaedics,Opthalmology,Otorhinolaryngology,General Surgery	NA
Assam	Trust	Kamrup		Private (For Profit)	Obstetrics & Gynaecology,General Surgery,Paediatric medical management,General Medicine,Emergency Room Packages	NA
Assam	Trust	Kamrup Metro		Private (For Profit)	Neo-natal,Paediatric medical management	NA
Assam	Trust	Bongaigaon		Private (For Profit)	Obstetrics & Gynaecology,Otorhinolaryngology,Oral and Maxillofacial Surgery,Paediatric medical management,General Medicine,Emergency Room Packages,General Surgery	NA
Assam	Trust	Dima Hasao		Private (Not for Profit)	Paediatric medical management,General Surgery,General Medicine,Emergency Room Packages,Urology,Obstetrics & Gynaecology,Otorhinolaryngology	NA
Assam	Trust	Tinsukia		Private (Not for Profit)	General Medicine,Emergency Room Packages	NA
Assam	Trust	Barpeta		Private (For Profit)	Obstetrics & Gynaecology,General Surgery,General Medicine,Emergency Room Packages	NA
Assam	Trust	Tinsukia		Private (Not for Profit)	Paediatric medical management	NA
Assam	Trust	Kamrup Metro		Private (For Profit)	Neurosurgery,Interventional Neuroradiology	NA
Assam	Trust	Kamrup Metro		Private (For Profit)	Paediatric medical management,General Medicine,Emergency Room Packages,Oral and Maxillofacial Surgery,Polytrauma,Orthopaedics,Obstetrics & Gynaecology,Otorhinolaryngology,General Surgery	NA
Assam	Trust	Goalpara		Private (For Profit)	General Surgery,Otorhinolaryngology,Obstetrics & Gynaecology,Orthopaedics,General Medicine,Emergency Room Packages,Paediatric medical management,Mental Disorders Packages	NA
Assam	Trust	Kamrup Metro		Private (For Profit)	General Surgery,Otorhinolaryngology,Obstetrics & Gynaecology,Orthopaedics,Neurosurgery,Interventional Neuroradiology,Plastic & reconstructive,Burns management,Polytrauma,General Medicine,Emergency Room Packages,Paediatric medical management,Cardiology,Urology,Mental Disorders Packages	NA
Assam	Trust	Dibrugarh		Private (For Profit)	Mental Disorders Packages,Paediatric medical management,General Medicine,Emergency Room Packages,Orthopaedics,Obstetrics & Gynaecology,Opthalmology,Otorhinolaryngology,General Surgery	NA
Assam	Trust	Golaghat		Private (For Profit)	General Surgery,Obstetrics & Gynaecology,Paediatric medical management,General Medicine,Emergency Room Packages	NA
Assam	Trust	Kamrup Metro		Private (For Profit)	Paediatric medical management,General Medicine,Emergency Room Packages,Obstetrics & Gynaecology,General Surgery	NA
Assam	Trust	Dibrugarh		Private (For Profit)	Paediatric medical management,Cardiology,General Medicine,Neurosurgery,Mental Disorders Packages,Medical Oncology,Emergency Room Packages,Urology,General Surgery,Otorhinolaryngology,Obstetrics & Gynaecology,Orthopaedics,Cardio-thoracic & Vascular surgery,Paediatric surgery,Surgical Oncology	NA
Assam	Trust	Nagaon		Private (For Profit)	General Surgery,Opthalmology,Obstetrics & Gynaecology,Orthopaedics,Urology,Paediatric medical management,General Medicine,Emergency Room Packages	NA
Assam	Trust	Hojai		Private (Not for Profit)	Orthopaedics,Otorhinolaryngology,Obstetrics & Gynaecology,General Surgery,Paediatric medical management,General Medicine,Emergency Room Packages	NA
Assam	Trust	Kamrup Metro		Private (For Profit)	Otorhinolaryngology,Opthalmology,Obstetrics & Gynaecology,Orthopaedics,Neurosurgery,Interventional Neuroradiology,Plastic & reconstructive,Burns management,Oral and Maxillofacial Surgery,Cardiology,General Medicine,Urology,Paediatric medical management,Mental Disorders Packages,Emergency Room Packages,General Surgery,Cardio-thoracic & Vascular surgery,Polytrauma,Neo-natal	NA
Assam	Trust	Kamrup Metro		Private (For Profit)	General Surgery,Otorhinolaryngology,Obstetrics & Gynaecology,Orthopaedics,Urology,Plastic & reconstructive,Burns management,General Medicine,Emergency Room Packages,Paediatric medical management,Mental Disorders Packages	NA
Assam	Trust	Nagaon		Private (For Profit)	Opthalmology	NA
Assam	Trust	Kamrup Metro		Private (Not for Profit)	Neo-natal,Paediatric medical management,General Medicine,Emergency Room Packages,Orthopaedics,Obstetrics & Gynaecology,General Surgery,Paediatric surgery
Assam	Trust	Kamrup Metro		Private (Not for Profit)	Opthalmology	-NA-
Assam	Trust	Goalpara		Private (For Profit)	Paediatric medical management,General Medicine,Emergency Room Packages,Obstetrics & Gynaecology,General Surgery	-NA-
Assam	Trust	Tinsukia		Private (For Profit)	General Medicine,Emergency Room Packages	-NA-
Assam	Trust	Nagaon		Private (For Profit)	General Surgery,Paediatric medical management,General Medicine,Emergency Room Packages,Orthopaedics,Obstetrics & Gynaecology	-NA-
Assam	Trust	Bongaigaon		Private (For Profit)	Obstetrics & Gynaecology,Oral and Maxillofacial Surgery,General Surgery,Paediatric medical management,Mental Disorders Packages,General Medicine,Emergency Room Packages	-NA-
Assam	Trust	Golaghat		Private (For Profit)	General Medicine,Emergency Room Packages,Obstetrics & Gynaecology,General Surgery	-NA-
Assam	Trust	Nagaon		Private (For Profit)	Mental Disorders Packages,Paediatric medical management,General Medicine,Emergency Room Packages,Orthopaedics,Obstetrics & Gynaecology,Opthalmology,General Surgery	-NA-
Assam	Trust	Dibrugarh		Private (For Profit)	Paediatric medical management,General Medicine,Emergency Room Packages,Orthopaedics,Obstetrics & Gynaecology,General Surgery	-NA-
Assam	Trust	Nagaon		Private (For Profit)	Orthopaedics,Obstetrics & Gynaecology,Oral and Maxillofacial Surgery,General Surgery,Paediatric medical management,General Medicine,Emergency Room Packages	-NA-
Assam	Trust	Nagaon		Private (Not for Profit)	General Surgery,Otorhinolaryngology,Obstetrics & Gynaecology,Orthopaedics,Paediatric medical management,General Medicine,Urology,Emergency Room Packages	-NA-
Assam	Trust	Goalpara		Private (Not for Profit)	General Medicine,Emergency Room Packages,Urology,Obstetrics & Gynaecology,Otorhinolaryngology,General Surgery	NA
Assam	Trust	Hailakandi		Private (Not for Profit)	General Surgery,Otorhinolaryngology,Obstetrics & Gynaecology,General Medicine,Orthopaedics,Paediatric surgery,Urology,Oral and Maxillofacial Surgery,Emergency Room Packages,Paediatric medical management,Mental Disorders Packages	NA
Assam	Trust	Marigaon		Private (For Profit)	Paediatric medical management,Neo-natal,Cardiology,General Medicine,Neurosurgery,General Surgery,Otorhinolaryngology,Opthalmology,Orthopaedics,Emergency Room Packages	NA
Assam	Trust	Barpeta		Private (For Profit)	General Surgery,Otorhinolaryngology,Opthalmology,Obstetrics & Gynaecology,Orthopaedics,Polytrauma,Paediatric medical management,Neo-natal,General Medicine,Mental Disorders Packages	NA
Assam	Trust	Hailakandi		Private (For Profit)	General Surgery,Otorhinolaryngology,Obstetrics & Gynaecology,Orthopaedics,Medical Oncology,Oral and Maxillofacial Surgery,General Medicine,Emergency Room Packages,Paediatric medical management,Neo-natal,Cardiology,Neurosurgery,Mental Disorders Packages	NA
Assam	Trust	Barpeta		Private (For Profit)	Obstetrics & Gynaecology,General Surgery,Paediatric medical management	NA
Assam	Trust	Tinsukia		Private (For Profit)	General Surgery,General Medicine,Paediatric medical management,Emergency Room Packages	NA
Assam	Trust	Kamrup Metro		Private (For Profit)	Opthalmology	NA
Assam	Trust	Kamrup Metro		Private (For Profit)	General Surgery,Otorhinolaryngology,Orthopaedics,Urology,Neo-natal,Cardiology,Obstetrics & Gynaecology,General Medicine,Emergency Room Packages,Paediatric medical management	NA
Assam	Trust	Biswanath		Private (For Profit)	Obstetrics & Gynaecology	NA
Assam	Trust	Kamrup Metro		Private (For Profit)	General Surgery,Obstetrics & Gynaecology,General Medicine,Emergency Room Packages,Otorhinolaryngology,Orthopaedics,Paediatric medical management	NA
Assam	Trust	Sonitpur		Private (For Profit)	Otorhinolaryngology,General Medicine,Emergency Room Packages,Paediatric medical management,General Surgery,Opthalmology,Obstetrics & Gynaecology,Orthopaedics,Paediatric surgery,Urology,Surgical Oncology,Medical Oncology,Plastic & reconstructive,Burns management,Polytrauma,Oral and Maxillofacial Surgery,Neo-natal,Cardiology,Mental Disorders Packages	NA
Assam	Trust	Kamrup Metro		Private (For Profit)	Cardiology	NA
Assam	Trust	Goalpara		Private (Not for Profit)	Obstetrics & Gynaecology,Otorhinolaryngology,General Surgery,Paediatric medical management,General Medicine,Emergency Room Packages	NA
Assam	Trust	Darrang		Private (For Profit)	Obstetrics & Gynaecology,General Surgery,General Medicine,Emergency Room Packages	NA
Assam	Trust	Cachar		Private (For Profit)	General Surgery,Otorhinolaryngology,Oral and Maxillofacial Surgery,General Medicine,Emergency Room Packages,Paediatric medical management,Mental Disorders Packages,Obstetrics & Gynaecology,Orthopaedics,Plastic & reconstructive,Burns management,Cardiology,Urology	NA
Assam	Trust	Tinsukia		Private (For Profit)	Paediatric medical management,General Medicine,Emergency Room Packages,Obstetrics & Gynaecology,General Surgery	NA
Assam	Trust	Lakhimpur		Private (For Profit)	Neo-natal,Obstetrics & Gynaecology,Oral and Maxillofacial Surgery,General Surgery,Paediatric medical management,General Medicine,Emergency Room Packages	NA
Assam	Trust	Kamrup Metro	MC	Public	Mental Disorders Packages,Paediatric medical management,General Medicine,Emergency Room Packages,Orthopaedics,Obstetrics & Gynaecology,Opthalmology,Otorhinolaryngology,General Surgery	NA
Assam	Trust	Lakhimpur		Private (For Profit)	General Medicine,Emergency Room Packages	NA
Assam	Trust	Hojai		Private (For Profit)	Neurosurgery,Interventional Neuroradiology,Neo-natal,Oral and Maxillofacial Surgery,General Medicine,Emergency Room Packages,Paediatric medical management,Cardiology,General Surgery,Otorhinolaryngology,Obstetrics & Gynaecology,Orthopaedics	NA
Assam	Trust	Lakhimpur		Private (For Profit)	Paediatric medical management,General Medicine,Emergency Room Packages,Oral and Maxillofacial Surgery,Orthopaedics,Obstetrics & Gynaecology,Opthalmology,Otorhinolaryngology,General Surgery	NA
Assam	Trust	Kamrup Metro		Private (For Profit)	Obstetrics & Gynaecology	NA
Assam	Trust	Kamrup Metro		Private (For Profit)	Opthalmology	NA
Assam	Trust	Dibrugarh		Private (For Profit)	Polytrauma,General Surgery,Otorhinolaryngology,Opthalmology,Obstetrics & Gynaecology,Orthopaedics,Urology,General Medicine,Mental Disorders Packages,Surgical Oncology,Plastic & reconstructive,Burns management,Emergency Room Packages,Paediatric medical management	NA
Assam	Trust	Cachar		Private (For Profit)	Opthalmology	NA
Assam	Trust	Nalbari		Private (For Profit)	Mental Disorders Packages,General Medicine,Neo-natal,Paediatric medical management,Emergency Room Packages,Polytrauma,Obstetrics & Gynaecology,Opthalmology,General Surgery	NA
Assam	Trust	Biswanath		Private (For Profit)	Obstetrics & Gynaecology,General Surgery,General Medicine,Emergency Room Packages	NA
Assam	Trust	Kamrup		Private (For Profit)	Paediatric medical management,General Medicine,Emergency Room Packages,Orthopaedics,Obstetrics & Gynaecology,Otorhinolaryngology,General Surgery	NA
Assam	Trust	Kamrup		Private (For Profit)	General Surgery,Otorhinolaryngology,Obstetrics & Gynaecology,Orthopaedics,General Medicine,Emergency Room Packages,Paediatric medical management,Cardiology,Mental Disorders Packages	NA
Assam	Trust	Jorhat		Private (For Profit)	Paediatric medical management,General Medicine,Emergency Room Packages,Obstetrics & Gynaecology	NA
Assam	Trust	Nagaon		Private (For Profit)	Paediatric medical management,General Medicine,Emergency Room Packages,Obstetrics & Gynaecology,Otorhinolaryngology,General Surgery	NA
Assam	Trust	Jorhat		Private (For Profit)	Paediatric medical management,General Medicine,Emergency Room Packages,Obstetrics & Gynaecology	NA
Assam	Trust	Tinsukia		Private (For Profit)	Paediatric medical management,Orthopaedics,Obstetrics & Gynaecology,Otorhinolaryngology,General Surgery	NA
Assam	Trust	Jorhat		Private (For Profit)	General Medicine,Emergency Room Packages,Opthalmology	NA
Assam	Trust	Tinsukia		Private (For Profit)	General Medicine,Emergency Room Packages,Obstetrics & Gynaecology,General Surgery	NA
Assam	Trust	Kamrup Metro	Other	Public	General Medicine,Emergency Room Packages,Opthalmology,Otorhinolaryngology,General Surgery	NA
Assam	Trust	Tinsukia		Private (For Profit)	Paediatric medical management,General Medicine,Emergency Room Packages,Orthopaedics,Obstetrics & Gynaecology,General Surgery	NA
Assam	Trust	Majuli	SDH	Public	Paediatric medical management,General Medicine,Emergency Room Packages,Oral and Maxillofacial Surgery,Obstetrics & Gynaecology,Opthalmology,Otorhinolaryngology	NA
Assam	Trust	Dhemaji		Private (For Profit)	Paediatric medical management,General Medicine,Emergency Room Packages,Obstetrics & Gynaecology,Otorhinolaryngology,General Surgery	NA
Assam	Trust	Sivasagar		Private (For Profit)	General Medicine,Emergency Room Packages,Oral and Maxillofacial Surgery,Obstetrics & Gynaecology,Otorhinolaryngology,General Surgery	NA
Assam	Trust	Bongaigaon	Other	Public	General Medicine,Emergency Room Packages	NA
Assam	Trust	Hojai	Other	Public	General Medicine,Emergency Room Packages,Obstetrics & Gynaecology,Otorhinolaryngology	NA
Assam	Trust	Dibrugarh	Other	Public	Paediatric medical management,Obstetrics & Gynaecology,General Surgery	NA
Assam	Trust	Tinsukia		Private (For Profit)	Obstetrics & Gynaecology,General Surgery	NA
Assam	Trust	Kamrup Metro		Private (For Profit)	Paediatric medical management,General Medicine,Emergency Room Packages,Oral and Maxillofacial Surgery,Neurosurgery,Interventional Neuroradiology,Urology,Orthopaedics,Obstetrics & Gynaecology,Opthalmology,Otorhinolaryngology,General Surgery	NA
Assam	Trust	Dhubri	CHC	Public	Obstetrics & Gynaecology	NA
Assam	Trust	Lakhimpur	CHC	Public	General Medicine,Paediatric medical management,Emergency Room Packages,Obstetrics & Gynaecology,General Surgery	NA
Assam	Trust	Biswanath	SDH	Public	Paediatric medical management,General Medicine,Emergency Room Packages,Oral and Maxillofacial Surgery,Obstetrics & Gynaecology,General Surgery	NA
Assam	Trust	Kamrup	CHC	Public	Obstetrics & Gynaecology	NA
Assam	Trust	Lakhimpur	CHC	Public	General Medicine,Paediatric medical management,Emergency Room Packages,Obstetrics & Gynaecology	NA
Assam	Trust	Sivasagar	CHC	Public	Paediatric medical management,General Medicine,Emergency Room Packages,Oral and Maxillofacial Surgery,Obstetrics & Gynaecology,Otorhinolaryngology	NA
Assam	Trust	Golaghat	CHC	Public	General Medicine,Emergency Room Packages,Oral and Maxillofacial Surgery,Obstetrics & Gynaecology	NA
Assam	Trust	Lakhimpur	SDH	Public	Mental Disorders Packages,Neo-natal,Paediatric medical management,General Medicine,Emergency Room Packages,Oral and Maxillofacial Surgery,Radiation Oncology,Obstetrics & Gynaecology,General Surgery	NA
Assam	Trust	Tinsukia	CHC	Public	Mental Disorders Packages,Obstetrics & Gynaecology	NA
Assam	Trust	Hojai	CHC	Public	Paediatric medical management,Obstetrics & Gynaecology	NA
Assam	Trust	West Karbi Anglong	CHC	Public	Obstetrics & Gynaecology	NA
Assam	Trust	Tinsukia	CHC	Public	General Medicine,Emergency Room Packages,Obstetrics & Gynaecology	NA
Assam	Trust	Kokrajhar	CHC	Public	General Medicine,Emergency Room Packages,Obstetrics & Gynaecology,General Surgery	NA
Assam	Trust	Goalpara	CHC	Public	Paediatric medical management,Oral and Maxillofacial Surgery,Obstetrics & Gynaecology,Otorhinolaryngology	NA
Assam	Trust	Biswanath	SDH	Public	Paediatric medical management,Obstetrics & Gynaecology	NA
Assam	Trust	Kamrup	CHC	Public	General Medicine,Emergency Room Packages,Obstetrics & Gynaecology	NA
Assam	Trust	Nagaon	CHC	Public	Obstetrics & Gynaecology	NA
Assam	Trust	Nagaon	CHC	Public	Obstetrics & Gynaecology	NA
Assam	Trust	Nagaon	PHC	Public	Obstetrics & Gynaecology	NA
Assam	Trust	Darrang	CHC	Public	Obstetrics & Gynaecology	NA
Assam	Trust	West Karbi Anglong	CHC	Public	Obstetrics & Gynaecology	NA
Assam	Trust	Sivasagar	SDH	Public	Paediatric medical management,Oral and Maxillofacial Surgery,Obstetrics & Gynaecology,Otorhinolaryngology,General Surgery	NA
Assam	Trust	Baksa	SHC	Public	Obstetrics & Gynaecology	NA
Assam	Trust	Lakhimpur	CHC	Public	Paediatric medical management,Obstetrics & Gynaecology,General Surgery	NA
Assam	Trust	Hojai	CHC	Public	Obstetrics & Gynaecology	NA
Assam	Trust	Hojai	CHC	Public	Obstetrics & Gynaecology	NA
Assam	Trust	Tinsukia	CHC	Public	Neo-natal,Paediatric medical management,Orthopaedics,Obstetrics & Gynaecology,General Surgery	NA
Assam	Trust	Dibrugarh	CHC	Public	Paediatric medical management,Oral and Maxillofacial Surgery,Obstetrics & Gynaecology	NA
Assam	Trust	Nalbari	CHC	Public	Paediatric medical management,General Medicine,Emergency Room Packages,Oral and Maxillofacial Surgery,Obstetrics & Gynaecology	NA
Assam	Trust	Dibrugarh	CHC	Public	Paediatric medical management,Oral and Maxillofacial Surgery,Obstetrics & Gynaecology	NA
Assam	Trust	Lakhimpur	CHC	Public	Paediatric medical management,General Medicine,Emergency Room Packages,Obstetrics & Gynaecology,Opthalmology	NA
Assam	Trust	Hojai	CHC	Public	General Medicine,Emergency Room Packages,Oral and Maxillofacial Surgery,Obstetrics & Gynaecology	NA
Assam	Trust	Kamrup	SDH	Public	Paediatric medical management,Oral and Maxillofacial Surgery,Obstetrics & Gynaecology,Otorhinolaryngology	NA
Assam	Trust	Kokrajhar	SDH	Public	Oral and Maxillofacial Surgery,Obstetrics & Gynaecology	NA
Assam	Trust	Dhemaji	CHC	Public	Paediatric medical management,Oral and Maxillofacial Surgery,Obstetrics & Gynaecology	NA
Assam	Trust	Nagaon	PHC	Public	Obstetrics & Gynaecology	NA
Assam	Trust	Charaideo	SDH	Public	Paediatric medical management,General Medicine,Emergency Room Packages,Oral and Maxillofacial Surgery,Obstetrics & Gynaecology,Opthalmology,Otorhinolaryngology,General Surgery	NA
Assam	Trust	Jorhat	CHC	Public	Paediatric medical management,Oral and Maxillofacial Surgery,Obstetrics & Gynaecology,Otorhinolaryngology	NA
Assam	Trust	Bongaigaon	CHC	Public	Oral and Maxillofacial Surgery,Obstetrics & Gynaecology	-NA-
Assam	Trust	South Salmara Mancachar	SHC	Public	Obstetrics & Gynaecology	-NA-
Assam	Trust	Hailakandi	CHC	Public	Obstetrics & Gynaecology,Opthalmology	-NA-
Assam	Trust	Goalpara	CHC	Public	General Medicine,Emergency Room Packages,Oral and Maxillofacial Surgery,Obstetrics & Gynaecology	-NA-
Assam	Trust	Karbi Anglong	CHC	Public	General Medicine,Paediatric medical management,Emergency Room Packages,Oral and Maxillofacial Surgery,Obstetrics & Gynaecology,Otorhinolaryngology	-NA-
Assam	Trust	Cachar	PHC	Public	General Medicine,Emergency Room Packages,Obstetrics & Gynaecology	-NA-
Assam	Trust	Barpeta	CHC	Public	Obstetrics & Gynaecology	NA
Assam	Trust	Chirang	CHC	Public	Obstetrics & Gynaecology,Opthalmology	NA
Assam	Trust	Marigaon	SHC	Public	Obstetrics & Gynaecology	NA
Assam	Trust	Cachar	CHC	Public	Obstetrics & Gynaecology	NA
Assam	Trust	Karbi Anglong	CHC	Public	General Medicine,Emergency Room Packages,Obstetrics & Gynaecology	NA
Assam	Trust	Cachar	PHC	Public	Obstetrics & Gynaecology	NA
Assam	Trust	Bongaigaon	PHC	Public	Obstetrics & Gynaecology	NA
Assam	Trust	Tinsukia	CHC	Public	Oral and Maxillofacial Surgery,Obstetrics & Gynaecology	NA
Assam	Trust	Dhubri	CHC	Public	General Medicine,Emergency Room Packages,Oral and Maxillofacial Surgery,Obstetrics & Gynaecology	NA
Assam	Trust	Barpeta	CHC	Public	General Medicine,Emergency Room Packages,Obstetrics & Gynaecology	NA
Assam	Trust	Dhemaji	PHC	Public	General Medicine,Emergency Room Packages,Obstetrics & Gynaecology	NA
Assam	Trust	Sonitpur	CHC	Public	General Medicine,Emergency Room Packages,Oral and Maxillofacial Surgery,Obstetrics & Gynaecology	NA
Assam	Trust	Nagaon	CHC	Public	Paediatric medical management,Oral and Maxillofacial Surgery,Obstetrics & Gynaecology	NA
Assam	Trust	Cachar	CHC	Public	Obstetrics & Gynaecology	NA
Assam	Trust	Karbi Anglong	CHC	Public	General Medicine,Emergency Room Packages,Obstetrics & Gynaecology,Otorhinolaryngology	NA
Assam	Trust	Dhubri	CHC	Public	General Medicine,Emergency Room Packages,Obstetrics & Gynaecology	NA
Assam	Trust	South Salmara Mancachar	PHC	Public	Obstetrics & Gynaecology	NA
Assam	Trust	Dhemaji	CHC	Public	Paediatric medical management,General Medicine,Emergency Room Packages,Oral and Maxillofacial Surgery,Obstetrics & Gynaecology	NA
Assam	Trust	Dhubri	PHC	Public	Obstetrics & Gynaecology	NA
Assam	Trust	Kamrup	CHC	Public	Paediatric medical management,General Medicine,Emergency Room Packages,Oral and Maxillofacial Surgery,Obstetrics & Gynaecology	NA
Assam	Trust	Hojai	CHC	Public	Obstetrics & Gynaecology	NA
Assam	Trust	Karbi Anglong	CHC	Public	Obstetrics & Gynaecology	NA
Assam	Trust	Barpeta	SHC	Public	Obstetrics & Gynaecology	NA
Assam	Trust	Dhemaji	CHC	Public	Obstetrics & Gynaecology	NA
Assam	Trust	Cachar	CHC	Public	General Medicine,Emergency Room Packages,Obstetrics & Gynaecology	NA
Assam	Trust	Hailakandi	CHC	Public	Paediatric medical management,General Medicine,Emergency Room Packages,Obstetrics & Gynaecology	NA
Assam	Trust	Goalpara	PHC	Public	Obstetrics & Gynaecology	NA
Assam	Trust	Marigaon	CHC	Public	Oral and Maxillofacial Surgery,Obstetrics & Gynaecology,Otorhinolaryngology	NA
Assam	Trust	Goalpara	CHC	Public	Paediatric medical management,Obstetrics & Gynaecology	NA
Assam	Trust	Hailakandi	CHC	Public	Paediatric medical management,Obstetrics & Gynaecology	NA
Assam	Trust	Bongaigaon	PHC	Public	Obstetrics & Gynaecology	NA
Assam	Trust	Kamrup Metro	W&C	Public	Paediatric medical management,Obstetrics & Gynaecology	NA
Assam	Trust	South Salmara Mancachar	CHC	Public	Paediatric medical management,Obstetrics & Gynaecology	NA
Assam	Trust	Bongaigaon	CHC	Public	Oral and Maxillofacial Surgery,Obstetrics & Gynaecology	NA
Assam	Trust	Goalpara	CHC	Public	Obstetrics & Gynaecology	NA
Assam	Trust	Golaghat	CHC	Public	Obstetrics & Gynaecology	NA
Assam	Trust	Dhubri	CHC	Public	General Medicine,Emergency Room Packages,Obstetrics & Gynaecology	NA
Assam	Trust	Marigaon	CHC	Public	Paediatric medical management,Oral and Maxillofacial Surgery,Obstetrics & Gynaecology	NA
Assam	Trust	Marigaon	CHC	Public	Obstetrics & Gynaecology	NA
Assam	Trust	Cachar	CHC	Public	Obstetrics & Gynaecology	NA
Assam	Trust	Jorhat	SDH	Public	Paediatric medical management,Oral and Maxillofacial Surgery,Obstetrics & Gynaecology,Opthalmology,Otorhinolaryngology,General Surgery	NA
Assam	Trust	Dibrugarh	CHC	Public	Oral and Maxillofacial Surgery,Obstetrics & Gynaecology	NA
Assam	Trust	Udalguri	CHC	Public	Obstetrics & Gynaecology	NA
Assam	Trust	Baksa	CHC	Public	Obstetrics & Gynaecology	NA
Assam	Trust	Dhubri	PHC	Public	Obstetrics & Gynaecology	NA
Assam	Trust	Barpeta	SDH	Public	Paediatric medical management,Oral and Maxillofacial Surgery,Obstetrics & Gynaecology,Opthalmology,Otorhinolaryngology	NA
Assam	Trust	Kamrup	PHC	Public	Obstetrics & Gynaecology	NA
Assam	Trust	Cachar	PHC	Public	General Medicine,Emergency Room Packages,Obstetrics & Gynaecology,General Surgery	NA
Assam	Trust	Golaghat	CHC	Public	Paediatric medical management,Obstetrics & Gynaecology,Opthalmology	NA
Assam	Trust	Goalpara	PHC	Public	General Medicine,Emergency Room Packages,Obstetrics & Gynaecology	NA
Assam	Trust	Golaghat	CHC	Public	Obstetrics & Gynaecology	NA
Assam	Trust	Nagaon	CHC	Public	Obstetrics & Gynaecology	NA
Assam	Trust	Udalguri	CHC	Public	Oral and Maxillofacial Surgery,Obstetrics & Gynaecology	NA
Assam	Trust	Udalguri	CHC	Public	Obstetrics & Gynaecology	NA
Assam	Trust	Sonitpur	CHC	Public	Obstetrics & Gynaecology	NA
Assam	Trust	Cachar	PHC	Public	Obstetrics & Gynaecology	NA
Assam	Trust	Barpeta	CHC	Public	Obstetrics & Gynaecology	NA
Assam	Trust	Barpeta	PHC	Public	Obstetrics & Gynaecology	NA
Assam	Trust	Karimganj	CHC	Public	Obstetrics & Gynaecology	NA
Assam	Trust	Karimganj	PHC	Public	Obstetrics & Gynaecology	NA
Assam	Trust	Nagaon	CHC	Public	Obstetrics & Gynaecology	NA
Assam	Trust	Karimganj	CHC	Public	Obstetrics & Gynaecology	NA
Assam	Trust	Dhubri	CHC	Public	General Medicine,Emergency Room Packages,Obstetrics & Gynaecology	NA
Assam	Trust	South Salmara Mancachar	SDH	Public	Paediatric medical management,General Medicine,Emergency Room Packages,Obstetrics & Gynaecology	NA
Assam	Trust	Nagaon	PHC	Public	Obstetrics & Gynaecology	NA
Assam	Trust	Nagaon	CHC	Public	Oral and Maxillofacial Surgery,Obstetrics & Gynaecology	NA
Assam	Trust	Cachar	CHC	Public	Oral and Maxillofacial Surgery,Obstetrics & Gynaecology	NA
Assam	Trust	Nagaon	CHC	Public	Paediatric medical management,Oral and Maxillofacial Surgery,Obstetrics & Gynaecology,General Surgery	NA
Assam	Trust	Dibrugarh	CHC	Public	General Medicine,Emergency Room Packages,Obstetrics & Gynaecology	NA
Assam	Trust	Barpeta	CHC	Public	Obstetrics & Gynaecology	NA
Assam	Trust	Karimganj	PHC	Public	General Medicine,Emergency Room Packages,Obstetrics & Gynaecology,Opthalmology	NA
Assam	Trust	Nagaon	CHC	Public	Oral and Maxillofacial Surgery,Obstetrics & Gynaecology,Otorhinolaryngology	NA
Assam	Trust	Cachar	SHC	Public	Paediatric medical management,Obstetrics & Gynaecology	NA
Assam	Trust	Sonitpur	PHC	Public	Obstetrics & Gynaecology	NA
Assam	Trust	Dibrugarh	Other	Public	General Medicine,Emergency Room Packages	NA
Assam	Trust	Dibrugarh	Other	Public	General Medicine,Emergency Room Packages	NA
Assam	Trust	Dibrugarh	Other	Public	General Medicine,Emergency Room Packages	NA
Bihar	Trust	Patna	MC	Public	Mental Disorders Packages,General Medicine,Paediatric medical management,Neurosurgery,Urology,Neo-natal,Emergency Room Packages,Polytrauma,Plastic & reconstructive,Burns management,Radiation Oncology,Medical Oncology,Orthopaedics,Obstetrics & Gynaecology,Opthalmology,Otorhinolaryngology,General Surgery,Paediatric surgery,Interventional Neuroradiology,Cardiology	-NA-
Bihar	Trust	Patna	MC	Public	General Surgery,Otorhinolaryngology,Opthalmology,Obstetrics & Gynaecology,Cardio-thoracic & Vascular surgery,Paediatric surgery,Urology,Neurosurgery,Interventional Neuroradiology,Surgical Oncology,Medical Oncology,Plastic & reconstructive,Burns management,Polytrauma,Oral and Maxillofacial Surgery,General Medicine,Emergency Room Packages,Paediatric medical management,Neo-natal,Cardiology,Mental Di…	-NA-
Bihar	Trust	Patna	MC	Public	General Medicine,Urology,Cardiology,Neo-natal,Paediatric medical management,Emergency Room Packages,Paediatric cancer,Oral and Maxillofacial Surgery,Polytrauma,Radiation Oncology,Medical Oncology,Obstetrics & Gynaecology,Opthalmology,Otorhinolaryngology,Mental Disorders Packages,Neurosurgery,Surgical Oncology,Interventional Neuroradiology,Paediatric surgery,Cardio-thoracic & Vascular surgery,Gene…	-NA-
Bihar	Trust	Nalanda	DH	Public	General Medicine,Polytrauma,Paediatric medical management,Neo-natal,General Surgery,Opthalmology,Obstetrics & Gynaecology,Orthopaedics,Oral and Maxillofacial Surgery,Emergency Room Packages	-NA-
Bihar	Trust	Aurangabad	DH	Public	Obstetrics & Gynaecology,Opthalmology,General Surgery,Polytrauma,Neo-natal,Paediatric medical management,Oral and Maxillofacial Surgery,Orthopaedics,General Medicine,Emergency Room Packages	-NA-
Bihar	Trust	Begusarai	DH	Public	General Surgery,Opthalmology,Obstetrics & Gynaecology,Orthopaedics,Oral and Maxillofacial Surgery,General Medicine,Emergency Room Packages,Paediatric medical management,Neo-natal	-NA-
Bihar	Trust	Arwal	DH	Public	Opthalmology,Obstetrics & Gynaecology,Oral and Maxillofacial Surgery,General Medicine,Emergency Room Packages,Paediatric medical management
Bihar	Trust	Munger	DH	Public	Paediatric medical management,General Medicine,Emergency Room Packages,Orthopaedics,Obstetrics & Gynaecology,Opthalmology,General Surgery	-NA-
Bihar	Trust	Buxar	DH	Public	Oral and Maxillofacial Surgery,Obstetrics & Gynaecology,Otorhinolaryngology,General Surgery,Mental Disorders Packages,Neo-natal,Paediatric medical management,General Medicine,Emergency Room Packages,Orthopaedics,Opthalmology	-NA-
Bihar	Trust	Patna	SH	Public	Cardiology,Cardio-thoracic & Vascular surgery	-NA-
Bihar	Trust	Nalanda	MC	Public	General Surgery,Otorhinolaryngology,Opthalmology,Obstetrics & Gynaecology,Orthopaedics,Oral and Maxillofacial Surgery,General Medicine,Emergency Room Packages,Paediatric medical management,Mental Disorders Packages,Neo-natal	-NA-
Bihar	Trust	Banka	DH	Public	Obstetrics & Gynaecology,Oral and Maxillofacial Surgery,General Medicine,Emergency Room Packages,Paediatric medical management,General Surgery,Otorhinolaryngology,Opthalmology	-NA-
Bihar	Trust	Kaimur (Bhabua)	DH	Public	General Surgery,Opthalmology,Obstetrics & Gynaecology,Orthopaedics,General Medicine,Emergency Room Packages,Surgical Oncology,Otorhinolaryngology	-NA-
Bihar	Trust	Purbi Champaran	DH	Public	General Medicine,Neo-natal,Paediatric medical management,Emergency Room Packages,Oral and Maxillofacial Surgery,Orthopaedics,Obstetrics & Gynaecology,Opthalmology,Otorhinolaryngology,General Surgery,Mental Disorders Packages	-NA-
Bihar	Trust	Bhojpur	DH	Public	General Surgery,General Medicine,Emergency Room Packages,Opthalmology,Obstetrics & Gynaecology,Orthopaedics,Paediatric medical management,Oral and Maxillofacial Surgery	-NA-
Bihar	Trust	Supaul	DH	Public	General Surgery,Otorhinolaryngology,Opthalmology,Obstetrics & Gynaecology,Orthopaedics,Oral and Maxillofacial Surgery,General Medicine,Emergency Room Packages,Paediatric medical management	-NA-
Bihar	Trust	Siwan	DH	Public	Neo-natal,Paediatric medical management,General Medicine,Emergency Room Packages,Oral and Maxillofacial Surgery,Orthopaedics,Obstetrics & Gynaecology,Opthalmology,Otorhinolaryngology,General Surgery	-NA-
Bihar	Trust	Buxar	CHC	Public	General Medicine,Emergency Room Packages,General Surgery	-NA-
Bihar	Trust	Darbhanga	MC	Public	General Medicine,Cardiology,Neo-natal,Paediatric medical management,Emergency Room Packages,Medical Oncology,Orthopaedics,Obstetrics & Gynaecology,Opthalmology,Otorhinolaryngology,General Surgery,Mental Disorders Packages	-NA-
Bihar	Trust	Muzaffarpur	MC	Public	Mental Disorders Packages,General Medicine,Paediatric medical management,Neurosurgery,Urology,Neo-natal,Emergency Room Packages,General Surgery,Obstetrics & Gynaecology,Orthopaedics,Oral and Maxillofacial Surgery,Opthalmology,Otorhinolaryngology,Urology,Surgical Oncology,Medical Oncology,Plastic & reconstructive,Burns management
Bihar	Trust	Gaya	MC	Public	Otorhinolaryngology,Opthalmology,Obstetrics & Gynaecology,Orthopaedics,Plastic & reconstructive,Burns management,Polytrauma,General Medicine,Emergency Room Packages,Paediatric medical management,Neo-natal,Mental Disorders Packages,General Surgery	-NA-
Bihar	Trust	Samastipur	DH	Public	General Surgery,Otorhinolaryngology,Opthalmology,Obstetrics & Gynaecology,Oral and Maxillofacial Surgery,General Medicine,Emergency Room Packages,Paediatric medical management	-NA-
Bihar	Trust	Purnia	DH	Public	General Medicine,Emergency Room Packages,Paediatric medical management,Mental Disorders Packages,General Surgery,Otorhinolaryngology,Opthalmology,Obstetrics & Gynaecology,Orthopaedics,Oral and Maxillofacial Surgery	-NA-
Bihar	Trust	Jehanabad	SH	Public	General Surgery,Otorhinolaryngology,Opthalmology,Orthopaedics,General Medicine,Emergency Room Packages,Neo-natal,Obstetrics & Gynaecology	-NA-
Bihar	Trust	Khagaria	DH	Public	General Surgery,Otorhinolaryngology,Opthalmology,Obstetrics & Gynaecology,Orthopaedics,General Medicine,Emergency Room Packages,Paediatric medical management	-NA-
Bihar	Trust	Jamui	DH	Public	Mental Disorders Packages,Neo-natal,Paediatric medical management,General Medicine,Emergency Room Packages,Oral and Maxillofacial Surgery,General Surgery,Obstetrics & Gynaecology	-NA-
Bihar	Trust	Katihar	DH	Public	Paediatric medical management,General Medicine,Emergency Room Packages,Plastic & reconstructive,Burns management,Orthopaedics,Obstetrics & Gynaecology,Opthalmology,Otorhinolaryngology,General Surgery	-NA-
Bihar	Trust	Bhagalpur	DH	Public	General Surgery,Opthalmology,Obstetrics & Gynaecology,Polytrauma,Oral and Maxillofacial Surgery,General Medicine,Emergency Room Packages,Paediatric medical management	-NA-
Bihar	Trust	Gopalganj	DH	Public	Mental Disorders Packages,General Medicine,Cardiology,Neo-natal,Paediatric medical management,Emergency Room Packages,Oral and Maxillofacial Surgery,Orthopaedics,Obstetrics & Gynaecology,Opthalmology,General Surgery	-NA-
Bihar	Trust	Gaya	DH	Public	Cardiology,Paediatric medical management,General Medicine,Emergency Room Packages,Orthopaedics,Obstetrics & Gynaecology,Opthalmology,General Surgery	-NA-
Bihar	Trust	Pashchim Champaran	DH	Public	Mental Disorders Packages,General Medicine,Paediatric medical management,Emergency Room Packages,Oral and Maxillofacial Surgery,Orthopaedics,Obstetrics & Gynaecology,Opthalmology,Otorhinolaryngology,General Surgery	-NA-
Bihar	Trust	Rohtas	DH	Public	Mental Disorders Packages,General Medicine,Paediatric medical management,Emergency Room Packages,Oral and Maxillofacial Surgery,Orthopaedics,Obstetrics & Gynaecology,Opthalmology,Otorhinolaryngology,General Surgery	-NA-
Bihar	Trust	Vaishali	DH	Public	Mental Disorders Packages,General Medicine,Neo-natal,Paediatric medical management,Emergency Room Packages,Oral and Maxillofacial Surgery,Paediatric surgery,Orthopaedics,Obstetrics & Gynaecology,Opthalmology,Otorhinolaryngology,General Surgery	-NA-
Bihar	Trust	Bhagalpur	MC	Public	Paediatric cancer,Oral and Maxillofacial Surgery,Neurosurgery,Interventional Neuroradiology,Orthopaedics,Obstetrics & Gynaecology,Opthalmology,Otorhinolaryngology,General Surgery,General Medicine,Mental Disorders Packages,Paediatric medical management,Neo-natal,Polytrauma,Emergency Room Packages	-NA-
Bihar	Trust	Madhubani	DH	Public	Otorhinolaryngology,Obstetrics & Gynaecology,Orthopaedics,General Medicine,Emergency Room Packages,Paediatric medical management	-NA-
Bihar	Trust	Nawada	DH	Public	General Medicine,Paediatric medical management,Emergency Room Packages,Oral and Maxillofacial Surgery,Polytrauma,Urology,Orthopaedics,Obstetrics & Gynaecology,Opthalmology,General Surgery	-NA-
Bihar	Trust	Saran	DH	Public	Oral and Maxillofacial Surgery,Orthopaedics,Obstetrics & Gynaecology,Opthalmology,Otorhinolaryngology,General Surgery,General Medicine,Emergency Room Packages,Paediatric medical management	-NA-
Bihar	Trust	Lakhisarai	DH	Public	General Medicine,Emergency Room Packages,Obstetrics & Gynaecology,Neo-natal,Paediatric medical management,Opthalmology,General Surgery	-NA-
Bihar	Trust	Sheohar	DH	Public	General Medicine,Emergency Room Packages,Paediatric medical management,Opthalmology,Obstetrics & Gynaecology,Otorhinolaryngology,Orthopaedics,General Surgery	-NA-
Bihar	Trust	Muzaffarpur	DH	Public	General Surgery,Otorhinolaryngology,Opthalmology,Obstetrics & Gynaecology,Orthopaedics,Oral and Maxillofacial Surgery,General Medicine,Emergency Room Packages,Paediatric medical management	-NA-
Bihar	Trust	Sheikhpura	DH	Public	Paediatric medical management,General Medicine,Emergency Room Packages,Oral and Maxillofacial Surgery,Orthopaedics,Obstetrics & Gynaecology,Opthalmology,Otorhinolaryngology,General Surgery	-NA-
Bihar	Trust	Sitamarhi	DH	Public	Otorhinolaryngology,Opthalmology,Obstetrics & Gynaecology,General Medicine,Emergency Room Packages,Paediatric medical management,Neo-natal,Cardiology	-NA-
Bihar	Trust	Patna	DH	Public	General Surgery,Obstetrics & Gynaecology,Orthopaedics,General Medicine,Emergency Room Packages,Paediatric medical management,Neo-natal	-NA-
Bihar	Trust	Darbhanga	SDH	Public	General Surgery,Otorhinolaryngology	-NA-
Bihar	Trust	Saharsa	DH	Public	General Surgery,Opthalmology,Obstetrics & Gynaecology,Orthopaedics,General Medicine,Emergency Room Packages,Paediatric medical management	-NA-
Bihar	Trust	Araria	DH	Public	Paediatric medical management,General Medicine,Emergency Room Packages	-NA-
Bihar	Trust	Kishanganj	DH	Public	Obstetrics & Gynaecology,General Medicine,Emergency Room Packages,Paediatric medical management,Opthalmology,Otorhinolaryngology,General Surgery	-NA-
Bihar	Trust	Madhepura	DH	Public	Opthalmology,Obstetrics & Gynaecology,Otorhinolaryngology,Orthopaedics,Oral and Maxillofacial Surgery,General Medicine,Emergency Room Packages,Paediatric medical management	-NA-
Bihar	Trust	Kaimur (Bhabua)	CHC	Public	-NA-	-NA-
Bihar	Trust	Nalanda	CHC	Public	General Medicine,Emergency Room Packages,General Surgery	-NA-
Bihar	Trust	Khagaria	CHC	Public	General Surgery,General Medicine,Emergency Room Packages	-NA-
Bihar	Trust	Khagaria	CHC	Public	General Surgery,Oral and Maxillofacial Surgery	-NA-
Bihar	Trust	Nalanda	CHC	Public	Obstetrics & Gynaecology,Otorhinolaryngology,General Surgery,General Medicine,Emergency Room Packages	-NA-
Bihar	Trust	Nalanda	CHC	Public	Oral and Maxillofacial Surgery,Obstetrics & Gynaecology,General Surgery,General Medicine,Emergency Room Packages,Paediatric medical management	-NA-
Bihar	Trust	Katihar	CHC	Public	General Surgery,Obstetrics & Gynaecology,Oral and Maxillofacial Surgery,General Medicine,Emergency Room Packages	-NA-
Bihar	Trust	Katihar	CHC	Public	General Surgery,Obstetrics & Gynaecology,Oral and Maxillofacial Surgery,Paediatric cancer	-NA-
Bihar	Trust	Katihar	SDH	Public	Paediatric medical management,General Medicine,Emergency Room Packages,Oral and Maxillofacial Surgery,Medical Oncology,Urology,Paediatric surgery,Orthopaedics,Obstetrics & Gynaecology,Otorhinolaryngology,General Surgery	-NA-
Bihar	Trust	Vaishali	SDH	Public	Obstetrics & Gynaecology	-NA-
Bihar	Trust	Katihar	SDH	Public	General Medicine,Emergency Room Packages,Oral and Maxillofacial Surgery,Obstetrics & Gynaecology,General Surgery	-NA-
Bihar	Trust	Patna	CHC	Public	General Medicine,Emergency Room Packages	-NA-
Bihar	Trust	Vaishali	CHC	Public	General Surgery,Obstetrics & Gynaecology,Orthopaedics,Oral and Maxillofacial Surgery,General Medicine,Emergency Room Packages,Paediatric medical management,Neo-natal	-NA-
Bihar	Trust	Buxar	SDH	Public	Paediatric medical management,General Surgery	-NA-
Bihar	Trust	Buxar	CHC	Public	General Medicine,Emergency Room Packages,General Surgery	-NA-
Bihar	Trust	Buxar	CHC	Public	General Surgery,General Medicine,Emergency Room Packages	-NA-
Bihar	Trust	Kaimur (Bhabua)	SDH	Public	Paediatric medical management	-NA-
Bihar	Trust	Khagaria	CHC	Public	Oral and Maxillofacial Surgery	-NA-
Bihar	Trust	Buxar	CHC	Public	General Surgery,General Medicine,Emergency Room Packages	-NA-
Bihar	Trust	Arwal	CHC	Public	General Surgery	-NA-
Bihar	Trust	Banka	CHC	Public	General Medicine,Emergency Room Packages,Obstetrics & Gynaecology,General Surgery	-NA-
Bihar	Trust	Kishanganj	CHC	Public	General Medicine,Emergency Room Packages	-NA-
Bihar	Trust	Vaishali	CHC	Public	Obstetrics & Gynaecology	-NA-
Bihar	Trust	Gopalganj	CHC	Public	General Medicine,Emergency Room Packages	-NA-
Bihar	Trust	Katihar	CHC	Public	General Surgery	-NA-
Bihar	Trust	Bhagalpur	CHC	Public	General Surgery	-NA-
Bihar	Trust	Vaishali	CHC	Public	Obstetrics & Gynaecology	-NA-
Bihar	Trust	Lakhisarai	CHC	Public	Paediatric medical management,General Medicine,Emergency Room Packages,Oral and Maxillofacial Surgery,Orthopaedics,General Surgery	-NA-
Bihar	Trust	Katihar	CHC	Public	General Surgery	-NA-
Bihar	Trust	Bhagalpur	CHC	Public	General Surgery,Paediatric medical management,Obstetrics & Gynaecology	-NA-
Bihar	Trust	Bhagalpur	CHC	Public	General Medicine,Emergency Room Packages	-NA-
Bihar	Trust	Bhagalpur	CHC	Public	General Medicine,Emergency Room Packages	-NA-
Bihar	Trust	Bhagalpur	CHC	Public	General Medicine,Emergency Room Packages	-NA-
Bihar	Trust	Gopalganj	CHC	Public	General Medicine,Emergency Room Packages	-NA-
Bihar	Trust	Bhagalpur	CHC	Public	Oral and Maxillofacial Surgery,General Medicine,Emergency Room Packages	-NA-
Bihar	Trust	Gopalganj	CHC	Public	General Medicine,Emergency Room Packages,General Surgery	-NA-
Bihar	Trust	Gopalganj	CHC	Public	Oral and Maxillofacial Surgery	-NA-
Bihar	Trust	Jehanabad	CHC	Public	General Medicine,Emergency Room Packages	-NA-
Bihar	Trust	Jehanabad	CHC	Public	General Medicine,Emergency Room Packages	-NA-
Bihar	Trust	Jehanabad	CHC	Public	General Medicine,Emergency Room Packages	-NA-
Bihar	Trust	Purbi Champaran	CHC	Public	Paediatric medical management,Oral and Maxillofacial Surgery,General Surgery	-NA-
Bihar	Trust	Jehanabad	CHC	Public	General Medicine,Emergency Room Packages,General Surgery,Obstetrics & Gynaecology
Bihar	Trust	Vaishali	CHC	Public	Obstetrics & Gynaecology	-NA-
Bihar	Trust	Gopalganj	SDH	Public	Oral and Maxillofacial Surgery,Obstetrics & Gynaecology	-NA-
Bihar	Trust	Araria	SDH	Public	Paediatric medical management,General Surgery	-NA-
Bihar	Trust	Vaishali	CHC	Public	Obstetrics & Gynaecology	-NA-
Bihar	Trust	Nalanda	CHC	Public	General Medicine,Emergency Room Packages,General Surgery	-NA-
Bihar	Trust	Nalanda	SDH	Public	General Surgery,Obstetrics & Gynaecology,Oral and Maxillofacial Surgery,General Medicine,Emergency Room Packages	-NA-
Bihar	Trust	Nalanda	SDH	Public	General Surgery,Obstetrics & Gynaecology,Oral and Maxillofacial Surgery,General Medicine,Emergency Room Packages	-NA-
Bihar	Trust	Nalanda	CHC	Public	General Medicine,Emergency Room Packages,Oral and Maxillofacial Surgery,Obstetrics & Gynaecology,General Surgery	-NA-
Bihar	Trust	Nalanda	CHC	Public	Paediatric medical management,General Medicine,Emergency Room Packages,Oral and Maxillofacial Surgery,Obstetrics & Gynaecology,General Surgery	-NA-
Bihar	Trust	Araria	CHC	Public	General Surgery	-NA-
Bihar	Trust	Jehanabad	CHC	Public	General Medicine,Emergency Room Packages	-NA-
Bihar	Trust	Kaimur (Bhabua)	CHC	Public	General Surgery	-NA-
Bihar	Trust	Kaimur (Bhabua)	CHC	Public	General Surgery	-NA-
Bihar	Trust	Saran	CHC	Public	Oral and Maxillofacial Surgery	-NA-
Bihar	Trust	Siwan	CHC	Public	-NA-	-NA-
Bihar	Trust	Saran	CHC	Public	Paediatric medical management	-NA-
Bihar	Trust	Siwan	CHC	Public	General Medicine,Emergency Room Packages	-NA-
Bihar	Trust	Siwan	PHC	Public	-NA-	-NA-
Bihar	Trust	Siwan	CHC	Public	-NA-	-NA-
Bihar	Trust	Sitamarhi	PHC	Public	General Surgery	-NA-
Bihar	Trust	Siwan	CHC	Public	General Medicine,Emergency Room Packages	-NA-
Bihar	Trust	Nawada	SDH	Public	Opthalmology,Oral and Maxillofacial Surgery,Orthopaedics	-NA-
Bihar	Trust	Muzaffarpur	PHC	Public	Obstetrics & Gynaecology	-NA-
Bihar	Trust	Saran	CHC	Public	General Surgery	-NA-
Bihar	Trust	Siwan	CHC	Public	Paediatric medical management,General Surgery,Obstetrics & Gynaecology
Bihar	Trust	Nalanda	CHC	Public	General Medicine,Emergency Room Packages,Obstetrics & Gynaecology,General Surgery	-NA-
Bihar	Trust	Madhubani	PHC	Public	General Medicine,Emergency Room Packages	-NA-
Bihar	Trust	Siwan	CHC	Public	Oral and Maxillofacial Surgery	-NA-
Bihar	Trust	Lakhisarai	CHC	Public	General Medicine,Emergency Room Packages,Oral and Maxillofacial Surgery,General Surgery	-NA-
Bihar	Trust	Sitamarhi	CHC	Public	General Medicine,Emergency Room Packages,Obstetrics & Gynaecology,General Surgery	-NA-
Bihar	Trust	Muzaffarpur	CHC	Public	Obstetrics & Gynaecology	-NA-
Bihar	Trust	Patna	SDH	Public	General Surgery,Otorhinolaryngology,Opthalmology,Obstetrics & Gynaecology,Orthopaedics,Oral and Maxillofacial Surgery,General Medicine,Emergency Room Packages,Paediatric medical management	-NA-
Bihar	Trust	Patna	SDH	Public	Paediatric medical management,General Medicine,Emergency Room Packages,Obstetrics & Gynaecology,Opthalmology	-NA-
Bihar	Trust	Patna	SDH	Public	General Medicine,Emergency Room Packages,Obstetrics & Gynaecology,Otorhinolaryngology,General Surgery	-NA-
Bihar	Trust	Patna	CHC	Public	Oral and Maxillofacial Surgery,Orthopaedics,Obstetrics & Gynaecology,Otorhinolaryngology,General Surgery,General Medicine,Emergency Room Packages,Paediatric medical management	-NA-
Bihar	Trust	Patna	CHC	Public	General Surgery	-NA-
Bihar	Trust	Patna	SDH	Public	Paediatric medical management,General Surgery,Obstetrics & Gynaecology,General Medicine,Emergency Room Packages	-NA-
Bihar	Trust	Patna	PHC	Public	Opthalmology,Obstetrics & Gynaecology,General Surgery,General Medicine,Emergency Room Packages,Oral and Maxillofacial Surgery,Orthopaedics	-NA-
Bihar	Trust	Patna	PHC	Public	Obstetrics & Gynaecology	-NA-
Bihar	Trust	Patna	CHC	Public	Obstetrics & Gynaecology,General Medicine,Emergency Room Packages	-NA-
Bihar	Trust	Nalanda	PHC	Public	General Surgery,General Medicine,Emergency Room Packages	-NA-
Bihar	Trust	Jamui	PHC	Public	General Medicine,Emergency Room Packages	-NA-
Bihar	Trust	Vaishali	PHC	Public	Obstetrics & Gynaecology	-NA-
Bihar	Trust	Bhojpur	CHC	Public	Oral and Maxillofacial Surgery,General Medicine,Emergency Room Packages,General Surgery	-NA-
Bihar	Trust	Darbhanga	CHC	Public	General Surgery,Oral and Maxillofacial Surgery,General Medicine,Emergency Room Packages	-NA-
Bihar	Trust	Darbhanga	PHC	Public	Paediatric medical management,General Medicine,Emergency Room Packages,Oral and Maxillofacial Surgery	-NA-
Bihar	Trust	Madhepura	PHC	Public	General Medicine,Emergency Room Packages	-NA-
Bihar	Trust	Bhojpur	CHC	Public	General Medicine,Emergency Room Packages,Oral and Maxillofacial Surgery	-NA-
Bihar	Trust	Vaishali	PHC	Public	Obstetrics & Gynaecology	-NA-
Bihar	Trust	Vaishali	PHC	Public	Obstetrics & Gynaecology	-NA-
Bihar	Trust	Vaishali	PHC	Public	Obstetrics & Gynaecology	-NA-
Bihar	Trust	Vaishali	CHC	Public	Obstetrics & Gynaecology	-NA-
Bihar	Trust	Kishanganj	PHC	Public	General Medicine,Emergency Room Packages	-NA-
Bihar	Trust	Kishanganj	PHC	Public	General Medicine,Emergency Room Packages	-NA-
Bihar	Trust	Vaishali	PHC	Public	Obstetrics & Gynaecology	-NA-
Bihar	Trust	Gopalganj	PHC	Public	Orthopaedics	-NA-
Bihar	Trust	Gopalganj	PHC	Public	General Surgery	-NA-
Bihar	Trust	Nawada	PHC	Public	General Medicine,Emergency Room Packages	-NA-
Bihar	Trust	Gopalganj	PHC	Public	General Surgery	-NA-
Bihar	Trust	Gopalganj	PHC	Public	General Medicine,Emergency Room Packages,Oral and Maxillofacial Surgery,General Surgery	-NA-
Bihar	Trust	Buxar	PHC	Public	Paediatric medical management	-NA-
Bihar	Trust	Gopalganj	PHC	Public	General Medicine,Emergency Room Packages	-NA-
Bihar	Trust	Vaishali	PHC	Public	Obstetrics & Gynaecology	-NA-
Bihar	Trust	Gopalganj	PHC	Public	-NA-	-NA-
Bihar	Trust	Vaishali	PHC	Public	Obstetrics & Gynaecology	-NA-
Bihar	Trust	Nawada	PHC	Public	General Medicine,Emergency Room Packages	-NA-
Bihar	Trust	Gopalganj	PHC	Public	General Surgery	-NA-
Bihar	Trust	Lakhisarai	CHC	Public	Paediatric medical management,General Medicine,Emergency Room Packages,Oral and Maxillofacial Surgery,Orthopaedics,General Surgery	-NA-
Bihar	Trust	Supaul	PHC	Public	Obstetrics & Gynaecology	-NA-
Bihar	Trust	Supaul	SDH	Public	Obstetrics & Gynaecology	-NA-
Bihar	Trust	Supaul	CHC	Public	Obstetrics & Gynaecology	-NA-
Bihar	Trust	Supaul	PHC	Public	General Surgery	-NA-
Bihar	Trust	Supaul	PHC	Public	General Surgery	-NA-
Bihar	Trust	Supaul	PHC	Public	Obstetrics & Gynaecology	-NA-
Bihar	Trust	Supaul	PHC	Public	Obstetrics & Gynaecology	-NA-
Bihar	Trust	Supaul	PHC	Public	General Surgery	-NA-
Bihar	Trust	Supaul	PHC	Public	Obstetrics & Gynaecology	-NA-
Bihar	Trust	Lakhisarai	PHC	Public	General Surgery,General Medicine,Emergency Room Packages	-NA-
Bihar	Trust	Siwan	PHC	Public	General Medicine,Emergency Room Packages	-NA-
Bihar	Trust	Muzaffarpur	PHC	Public	-NA-
Bihar	Trust	Siwan	PHC	Public	General Surgery	-NA-
Bihar	Trust	Vaishali	PHC	Public	Obstetrics & Gynaecology	-NA-
Bihar	Trust	Gaya	PHC	Public	General Medicine,Emergency Room Packages	-NA-
Bihar	Trust	Gaya	PHC	Public	General Medicine,Emergency Room Packages	-NA-
Bihar	Trust	Madhubani	PHC	Public	Oral and Maxillofacial Surgery	-NA-
Bihar	Trust	Madhubani	PHC	Public	Oral and Maxillofacial Surgery	-NA-
Bihar	Trust	Gaya	PHC	Public	General Medicine,Emergency Room Packages	-NA-
Bihar	Trust	Lakhisarai	PHC	Public	General Medicine,Emergency Room Packages,General Surgery	-NA-
Bihar	Trust	Saran	CHC	Public	Obstetrics & Gynaecology	-NA-
Bihar	Trust	Madhubani	SDH	Public	General Surgery	-NA-
Bihar	Trust	Arwal	PHC	Public	General Medicine,Emergency Room Packages	-NA-
Bihar	Trust	Nalanda	PHC	Public	General Medicine,Emergency Room Packages,General Surgery	-NA-
Bihar	Trust	Siwan	CHC	Public	-NA-	-NA-
Bihar	Trust	Saran	CHC	Public	Obstetrics & Gynaecology	-NA-
Bihar	Trust	Madhubani	SDH	Public	General Surgery	-NA-
Bihar	Trust	Sitamarhi	PHC	Public	General Medicine,Emergency Room Packages	-NA-
Bihar	Trust	Saran	CHC	Public	Otorhinolaryngology	-NA-
Bihar	Trust	Siwan	CHC	Public	Oral and Maxillofacial Surgery,Obstetrics & Gynaecology	-NA-
Bihar	Trust	Madhubani	PHC	Public	Oral and Maxillofacial Surgery	-NA-
Bihar	Trust	Siwan	CHC	Public	-NA-	-NA-
Bihar	Trust	Madhubani	PHC	Public	General Medicine,Emergency Room Packages	-NA-
Bihar	Trust	Nawada	PHC	Public	Oral and Maxillofacial Surgery	-NA-
Bihar	Trust	Madhubani	SDH	Public	General Surgery	-NA-
Bihar	Trust	Vaishali	PHC	Public	Obstetrics & Gynaecology	-NA-
Bihar	Trust	Madhubani	PHC	Public	Oral and Maxillofacial Surgery	-NA-
Bihar	Trust	Vaishali	PHC	Public	Obstetrics & Gynaecology	-NA-
Bihar	Trust	Madhubani	PHC	Public	Oral and Maxillofacial Surgery	-NA-
Bihar	Trust	Siwan	PHC	Public	Oral and Maxillofacial Surgery	-NA-
Bihar	Trust	Jamui	CHC	Public	General Medicine,Emergency Room Packages,Obstetrics & Gynaecology	-NA-
Bihar	Trust	Nawada	PHC	Public	General Surgery	-NA-
Bihar	Trust	Madhubani	PHC	Public	General Medicine,Emergency Room Packages	-NA-
Bihar	Trust	Madhubani	PHC	Public	General Surgery	-NA-
Bihar	Trust	Madhubani	PHC	Public	General Surgery	-NA-
Bihar	Trust	Madhubani	PHC	Public	Oral and Maxillofacial Surgery	-NA-
Bihar	Trust	Madhubani	PHC	Public	-NA-	-NA-
Bihar	Trust	Madhubani	PHC	Public	-NA-	-NA-
Bihar	Trust	Aurangabad	SDH	Public	Polytrauma,Obstetrics & Gynaecology,General Surgery	-NA-
Bihar	Trust	Aurangabad	CHC	Public	Polytrauma	-NA-
Bihar	Trust	Rohtas	CHC	Public	Obstetrics & Gynaecology	-NA-
Bihar	Trust	Rohtas	SDH	Public	General Medicine,Emergency Room Packages	-NA-
Bihar	Trust	Rohtas	SDH	Public	Paediatric medical management,Oral and Maxillofacial Surgery,Obstetrics & Gynaecology	-NA-
Bihar	Trust	Rohtas	CHC	Public	General Medicine,Emergency Room Packages	-NA-
Bihar	Trust	Rohtas	CHC	Public	General Medicine,Emergency Room Packages	-NA-
Bihar	Trust	Kaimur (Bhabua)	CHC	Public	General Surgery	-NA-
Bihar	Trust	Sheohar	PHC	Public	General Medicine,Emergency Room Packages	-NA-
Bihar	Trust	Sheohar	PHC	Public	General Medicine,Emergency Room Packages,Oral and Maxillofacial Surgery	-NA-
Bihar	Trust	Sheohar	PHC	Public	General Medicine,Emergency Room Packages	-NA-
Bihar	Trust	Muzaffarpur	PHC	Public	Obstetrics & Gynaecology	-NA-
Bihar	Trust	Gaya	PHC	Public	General Medicine,Emergency Room Packages	-NA-
Bihar	Trust	Muzaffarpur	PHC	Public	Oral and Maxillofacial Surgery	-NA-
Bihar	Trust	Muzaffarpur	CHC	Public	Obstetrics & Gynaecology	-NA-
Bihar	Trust	Gaya	PHC	Public	General Medicine,Emergency Room Packages	-NA-
Bihar	Trust	Begusarai	PHC	Public	General Surgery	-NA-
Bihar	Trust	Gaya	PHC	Public	General Medicine,Emergency Room Packages	-NA-
Bihar	Trust	Siwan	CHC	Public	-NA-	-NA-
Bihar	Trust	Gaya	SDH	Public	Obstetrics & Gynaecology	-NA-
Bihar	Trust	Saran	CHC	Public	Obstetrics & Gynaecology	-NA-
Bihar	Trust	Begusarai	PHC	Public	Obstetrics & Gynaecology,General Medicine,Emergency Room Packages,Oral and Maxillofacial Surgery	-NA-
Bihar	Trust	Muzaffarpur	PHC	Public	Obstetrics & Gynaecology	-NA-
Bihar	Trust	Madhepura	PHC	Public	General Medicine,Neo-natal,Polytrauma,Plastic & reconstructive,Burns management,Radiation Oncology,Medical Oncology,Surgical Oncology,Neurosurgery,Interventional Neuroradiology,Cardio-thoracic & Vascular surgery,Obstetrics & Gynaecology,General Surgery	-NA-
Bihar	Trust	Begusarai	PHC	Public	General Surgery	-NA-
Bihar	Trust	Siwan	PHC	Public	Oral and Maxillofacial Surgery	-NA-
Bihar	Trust	Begusarai	PHC	Public	Opthalmology	-NA-
Bihar	Trust	Begusarai	PHC	Public	General Surgery	-NA-
Bihar	Trust	Samastipur	SDH	Public	General Medicine,Emergency Room Packages,Oral and Maxillofacial Surgery,Obstetrics & Gynaecology,General Surgery	-NA-
Bihar	Trust	Gaya	PHC	Public	General Medicine,Emergency Room Packages	-NA-
Bihar	Trust	Samastipur	CHC	Public	General Medicine,Emergency Room Packages,General Surgery,Oral and Maxillofacial Surgery	-NA-
Bihar	Trust	Samastipur	PHC	Public	General Medicine,Emergency Room Packages,Oral and Maxillofacial Surgery,General Surgery	-NA-
Bihar	Trust	Siwan	CHC	Public	Opthalmology	-NA-
Bihar	Trust	Begusarai	PHC	Public	General Surgery	-NA-
Bihar	Trust	Katihar	PHC	Public	General Medicine,Emergency Room Packages	-NA-
Bihar	Trust	Darbhanga	PHC	Public	General Surgery,Oral and Maxillofacial Surgery,General Medicine,Emergency Room Packages	-NA-
Bihar	Trust	Buxar	PHC	Public	General Medicine,Emergency Room Packages,General Surgery,Obstetrics & Gynaecology
Bihar	Trust	Begusarai	PHC	Public	Orthopaedics	-NA-
Bihar	Trust	Buxar	PHC	Public	General Surgery	-NA-
Bihar	Trust	Begusarai	PHC	Public	General Surgery	-NA-
Bihar	Trust	Patna	CHC	Public	General Medicine,Emergency Room Packages,Opthalmology,General Surgery	-NA-
Bihar	Trust	Muzaffarpur	CHC	Public	Obstetrics & Gynaecology	-NA-
Bihar	Trust	Begusarai	PHC	Public	General Surgery	-NA-
Bihar	Trust	Samastipur	PHC	Public	General Medicine,Emergency Room Packages,General Surgery	-NA-
Bihar	Trust	Buxar	PHC	Public	General Medicine,Emergency Room Packages	-NA-
Bihar	Trust	Rohtas	PHC	Public	Paediatric medical management	-NA-
Bihar	Trust	Samastipur	PHC	Public	General Medicine,Emergency Room Packages,Oral and Maxillofacial Surgery,General Surgery	-NA-
Bihar	Trust	Darbhanga	CHC	Public	General Medicine,Emergency Room Packages,Oral and Maxillofacial Surgery,General Surgery	-NA-
Bihar	Trust	Kishanganj	PHC	Public	Oral and Maxillofacial Surgery	-NA-
Bihar	Trust	Kishanganj	PHC	Public	General Medicine,Emergency Room Packages	-NA-
Bihar	Trust	Kishanganj	PHC	Public	General Medicine,Emergency Room Packages	-NA-
Bihar	Trust	Begusarai	PHC	Public	General Surgery	-NA-
Bihar	Trust	Muzaffarpur	PHC	Public	Oral and Maxillofacial Surgery	-NA-
Bihar	Trust	Rohtas	PHC	Public	Oral and Maxillofacial Surgery
Bihar	Trust	Gaya	PHC	Public	General Medicine,Emergency Room Packages	-NA-
Bihar	Trust	Aurangabad	CHC	Public	General Medicine,Emergency Room Packages,Polytrauma	-NA-
Bihar	Trust	Munger	PHC	Public	General Medicine,Emergency Room Packages	-NA-
Bihar	Trust	Darbhanga	PHC	Public	Obstetrics & Gynaecology,General Surgery,General Medicine,Emergency Room Packages	-NA-
Bihar	Trust	Purnia	SDH	Public	General Medicine,Emergency Room Packages,General Surgery,Paediatric medical management	-NA-
Bihar	Trust	Gaya	PHC	Public	General Medicine,Emergency Room Packages	-NA-
Bihar	Trust	Begusarai	PHC	Public	General Medicine,Emergency Room Packages	-NA-
Bihar	Trust	Bhagalpur	SDH	Public	Obstetrics & Gynaecology,Oral and Maxillofacial Surgery,General Medicine,Emergency Room Packages,Paediatric medical management	-NA-
Bihar	Trust	Munger	PHC	Public	-NA-	-NA-
Bihar	Trust	Purnia	PHC	Public	General Medicine,Emergency Room Packages,General Surgery,Obstetrics & Gynaecology
Bihar	Trust	Gaya	PHC	Public	General Medicine,Emergency Room Packages	-NA-
Bihar	Trust	Nalanda	PHC	Public	General Medicine,Emergency Room Packages	-NA-
Bihar	Trust	Bhagalpur	PHC	Public	General Medicine,Emergency Room Packages	-NA-
Bihar	Trust	Siwan	PHC	Public	Paediatric medical management,General Medicine,Emergency Room Packages,Obstetrics & Gynaecology,General Surgery	-NA-
Bihar	Trust	Gaya	PHC	Public	General Medicine,Emergency Room Packages	-NA-
Bihar	Trust	Purnia	CHC	Public	General Medicine,Emergency Room Packages	-NA-
Bihar	Trust	Gopalganj	PHC	Public	General Medicine,Emergency Room Packages,Oral and Maxillofacial Surgery,General Surgery	-NA-
Bihar	Trust	Nalanda	PHC	Public	Paediatric medical management,General Medicine,Emergency Room Packages,Obstetrics & Gynaecology,General Surgery	-NA-
Bihar	Trust	Gaya	PHC	Public	General Medicine,Emergency Room Packages	-NA-
Bihar	Trust	Madhepura	PHC	Public	General Surgery	-NA-
Bihar	Trust	Samastipur	PHC	Public	General Medicine,Emergency Room Packages,General Surgery	-NA-
Bihar	Trust	Gaya	SDH	Public	General Medicine,Emergency Room Packages	-NA-
Bihar	Trust	Bhojpur	SDH	Public	General Medicine,Emergency Room Packages,Oral and Maxillofacial Surgery,Radiation Oncology,General Surgery	-NA-
Bihar	Trust	Munger	PHC	Public	Oral and Maxillofacial Surgery	-NA-
Bihar	Trust	Nalanda	PHC	Public	General Medicine,Emergency Room Packages,General Surgery	-NA-
Bihar	Trust	Samastipur	SDH	Public	Paediatric medical management,General Medicine,Emergency Room Packages,Oral and Maxillofacial Surgery,General Surgery	-NA-
Bihar	Trust	Gaya	PHC	Public	General Medicine,Emergency Room Packages	-NA-
Bihar	Trust	Gaya	PHC	Public	General Medicine,Emergency Room Packages	-NA-
Bihar	Trust	Purnia	SDH	Public	General Surgery,Paediatric medical management,Obstetrics & Gynaecology,Oral and Maxillofacial Surgery,General Medicine,Emergency Room Packages	-NA-
Bihar	Trust	Gaya	PHC	Public	General Medicine,Emergency Room Packages	-NA-
Bihar	Trust	Aurangabad	CHC	Public	Polytrauma	NA
Bihar	Trust	Darbhanga	CHC	Public	General Medicine,Emergency Room Packages,Oral and Maxillofacial Surgery,Medical Oncology,Paediatric surgery,Orthopaedics,General Surgery	-NA-
Bihar	Trust	Gaya	PHC	Public	General Medicine,Emergency Room Packages	-NA-
Bihar	Trust	Gaya	PHC	Public	General Medicine,Emergency Room Packages	-NA-
Bihar	Trust	Kishanganj	PHC	Public	-NA-	-NA-
Bihar	Trust	Begusarai	PHC	Public	General Medicine,Emergency Room Packages	-NA-
Bihar	Trust	Munger	SDH	Public	Obstetrics & Gynaecology,General Surgery	-NA-
Bihar	Trust	Rohtas	PHC	Public	General Medicine,Emergency Room Packages	-NA-
Bihar	Trust	Katihar	PHC	Public	General Medicine,Emergency Room Packages	-NA-
Bihar	Trust	Katihar	PHC	Public	General Medicine,Emergency Room Packages	-NA-
Bihar	Trust	Gaya	PHC	Public	General Medicine,Emergency Room Packages,General Surgery	-NA-
Bihar	Trust	Nalanda	PHC	Public	General Medicine,Emergency Room Packages,General Surgery	-NA-
Bihar	Trust	Aurangabad	CHC	Public	Polytrauma	-NA-
Bihar	Trust	Rohtas	CHC	Public	General Medicine,Emergency Room Packages	-NA-
Bihar	Trust	Rohtas	CHC	Public	General Medicine,Emergency Room Packages	-NA-
Bihar	Trust	Begusarai	PHC	Public	General Surgery	-NA-
Bihar	Trust	Begusarai	PHC	Public	General Surgery	-NA-
Bihar	Trust	Rohtas	PHC	Public	General Medicine,Emergency Room Packages	-NA-
Bihar	Trust	Purbi Champaran	CHC	Public	-NA-	-NA-
Bihar	Trust	Saran	CHC	Public	Obstetrics & Gynaecology
Bihar	Trust	Purbi Champaran	CHC	Public	-NA-	-NA-
Bihar	Trust	Purbi Champaran	CHC	Public	-NA-	-NA-
Bihar	Trust	Purbi Champaran	CHC	Public	-NA-	-NA-
Bihar	Trust	Purbi Champaran	CHC	Public	General Medicine,Emergency Room Packages,Oral and Maxillofacial Surgery,Obstetrics & Gynaecology,General Surgery	-NA-
Bihar	Trust	Muzaffarpur	PHC	Public	Obstetrics & Gynaecology	-NA-
Bihar	Trust	Munger	PHC	Public	General Surgery	-NA-
Bihar	Trust	Purbi Champaran	CHC	Public	General Medicine,Emergency Room Packages	-NA-
Bihar	Trust	Purbi Champaran	CHC	Public	General Medicine,Emergency Room Packages	-NA-
Bihar	Trust	Purbi Champaran	CHC	Public	General Medicine,Emergency Room Packages	-NA-
Bihar	Trust	Purbi Champaran	CHC	Public	General Medicine,Emergency Room Packages	-NA-
Bihar	Trust	Purbi Champaran	CHC	Public	General Surgery	-NA-
Bihar	Trust	Purbi Champaran	CHC	Public	General Surgery	-NA-
Bihar	Trust	Purbi Champaran	PHC	Public	General Surgery	-NA-
Bihar	Trust	Purbi Champaran	PHC	Public	General Medicine,Emergency Room Packages	-NA-
Bihar	Trust	Purbi Champaran	PHC	Public	General Surgery	-NA-
Bihar	Trust	Purbi Champaran	CHC	Public	General Medicine,Emergency Room Packages,General Surgery,Obstetrics & Gynaecology,Oral and Maxillofacial Surgery	-NA-
Bihar	Trust	Rohtas	PHC	Public	General Medicine,Emergency Room Packages	-NA-
Bihar	Trust	Rohtas	PHC	Public	General Medicine,Emergency Room Packages	-NA-
Bihar	Trust	Bhagalpur	SDH	Public	General Medicine,Emergency Room Packages,Paediatric medical management,Obstetrics & Gynaecology,General Surgery	-NA-
Bihar	Trust	Bhagalpur	PHC	Public	General Medicine,Emergency Room Packages	-NA-
Bihar	Trust	Bhagalpur	PHC	Public	General Medicine,Emergency Room Packages	NA
Bihar	Trust	Pashchim Champaran	PHC	Public	General Medicine,Emergency Room Packages,Obstetrics & Gynaecology,General Surgery	-NA-
Bihar	Trust	Pashchim Champaran	PHC	Public	General Medicine,Emergency Room Packages,Obstetrics & Gynaecology,General Surgery	-NA-
Bihar	Trust	Bhagalpur	CHC	Public	General Medicine,Emergency Room Packages	-NA-
Bihar	Trust	Rohtas	PHC	Public	General Medicine,Emergency Room Packages	-NA-
Bihar	Trust	Patna	PHC	Public	-NA-	-NA-
Bihar	Trust	Bhagalpur	PHC	Public	General Medicine,Emergency Room Packages
Bihar	Trust	Saran	CHC	Public	General Surgery	-NA-
Bihar	Trust	Nawada	SDH	Public	General Surgery	-NA-
Bihar	Trust	Saran	CHC	Public	General Medicine,Emergency Room Packages	-NA-
Bihar	Trust	Saran	CHC	Public	General Medicine,Emergency Room Packages	-NA-
Bihar	Trust	Gaya	PHC	Public	General Medicine,Emergency Room Packages	-NA-
Bihar	Trust	Gaya	PHC	Public	General Medicine,Emergency Room Packages	-NA-
Bihar	Trust	Gaya	PHC	Public	General Medicine,Emergency Room Packages	-NA-
Bihar	Trust	Gaya	PHC	Public	General Medicine,Emergency Room Packages	-NA-
Bihar	Trust	Bhagalpur	CHC	Public	Paediatric medical management,General Surgery	-NA-
Bihar	Trust	Bhagalpur	PHC	Public	General Medicine,Emergency Room Packages	-NA-
Bihar	Trust	Bhagalpur	PHC	Public	General Medicine,Emergency Room Packages	-NA-
Bihar	Trust	Araria	PHC	Public	General Medicine,Emergency Room Packages	-NA-
Bihar	Trust	Samastipur	PHC	Public	General Surgery	-NA-
Bihar	Trust	Purnia	PHC	Public	General Medicine,Emergency Room Packages	-NA-
Bihar	Trust	Samastipur	PHC	Public	General Surgery,General Medicine,Emergency Room Packages	-NA-
Bihar	Trust	Araria	PHC	Public	General Medicine,Emergency Room Packages	-NA-
Bihar	Trust	Muzaffarpur	PHC	Public	General Medicine,Emergency Room Packages	-NA-
Bihar	Trust	Samastipur	CHC	Public	General Medicine,Emergency Room Packages,General Surgery	-NA-
Bihar	Trust	Munger	PHC	Public	-NA-	-NA-
Bihar	Trust	Banka	CHC	Public	General Surgery,General Medicine,Emergency Room Packages	-NA-
Bihar	Trust	Banka	CHC	Public	General Surgery	-NA-
Bihar	Trust	Banka	PHC	Public	Obstetrics & Gynaecology	-NA-
Bihar	Trust	Banka	PHC	Public	General Surgery,General Medicine,Emergency Room Packages	-NA-
Bihar	Trust	Banka	PHC	Public	General Medicine,Emergency Room Packages	-NA-
Bihar	Trust	Banka	PHC	Public	General Surgery,Obstetrics & Gynaecology	-NA-
Bihar	Trust	Banka	PHC	Public	General Medicine,Emergency Room Packages,General Surgery	-NA-
Bihar	Trust	Banka	PHC	Public	General Medicine,Emergency Room Packages,General Surgery	-NA-
Bihar	Trust	Aurangabad	CHC	Public	Polytrauma,General Surgery	-NA-
Bihar	Trust	Aurangabad	CHC	Public	Polytrauma	-NA-
Bihar	Trust	Aurangabad	CHC	Public	Polytrauma,General Surgery	-NA-
Bihar	Trust	Aurangabad	CHC	Public	Polytrauma	-NA-
Bihar	Trust	Aurangabad	PHC	Public	Polytrauma	-NA-
Bihar	Trust	Aurangabad	PHC	Public	Polytrauma	-NA-
Bihar	Trust	Nalanda	CHC	Public	General Medicine,Emergency Room Packages,General Surgery	-NA-
Bihar	Trust	Nalanda	PHC	Public	Paediatric medical management,General Medicine,Emergency Room Packages,General Surgery	-NA-
Bihar	Trust	Nalanda	PHC	Public	General Medicine,Emergency Room Packages,General Surgery	-NA-
Bihar	Trust	Nalanda	PHC	Public	General Medicine,Emergency Room Packages,General Surgery	-NA-
Bihar	Trust	Nalanda	PHC	Public	Obstetrics & Gynaecology,General Medicine,Emergency Room Packages,General Surgery	-NA-
Bihar	Trust	Samastipur	PHC	Public	General Surgery	-NA-
Bihar	Trust	Samastipur	SDH	Public	General Surgery,General Medicine,Emergency Room Packages,Paediatric medical management	-NA-
Bihar	Trust	Samastipur	PHC	Public	General Medicine,Emergency Room Packages,General Surgery,General Surgery,Obstetrics & Gynaecology,Oral and Maxillofacial Surgery,Paediatric medical management
Bihar	Trust	Samastipur	SDH	Public	Paediatric medical management,General Medicine,Emergency Room Packages,Oral and Maxillofacial Surgery,General Surgery	-NA-
Bihar	Trust	Jamui	PHC	Public	-NA-	-NA-
Bihar	Trust	Purnia	PHC	Public	-NA-	-NA-
Bihar	Trust	Munger	PHC	Public	Oral and Maxillofacial Surgery	-NA-
Bihar	Trust	Muzaffarpur	CHC	Public	General Surgery	-NA-
Bihar	Trust	Sheikhpura	PHC	Public	Oral and Maxillofacial Surgery,General Surgery	-NA-
Bihar	Trust	Sheikhpura	PHC	Public	Obstetrics & Gynaecology,Plastic & reconstructive,Burns management	-NA-
Bihar	Trust	Sheikhpura	PHC	Public	General Surgery	-NA-
Bihar	Trust	Jamui	PHC	Public	General Medicine,Emergency Room Packages	-NA-
Bihar	Trust	Jamui	PHC	Public	General Medicine,Emergency Room Packages	-NA-
Bihar	Trust	Munger	PHC	Public	Oral and Maxillofacial Surgery	-NA-
Bihar	Trust	Sitamarhi	CHC	Public	General Medicine,Emergency Room Packages	-NA-
Bihar	Trust	Nawada	PHC	Public	General Surgery	-NA-
Bihar	Trust	Purnia	PHC	Public	General Medicine,Emergency Room Packages,Oral and Maxillofacial Surgery,General Surgery	-NA-
Bihar	Trust	Nawada	PHC	Public	General Surgery,Oral and Maxillofacial Surgery,General Medicine,Emergency Room Packages	-NA-
Bihar	Trust	Purnia	PHC	Public	General Medicine,Emergency Room Packages	-NA-
Bihar	Trust	Nawada	PHC	Public	General Medicine,Emergency Room Packages	-NA-
Bihar	Trust	Purnia	PHC	Public	General Medicine,Emergency Room Packages	-NA-
Bihar	Trust	Purnia	PHC	Public	General Medicine,Emergency Room Packages	-NA-
Bihar	Trust	Nawada	PHC	Public	General Surgery	-NA-
Bihar	Trust	Purnia	CHC	Public	General Medicine,Emergency Room Packages	-NA-
Bihar	Trust	Purnia	PHC	Public	General Medicine,Emergency Room Packages
Bihar	Trust	Patna		Private (For Profit)	Paediatric medical management,Cardiology,General Medicine,Urology,Neurosurgery,General Surgery,Otorhinolaryngology,Obstetrics & Gynaecology,Orthopaedics,Interventional Neuroradiology,Medical Oncology,Polytrauma,Oral and Maxillofacial Surgery,Emergency Room Packages	NA
Bihar	Trust	Patna		Private (For Profit)	Cardiology	NA
Bihar	Trust	Darbhanga	PHC	Public	General Surgery,Oral and Maxillofacial Surgery,General Medicine,Emergency Room Packages	-NA-
Bihar	Trust	Begusarai	CHC	Public	General Surgery	-NA-
Bihar	Trust	Darbhanga	CHC	Public	General Surgery,Oral and Maxillofacial Surgery,General Medicine,Emergency Room Packages	-NA-
Bihar	Trust	Darbhanga	PHC	Public	Oral and Maxillofacial Surgery,General Surgery,General Medicine,Emergency Room Packages	-NA-
Bihar	Trust	Darbhanga	PHC	Public	General Medicine,Emergency Room Packages,Oral and Maxillofacial Surgery	-NA-
Bihar	Trust	Darbhanga	CHC	Public	Paediatric medical management,General Medicine,Emergency Room Packages,Oral and Maxillofacial Surgery,General Surgery	-NA-
Bihar	Trust	Darbhanga	CHC	Public	General Medicine,Emergency Room Packages,Oral and Maxillofacial Surgery,General Surgery	-NA-
Bihar	Trust	Patna		Private (Not for Profit)	General Medicine,Emergency Room Packages,Radiation Oncology,Medical Oncology,Surgical Oncology
Bihar	Trust	Jamui	CHC	Public	General Medicine,Emergency Room Packages,Obstetrics & Gynaecology	-NA-
Bihar	Trust	Darbhanga	PHC	Public	Oral and Maxillofacial Surgery,General Medicine,Emergency Room Packages	-NA-
Bihar	Trust	Madhepura	PHC	Public	General Medicine,Emergency Room Packages,Oral and Maxillofacial Surgery	-NA-
Bihar	Trust	Madhubani	PHC	Public	General Surgery	-NA-
Bihar	Trust	Kishanganj	PHC	Public	Oral and Maxillofacial Surgery,General Surgery,General Medicine,Emergency Room Packages	-NA-
Bihar	Trust	Katihar	PHC	Public	General Medicine,Emergency Room Packages,General Surgery	-NA-
Bihar	Trust	Sheikhpura	PHC	Public	General Medicine,Emergency Room Packages,Oral and Maxillofacial Surgery,General Surgery	-NA-
Bihar	Trust	Katihar	PHC	Public	General Surgery	-NA-
Bihar	Trust	Katihar	PHC	Public	Obstetrics & Gynaecology,Oral and Maxillofacial Surgery,General Medicine,Emergency Room Packages	-NA-
Bihar	Trust	Katihar	PHC	Public	General Surgery,General Medicine,Emergency Room Packages	-NA-
Bihar	Trust	Purnia	CHC	Public	General Medicine,Emergency Room Packages	-NA-
Bihar	Trust	Katihar	PHC	Public	General Medicine,Emergency Room Packages,Oral and Maxillofacial Surgery,Polytrauma,Opthalmology	-NA-
Bihar	Trust	Katihar	PHC	Public	General Medicine,Emergency Room Packages,General Surgery	-NA-
Bihar	Trust	Purbi Champaran	SDH	Public	General Medicine,Emergency Room Packages,Oral and Maxillofacial Surgery,Obstetrics & Gynaecology,General Surgery	-NA-
Bihar	Trust	Katihar	PHC	Public	General Medicine,Emergency Room Packages,Oral and Maxillofacial Surgery,Obstetrics & Gynaecology	-NA-
Bihar	Trust	Muzaffarpur	PHC	Public	Paediatric medical management,General Medicine,Emergency Room Packages,Oral and Maxillofacial Surgery	-NA-
Bihar	Trust	Begusarai	CHC	Public	General Surgery	-NA-
Bihar	Trust	Muzaffarpur	PHC	Public	General Surgery	-NA-
Bihar	Trust	Siwan	SDH	Public	General Medicine,Emergency Room Packages,Obstetrics & Gynaecology,General Surgery	-NA-
Bihar	Trust	Madhubani	PHC	Public	General Medicine,Paediatric medical management,Emergency Room Packages,Obstetrics & Gynaecology	-NA-
Bihar	Trust	Begusarai	PHC	Public	General Medicine,Emergency Room Packages	-NA-
Bihar	Trust	Siwan	CHC	Public	Paediatric medical management	-NA-
Bihar	Trust	Siwan	PHC	Public	General Medicine,Emergency Room Packages	-NA-
Bihar	Trust	Madhepura	PHC	Public	General Medicine,Emergency Room Packages	-NA-
Bihar	Trust	Nawada	PHC	Public	General Surgery	-NA-
Bihar	Trust	Nawada	PHC	Public	General Surgery	-NA-
Bihar	Trust	Nawada	PHC	Public	General Surgery	-NA-
Bihar	Trust	Nawada	PHC	Public	Medical Oncology,General Surgery,General Medicine,Emergency Room Packages,Oral and Maxillofacial Surgery,Plastic & reconstructive,Burns management,Surgical Oncology,Obstetrics & Gynaecology	-NA-
Bihar	Trust	Jehanabad	PHC	Public	General Medicine,Emergency Room Packages	-NA-
Bihar	Trust	Jehanabad	PHC	Public	General Medicine,Emergency Room Packages	-NA-
Bihar	Trust	Jehanabad	PHC	Public	General Medicine,Emergency Room Packages	-NA-
Bihar	Trust	Jehanabad	PHC	Public	General Medicine,Emergency Room Packages	-NA-
Bihar	Trust	Pashchim Champaran	PHC	Public	General Medicine,Emergency Room Packages,Oral and Maxillofacial Surgery,General Surgery,Obstetrics & Gynaecology	-NA-
Bihar	Trust	Pashchim Champaran	CHC	Public	General Medicine,Emergency Room Packages,General Surgery	-NA-
Bihar	Trust	Siwan	PHC	Public	General Medicine,Emergency Room Packages,Oral and Maxillofacial Surgery,Obstetrics & Gynaecology,General Surgery	-NA-
Bihar	Trust	Pashchim Champaran	PHC	Public	General Medicine,Emergency Room Packages,Oral and Maxillofacial Surgery,Obstetrics & Gynaecology,General Surgery	-NA-
Bihar	Trust	Araria	CHC	Public	General Medicine,Emergency Room Packages	-NA-
Bihar	Trust	Madhepura	PHC	Public	General Medicine,Emergency Room Packages	-NA-
Bihar	Trust	Sitamarhi	PHC	Public	General Medicine,Emergency Room Packages	-NA-
Bihar	Trust	Sitamarhi	CHC	Public	General Medicine,Emergency Room Packages	-NA-
Bihar	Trust	Supaul	CHC	Public	Obstetrics & Gynaecology	-NA-
Bihar	Trust	Sitamarhi	CHC	Public	General Medicine,Emergency Room Packages	-NA-
Bihar	Trust	Sitamarhi	CHC	Public	General Medicine,Emergency Room Packages	-NA-
Bihar	Trust	Sitamarhi	CHC	Public	General Medicine,Emergency Room Packages	-NA-
Bihar	Trust	Sitamarhi	CHC	Public	General Medicine,Emergency Room Packages	-NA-
Bihar	Trust	Patna	MC	Public	Mental Disorders Packages,General Medicine,Paediatric medical management,Neurosurgery,Cardiology,Emergency Room Packages,Oral and Maxillofacial Surgery,Plastic & reconstructive,Burns management,Orthopaedics,Opthalmology,Otorhinolaryngology,General Surgery,Obstetrics & Gynaecology,Neo-natal,Medical Oncology,Radiation Oncology,Polytrauma,Paediatric cancer,General Medicine,Urology
Bihar	Trust	Pashchim Champaran	PHC	Public	General Medicine,Emergency Room Packages,Obstetrics & Gynaecology,General Surgery	-NA-
Bihar	Trust	Pashchim Champaran	SDH	Public	General Medicine,Emergency Room Packages,Oral and Maxillofacial Surgery,Obstetrics & Gynaecology,General Surgery	-NA-
Bihar	Trust	Pashchim Champaran	SDH	Public	General Medicine,Emergency Room Packages,Obstetrics & Gynaecology,General Surgery,Oral and Maxillofacial Surgery	-NA-
Bihar	Trust	Pashchim Champaran	PHC	Public	General Medicine,Emergency Room Packages,Oral and Maxillofacial Surgery,Obstetrics & Gynaecology,General Surgery	-NA-
Bihar	Trust	Madhubani	PHC	Public	General Medicine,Paediatric medical management,Neurosurgery,Neo-natal,Emergency Room Packages,Oral and Maxillofacial Surgery	-NA-
Bihar	Trust	Bhojpur	PHC	Public	General Medicine,Emergency Room Packages	-NA-
Bihar	Trust	Bhojpur	CHC	Public	-NA-	-NA-
Bihar	Trust	Bhojpur	CHC	Public	General Medicine,Emergency Room Packages,Oral and Maxillofacial Surgery	-NA-
Bihar	Trust	Bhojpur	PHC	Public	-NA-	-NA-
Bihar	Trust	Bhojpur	PHC	Public	-NA-	-NA-
Bihar	Trust	Sitamarhi	CHC	Public	General Medicine,Emergency Room Packages,General Surgery	-NA-
Bihar	Trust	Bhojpur	CHC	Public	-NA-	-NA-
Bihar	Trust	Bhojpur	CHC	Public	Oral and Maxillofacial Surgery	-NA-
Bihar	Trust	Bhojpur	CHC	Public	-NA-	-NA-
Bihar	Trust	Bhojpur	CHC	Public	-NA-	-NA-
Bihar	Trust	Sitamarhi	PHC	Public	General Medicine,Emergency Room Packages	-NA-
Bihar	Trust	Buxar	PHC	Public	General Medicine,Emergency Room Packages,General Surgery	-NA-
Bihar	Trust	Kaimur (Bhabua)	PHC	Public	General Surgery	-NA-
Bihar	Trust	Pashchim Champaran	PHC	Public	General Medicine,Emergency Room Packages,Oral and Maxillofacial Surgery,Obstetrics & Gynaecology,General Surgery	-NA-
Bihar	Trust	Sitamarhi	CHC	Public	General Medicine,Emergency Room Packages	-NA-
Bihar	Trust	Sitamarhi	CHC	Public	General Medicine,Emergency Room Packages	-NA-
Bihar	Trust	Pashchim Champaran	PHC	Public	General Medicine,Emergency Room Packages,General Surgery	-NA-
Bihar	Trust	Sitamarhi	SDH	Public	General Medicine,Emergency Room Packages	-NA-
Bihar	Trust	Pashchim Champaran	PHC	Public	General Medicine,Emergency Room Packages	-NA-
Bihar	Trust	Pashchim Champaran	PHC	Public	Oral and Maxillofacial Surgery	-NA-
Bihar	Trust	Sitamarhi	CHC	Public	General Medicine,Emergency Room Packages	-NA-
Bihar	Trust	Madhubani	PHC	Public	General Medicine,Emergency Room Packages,Oral and Maxillofacial Surgery	-NA-
Bihar	Trust	Madhubani	PHC	Public	General Surgery	-NA-
Bihar	Trust	Madhubani	PHC	Public	Oral and Maxillofacial Surgery	-NA-
Bihar	Trust	Pashchim Champaran	PHC	Public	General Medicine,Emergency Room Packages,General Surgery	-NA-
Bihar	Trust	Pashchim Champaran	PHC	Public	General Medicine,Emergency Room Packages	-NA-
Bihar	Trust	Pashchim Champaran	PHC	Public	General Medicine,Emergency Room Packages,Oral and Maxillofacial Surgery,General Surgery,Obstetrics & Gynaecology	-NA-
Bihar	Trust	Purnia	CHC	Public	General Medicine,Emergency Room Packages	-NA-
Bihar	Trust	Muzaffarpur	CHC	Public	General Medicine,Emergency Room Packages
Bihar	Trust	Purbi Champaran	CHC	Public	General Medicine,Emergency Room Packages	-NA-
Bihar	Trust	Purbi Champaran	PHC	Public	General Surgery	-NA-
Bihar	Trust	Muzaffarpur	CHC	Public	Obstetrics & Gynaecology	-NA-
Bihar	Trust	Arwal	PHC	Public	General Surgery	-NA-
Bihar	Trust	Madhepura	PHC	Public	Paediatric medical management	-NA-
Bihar	Trust	Madhepura	PHC	Public	General Medicine,Emergency Room Packages,Obstetrics & Gynaecology	-NA-
Bihar	Trust	Madhubani	PHC	Public	General Surgery	-NA-
Bihar	Trust	Madhepura	PHC	Public	General Medicine,Emergency Room Packages	-NA-
Bihar	Trust	Araria	PHC	Public	General Medicine,Emergency Room Packages	-NA-
Bihar	Trust	Khagaria	PHC	Public	General Medicine,Emergency Room Packages	-NA-
Bihar	Trust	Khagaria	PHC	Public	General Surgery	-NA-
Bihar	Trust	Khagaria	PHC	Public	General Medicine,Emergency Room Packages	-NA-
Bihar	Trust	Araria	PHC	Public	General Surgery	-NA-
Bihar	Trust	Araria	PHC	Public	General Medicine,Emergency Room Packages	-NA-
Bihar	Trust	Saharsa	PHC	Public	General Medicine,Emergency Room Packages	-NA-
Bihar	Trust	Madhepura	PHC	Public	General Medicine,Paediatric medical management,Neurosurgery,Cardiology,Neo-natal,Emergency Room Packages,Paediatric cancer,Oral and Maxillofacial Surgery,Polytrauma,Plastic & reconstructive,Burns management,Radiation Oncology,Medical Oncology,Surgical Oncology,Interventional Neuroradiology,Urology,Paediatric surgery,Cardio-thoracic & Vascular surgery,Orthopaedics,Obstetrics & Gynaecology,Opthalmo…	-NA-
Bihar	Trust	Arwal	CHC	Public	General Medicine,Emergency Room Packages	-NA-
Bihar	Trust	Saharsa	PHC	Public	General Surgery	-NA-
Bihar	Trust	Saharsa	PHC	Public	General Medicine,Emergency Room Packages	-NA-
Bihar	Trust	Saharsa	PHC	Public	General Medicine,Emergency Room Packages,Oral and Maxillofacial Surgery,General Surgery	-NA-
Bihar	Trust	Saharsa	PHC	Public	General Medicine,Emergency Room Packages,General Surgery,Obstetrics & Gynaecology,General Medicine,Emergency Room Packages
Bihar	Trust	Saharsa	SDH	Public	Paediatric medical management,General Medicine,Emergency Room Packages,Obstetrics & Gynaecology,General Surgery	-NA-
Bihar	Trust	Arwal	PHC	Public	General Medicine,Emergency Room Packages	-NA-
Bihar	Trust	Sitamarhi	PHC	Public	General Medicine,Emergency Room Packages	-NA-
Bihar	Trust	Madhepura	PHC	Public	General Medicine,Emergency Room Packages	-NA-
Bihar	Trust	Saharsa	PHC	Public	Orthopaedics	-NA-
Bihar	Trust	Saharsa	PHC	Public	General Medicine,Emergency Room Packages	-NA-
Bihar	Trust	Nalanda		Private (For Profit)	General Surgery,Obstetrics & Gynaecology,General Medicine,Emergency Room Packages	-NA-
Bihar	Trust	Nalanda		Private (For Profit)	Paediatric medical management,General Medicine,Emergency Room Packages,Obstetrics & Gynaecology,General Surgery	-NA-
Bihar	Trust	Nalanda		Private (For Profit)	Opthalmology	-NA-
Bihar	Trust	Bhojpur		Private (For Profit)	Oral and Maxillofacial Surgery	NA
Bihar	Trust	Bhojpur		Private (For Profit)	Obstetrics & Gynaecology,Opthalmology	NA
Bihar	Trust	Bhojpur		Private (For Profit)	Opthalmology	NA
Bihar	Trust	Madhepura	PHC	Public	General Medicine,Emergency Room Packages,General Surgery,General Medicine,Emergency Room Packages,Obstetrics & Gynaecology,Neo-natal
Bihar	Trust	Jamui	CHC	Public	General Medicine,Emergency Room Packages,Obstetrics & Gynaecology
Bihar	Trust	Jamui	PHC	Public	General Medicine,Emergency Room Packages	-NA-
Bihar	Trust	Jamui	CHC	Public	General Medicine,Emergency Room Packages,Orthopaedics,Obstetrics & Gynaecology,General Surgery	-NA-
Bihar	Trust	Kaimur (Bhabua)	PHC	Public	General Medicine,Emergency Room Packages,General Surgery,Obstetrics & Gynaecology	-NA-
Bihar	Trust	Kaimur (Bhabua)	PHC	Public	General Medicine,Emergency Room Packages,General Surgery	-NA-
Bihar	Trust	Nawada	PHC	Public	General Surgery,General Surgery,Obstetrics & Gynaecology,Oral and Maxillofacial Surgery,General Medicine,Emergency Room Packages,Paediatric medical management
Bihar	Trust	Patna		Private (For Profit)	Opthalmology	NA
Bihar	Trust	Patna		Private (For Profit)	Cardiology,Cardio-thoracic & Vascular surgery	NA
Bihar	Trust	Patna		Private (Not for Profit)	General Medicine,Emergency Room Packages,Orthopaedics,Obstetrics & Gynaecology,General Surgery,Otorhinolaryngology,Urology,General Medicine,Plastic & reconstructive,Burns management,Oral and Maxillofacial Surgery,Paediatric medical management,Opthalmology
Bihar	Trust	Begusarai		Private (For Profit)	Oral and Maxillofacial Surgery,General Medicine,Emergency Room Packages,Obstetrics & Gynaecology,Orthopaedics,General Surgery,Otorhinolaryngology,Urology,General Medicine,Plastic & reconstructive,Burns management,Oral and Maxillofacial Surgery,Paediatric medical management,Opthalmology
Bihar	Trust	Darbhanga		Private (For Profit)	Opthalmology,Otorhinolaryngology,Otorhinolaryngology,Urology,General Medicine,Plastic & reconstructive,Burns management,Oral and Maxillofacial Surgery,Paediatric medical management,Opthalmology
Bihar	Trust	Darbhanga		Private (For Profit)	General Medicine,Emergency Room Packages,Orthopaedics,Obstetrics & Gynaecology,General Surgery	-NA-
Bihar	Trust	Darbhanga		Private (For Profit)	General Surgery,Obstetrics & Gynaecology,Paediatric medical management	-NA-
Bihar	Trust	Darbhanga		Private (For Profit)	Orthopaedics,General Surgery	-NA-
Bihar	Trust	Darbhanga		Private (For Profit)	Obstetrics & Gynaecology,Otorhinolaryngology	-NA-
Bihar	Trust	Begusarai		Private (For Profit)	General Medicine,Emergency Room Packages,Obstetrics & Gynaecology	-NA-
Bihar	Trust	Begusarai		Private (For Profit)	Obstetrics & Gynaecology,General Surgery,Orthopaedics	NA
Bihar	Trust	Begusarai		Private (Not for Profit)	Obstetrics & Gynaecology,General Surgery	NA
Bihar	Trust	Rohtas		Private (Not for Profit)	General Surgery,Otorhinolaryngology,Opthalmology,Obstetrics & Gynaecology,Plastic & reconstructive,Burns management,Orthopaedics,Urology,Neurosurgery,Interventional Neuroradiology,Oral and Maxillofacial Surgery,General Medicine,Emergency Room Packages,Paediatric medical management,Neo-natal,Cardiology	-NA-
Bihar	Trust	Purnia		Private (For Profit)	Opthalmology	-NA-
Bihar	Trust	Purnia		Private (For Profit)	Oral and Maxillofacial Surgery	-NA-
Bihar	Trust	Purnia		Private (For Profit)	Obstetrics & Gynaecology,General Surgery	-NA-
Bihar	Trust	Purnia		Private (For Profit)	Otorhinolaryngology,General Surgery,Orthopaedics	-NA-
Bihar	Trust	Purnia		Private (For Profit)	Orthopaedics,General Surgery	-NA-
Bihar	Trust	Purnia		Private (Not for Profit)	Obstetrics & Gynaecology,General Surgery	-NA-
Bihar	Trust	Muzaffarpur		Private (For Profit)	General Medicine,Emergency Room Packages,Obstetrics & Gynaecology,General Surgery,Otorhinolaryngology,Opthalmology,Orthopaedics,Urology,Polytrauma,Paediatric medical management,Neo-natal
Bihar	Trust	Muzaffarpur		Private (For Profit)	General Surgery,Obstetrics & Gynaecology,Paediatric medical management	NA
Bihar	Trust	Patna		Private (For Profit)	Opthalmology	NA
Bihar	Trust	Muzaffarpur		Private (Not for Profit)	Obstetrics & Gynaecology,Orthopaedics,Neurosurgery,Interventional Neuroradiology,Oral and Maxillofacial Surgery,General Medicine,Emergency Room Packages,Paediatric medical management,Neo-natal,Cardiology,Urology,Opthalmology,Otorhinolaryngology,General Surgery	NA
Bihar	Trust	Patna	SH	Public	Orthopaedics,Neurosurgery,Interventional Neuroradiology,General Medicine,Emergency Room Packages
Bihar	Trust	Darbhanga	CHC	Public	General Medicine,Emergency Room Packages,Oral and Maxillofacial Surgery,General Surgery,General Surgery,Obstetrics & Gynaecology,General Medicine,Emergency Room Packages
Bihar	Trust	Sheikhpura	PHC	Public	General Medicine,Emergency Room Packages	-NA-
Bihar	Trust	Sheikhpura	PHC	Public	General Medicine,Emergency Room Packages,General Surgery,Obstetrics & Gynaecology	-NA-
Bihar	Trust	Purnia		Private (For Profit)	General Surgery,Obstetrics & Gynaecology	-NA-
Bihar	Trust	Purnia		Private (For Profit)	Obstetrics & Gynaecology,General Surgery	-NA-
Bihar	Trust	Purnia		Private (For Profit)	General Medicine,Emergency Room Packages	-NA-
Bihar	Trust	Purnia		Private (For Profit)	Oral and Maxillofacial Surgery	NA
Bihar	Trust	Purnia		Private (For Profit)	Obstetrics & Gynaecology,General Surgery	NA
Bihar	Trust	Kishanganj		Private (Not for Profit)	Otorhinolaryngology,General Surgery,Paediatric medical management,General Medicine,Emergency Room Packages,Oral and Maxillofacial Surgery,Orthopaedics,Obstetrics & Gynaecology,Opthalmology,Paediatric surgery
Bihar	Trust	Begusarai		Private (For Profit)	Paediatric medical management,Obstetrics & Gynaecology,Paediatric surgery
Bihar	Trust	Begusarai		Private (For Profit)	Orthopaedics,Paediatric surgery
Bihar	Trust	Gopalganj		Private (For Profit)	Opthalmology,Paediatric surgery
Bihar	Trust	Gopalganj		Private (For Profit)	Oral and Maxillofacial Surgery,Paediatric surgery
Bihar	Trust	Gopalganj		Private (Not for Profit)	Opthalmology,Paediatric surgery
Bihar	Trust	Gopalganj		Private (For Profit)	Opthalmology,Paediatric surgery
Bihar	Trust	Gopalganj		Private (For Profit)	Opthalmology,Paediatric surgery
Bihar	Trust	Gopalganj		Private (For Profit)	Opthalmology	NA
Bihar	Trust	Araria		Private (For Profit)	Opthalmology	-NA-
Bihar	Trust	Araria		Private (For Profit)	Opthalmology	-NA-
Bihar	Trust	Sitamarhi		Private (For Profit)	Paediatric medical management,General Medicine,Emergency Room Packages,Obstetrics & Gynaecology,Orthopaedics,General Surgery	-NA-
Bihar	Trust	Sitamarhi		Private (For Profit)	Cardiology,General Medicine,Urology,Neo-natal,Paediatric medical management,Emergency Room Packages,Oral and Maxillofacial Surgery,Polytrauma,Surgical Oncology,Plastic & reconstructive,Burns management,Medical Oncology,Neurosurgery,Interventional Neuroradiology,Paediatric surgery,Orthopaedics,Obstetrics & Gynaecology,Otorhinolaryngology,General Surgery	-NA-
Bihar	Trust	Saran		Private (Not for Profit)	Opthalmology	-NA-
Bihar	Trust	Saran		Private (For Profit)	Opthalmology,Oral and Maxillofacial Surgery	-NA-
Bihar	Trust	Begusarai	PHC	Public	General Surgery,General Surgery,Obstetrics & Gynaecology,Orthopaedics,General Medicine,Emergency Room Packages
Bihar	Trust	Saharsa	PHC	Public	General Medicine,Emergency Room Packages,General Surgery,Opthalmology,Obstetrics & Gynaecology,Orthopaedics,General Medicine,Emergency Room Packages,Oral and Maxillofacial Surgery,Paediatric medical management,Urology
Bihar	Trust	Vaishali	CHC	Public	General Medicine,Emergency Room Packages,General Surgery,General Surgery,Obstetrics & Gynaecology,General Medicine,Emergency Room Packages
Bihar	Trust	Araria	PHC	Public	General Surgery,Obstetrics & Gynaecology
Bihar	Trust	Patna	PHC	Public	-NA-	-NA-
Bihar	Trust	Samastipur	PHC	Public	General Medicine,Emergency Room Packages,Oral and Maxillofacial Surgery,General Surgery,Obstetrics & Gynaecology,General Surgery,Oral and Maxillofacial Surgery,General Medicine,Emergency Room Packages,Paediatric medical management
Bihar	Trust	Rohtas	PHC	Public	General Medicine,Emergency Room Packages,Obstetrics & Gynaecology,General Surgery
Bihar	Trust	Rohtas	PHC	Public	General Medicine,Emergency Room Packages,General Surgery,Obstetrics & Gynaecology
Bihar	Trust	Patna	PHC	Public	Obstetrics & Gynaecology,General Surgery,General Medicine,Emergency Room Packages
Bihar	Trust	Patna	PHC	Public	-NA-	-NA-
Bihar	Trust	Patna	PHC	Public	General Surgery,Oral and Maxillofacial Surgery,General Medicine,Emergency Room Packages,General Surgery,Obstetrics & Gynaecology
Bihar	Trust	Patna	PHC	Public	General Medicine,Emergency Room Packages,Oral and Maxillofacial Surgery,General Medicine,Emergency Room Packages,Obstetrics & Gynaecology
Bihar	Trust	Patna	PHC	Public	General Medicine,Emergency Room Packages
Bihar	Trust	Patna	PHC	Public	General Medicine,Emergency Room Packages,General Surgery,Obstetrics & Gynaecology,General Medicine,Emergency Room Packages
Bihar	Trust	Patna	PHC	Public	Otorhinolaryngology, General Surgery,Otorhinolaryngology,Obstetrics & Gynaecology,General Medicine,Emergency Room Packages
Bihar	Trust	Patna	PHC	Public	-NA-	-NA-
Bihar	Trust	Patna	PHC	Public	General Medicine,Emergency Room Packages,General Surgery, Obstetrics & Gynaecology,General Surgery
Bihar	Trust	Patna	PHC	Public	Paediatric medical management,General Medicine,Emergency Room Packages,Radiation Oncology,General Surgery, General Surgery,Obstetrics & Gynaecology,General Medicine,Emergency Room Packages
Bihar	Trust	Supaul	PHC	Public	Obstetrics & Gynaecology	-NA-
Bihar	Trust	Patna	PHC	Public	General Medicine,Emergency Room Packages	-NA-
Bihar	Trust	Patna	PHC	Public	Opthalmology,General Medicine,Paediatric medical management,Emergency Room Packages,Polytrauma,Obstetrics & Gynaecology	-NA-
Bihar	Trust	Madhepura	PHC	Public	General Surgery,General Surgery,Obstetrics & Gynaecology,Oral and Maxillofacial Surgery,General Medicine,Emergency Room Packages,Paediatric medical management,Orthopaedics
Bihar	Trust	Rohtas	CHC	Public	General Medicine,Emergency Room Packages,General Surgery,Obstetrics & Gynaecology
Bihar	Trust	Samastipur	PHC	Public	General Medicine,Emergency Room Packages,General Surgery,General Surgery,Obstetrics & Gynaecology,Oral and Maxillofacial Surgery,General Medicine,Emergency Room Packages,Paediatric medical management
Bihar	Trust	Patna	PHC	Public	Obstetrics & Gynaecology,General Surgery,General Medicine,Emergency Room Packages,Obstetrics & Gynaecology
Bihar	Trust	Rohtas	PHC	Public	General Medicine,Emergency Room Packages,General Surgery,Obstetrics & Gynaecology,General Medicine,Emergency Room Packages
Bihar	Trust	Samastipur	PHC	Public	General Medicine,Emergency Room Packages,General Surgery,Obstetrics & Gynaecology,General Medicine,Emergency Room Packages,Paediatric medical management
Bihar	Trust	Saharsa	PHC	Public	General Medicine,Paediatric medical management,Neurosurgery,General Surgery,Obstetrics & Gynaecology,General Medicine,Emergency Room Packages,Paediatric medical management
Bihar	Trust	Samastipur	PHC	Public	Oral and Maxillofacial Surgery,Obstetrics & Gynaecology,General Medicine,Emergency Room Packages,General Surgery	-NA-
Bihar	Trust	Samastipur	PHC	Public	General Medicine,Emergency Room Packages,Obstetrics & Gynaecology	-NA-
Bihar	Trust	Buxar	PHC	Public	-NA-	-NA-
Bihar	Trust	Saran	CHC	Public	General Surgery,Obstetrics & Gynaecology,General Medicine,Emergency Room Packages
Bihar	Trust	Saran	CHC	Public	General Surgery,Obstetrics & Gynaecology,General Medicine,Emergency Room Packages,General Surgery
Bihar	Trust	Bhojpur	CHC	Public	General Medicine,Emergency Room Packages,Oral and Maxillofacial Surgery,Obstetrics & Gynaecology,General Surgery	-NA-
Bihar	Trust	Aurangabad		Private (For Profit)	General Surgery,Obstetrics & Gynaecology,Orthopaedics,Urology,General Medicine,Emergency Room Packages	-NA-
Bihar	Trust	Aurangabad		Private (Not for Profit)	General Medicine,Emergency Room Packages,Plastic & reconstructive,Burns management,Urology,Orthopaedics,Obstetrics & Gynaecology,General Surgery	-NA-
Bihar	Trust	Aurangabad		Private (For Profit)	Obstetrics & Gynaecology,General Surgery	-NA-
Bihar	Trust	Aurangabad		Private (For Profit)	Oral and Maxillofacial Surgery,General Surgery,General Medicine,Emergency Room Packages,Obstetrics & Gynaecology	-NA-
Bihar	Trust	Aurangabad		Private (For Profit)	Obstetrics & Gynaecology,General Surgery	-NA-
Bihar	Trust	Sitamarhi		Private (For Profit)	Paediatric medical management,General Medicine,Emergency Room Packages,Orthopaedics,Obstetrics & Gynaecology,General Surgery	-NA-
Bihar	Trust	Muzaffarpur		Private (For Profit)	General Surgery	-NA-
Bihar	Trust	Muzaffarpur		Private (For Profit)	Obstetrics & Gynaecology,General Surgery	-NA-
Bihar	Trust	Muzaffarpur		Private (Not for Profit)	General Medicine,Emergency Room Packages,Orthopaedics,Obstetrics & Gynaecology,General Surgery	-NA-
Bihar	Trust	Muzaffarpur		Private (For Profit)	General Surgery,Obstetrics & Gynaecology	NA
Bihar	Trust	Muzaffarpur		Private (For Profit)	General Medicine,Emergency Room Packages,Obstetrics & Gynaecology,General Surgery	NA
Bihar	Trust	Muzaffarpur		Private (For Profit)	General Surgery	NA
Bihar	Trust	Bhojpur		Private (For Profit)	Urology,Obstetrics & Gynaecology,Surgical Oncology,General Surgery	NA
Bihar	Trust	Bhojpur		Private (For Profit)	Orthopaedics,Obstetrics & Gynaecology	NA
Bihar	Trust	Bhojpur		Private (For Profit)	Obstetrics & Gynaecology,General Surgery	NA
Bihar	Trust	Bhojpur		Private (For Profit)	Orthopaedics	NA
Bihar	Trust	Bhojpur		Private (For Profit)	General Medicine,Paediatric surgery,General Surgery	NA
Bihar	Trust	Madhubani		Private (For Profit)	Cardiology,General Medicine,Emergency Room Packages,Orthopaedics,Obstetrics & Gynaecology,General Surgery,Opthalmology,Neo-natal	NA
Bihar	Trust	Madhubani		Private (Not for Profit)	Neo-natal,Paediatric medical management,General Medicine,Emergency Room Packages,Oral and Maxillofacial Surgery,Paediatric surgery,Orthopaedics,Obstetrics & Gynaecology,Opthalmology,Otorhinolaryngology,General Surgery
Bihar	Trust	Siwan		Private (For Profit)	Orthopaedics	NA
Bihar	Trust	Siwan		Private (Not for Profit)	Opthalmology	NA
Bihar	Trust	Siwan		Private (For Profit)	Otorhinolaryngology	NA
Bihar	Trust	Siwan		Private (For Profit)	Orthopaedics,Obstetrics & Gynaecology,General Surgery,General Medicine,Emergency Room Packages	NA
Bihar	Trust	Siwan		Private (For Profit)	Opthalmology	NA
Bihar	Trust	Siwan		Private (For Profit)	Opthalmology	NA
Bihar	Trust	Gaya		Private (Not for Profit)	Urology,Polytrauma,Plastic & reconstructive,Burns management,Orthopaedics,Obstetrics & Gynaecology,General Surgery,General Medicine,Emergency Room Packages	-NA-
Bihar	Trust	Gaya		Private (For Profit)	General Surgery,Obstetrics & Gynaecology,Urology,General Medicine,Emergency Room Packages	-NA-
Bihar	Trust	Gaya		Private (For Profit)	Orthopaedics,General Surgery	-NA-
Bihar	Trust	Bhagalpur		Private (For Profit)	Urology,General Surgery,Opthalmology,Obstetrics & Gynaecology,Orthopaedics,General Medicine,Paediatric medical management,Neurosurgery,Oral and Maxillofacial Surgery,Interventional Neuroradiology,Plastic & reconstructive,Burns management,Polytrauma,Emergency Room Packages,Neo-natal,Surgical Oncology,Paediatric surgery	-NA-
Bihar	Trust	Patna		Private (For Profit)	Cardiology,Neo-natal,Paediatric medical management,General Medicine,Emergency Room Packages,Oral and Maxillofacial Surgery,Paediatric surgery,Orthopaedics,Obstetrics & Gynaecology,Opthalmology,General Surgery	NA
Bihar	Trust	Patna		Private (For Profit)	General Medicine,Emergency Room Packages,Paediatric medical management,Orthopaedics,General Surgery,Obstetrics & Gynaecology	NA
Bihar	Trust	Patna		Private (For Profit)	Paediatric surgery,Orthopaedics,Obstetrics & Gynaecology,General Surgery,Neurosurgery,Interventional Neuroradiology,Urology,General Medicine,Emergency Room Packages,Oral and Maxillofacial Surgery,Polytrauma,Surgical Oncology	NA
Bihar	Trust	Bhojpur	CHC	Public	General Medicine,Emergency Room Packages,Obstetrics & Gynaecology,General Surgery	-NA-
Bihar	Trust	Darbhanga	PHC	Public	Obstetrics & Gynaecology,General Medicine,Emergency Room Packages	-NA-
Bihar	Trust	Darbhanga	PHC	Public	General Medicine,Emergency Room Packages,Obstetrics & Gynaecology,General Surgery	-NA-
Bihar	Trust	Gaya	W&C	Public	Obstetrics & Gynaecology,General Surgery,General Medicine,Emergency Room Packages,Paediatric medical management,Neo-natal,Orthopaedics,Polytrauma
Bihar	Trust	Patna	CHC	Public	Obstetrics & Gynaecology,General Surgery,General Medicine,Emergency Room Packages,General Medicine,Emergency Room Packages,Paediatric medical management,Neo-natal,Orthopaedics,Polytrauma
Bihar	Trust	Patna	SH	Public	Obstetrics & Gynaecology,General Medicine,Emergency Room Packages,Urology,General Medicine,Emergency Room Packages,Paediatric medical management,Neo-natal,Orthopaedics,Polytrauma
Bihar	Trust	Aurangabad		Private (For Profit)	Obstetrics & Gynaecology,General Medicine,Emergency Room Packages,Paediatric medical management,Neo-natal,Orthopaedics,Polytrauma
Bihar	Trust	Darbhanga		Private (For Profit)	General Surgery,Obstetrics & Gynaecology,Orthopaedics	NA
Bihar	Trust	Darbhanga		Private (For Profit)	Paediatric medical management,General Medicine,Emergency Room Packages,Urology,Neo-natal,Obstetrics & Gynaecology,General Surgery	NA
Bihar	Trust	Darbhanga		Private (For Profit)	General Medicine,Paediatric medical management,Neurosurgery,Urology,Emergency Room Packages,Oral and Maxillofacial Surgery,Orthopaedics,Obstetrics & Gynaecology,Otorhinolaryngology,General Surgery	NA
Bihar	Trust	Darbhanga		Private (Not for Profit)	Oral and Maxillofacial Surgery,Medical Oncology,Paediatric cancer,Radiation Oncology,Surgical Oncology	NA
Bihar	Trust	Darbhanga		Private (For Profit)	Opthalmology,Oral and Maxillofacial Surgery,General Medicine,Emergency Room Packages	NA
Bihar	Trust	Darbhanga		Private (For Profit)	General Medicine,Urology,Cardiology,Emergency Room Packages,General Surgery	NA
Bihar	Trust	Darbhanga		Private (For Profit)	General Medicine,Urology,Emergency Room Packages,Orthopaedics,Obstetrics & Gynaecology,General Surgery	NA
Bihar	Trust	Darbhanga		Private (For Profit)	Paediatric medical management,General Medicine,Emergency Room Packages,Obstetrics & Gynaecology,General Surgery	NA
Bihar	Trust	Darbhanga		Private (For Profit)	Neo-natal,Obstetrics & Gynaecology,General Surgery,Paediatric medical management,General Medicine,Emergency Room Packages	NA
Bihar	Trust	Darbhanga		Private (Not for Profit)	General Medicine,Emergency Room Packages,Orthopaedics,Obstetrics & Gynaecology,General Surgery	NA
Bihar	Trust	Patna		Private (Not for Profit)	Opthalmology	NA
Bihar	Trust	Gaya		Private (For Profit)	General Surgery	NA
Bihar	Trust	Gaya		Private (For Profit)	General Medicine,Emergency Room Packages,General Surgery	NA
Bihar	Trust	Gaya		Private (Not for Profit)	General Medicine,Emergency Room Packages,Obstetrics & Gynaecology,General Surgery	NA
Bihar	Trust	Gaya		Private (For Profit)	Orthopaedics	NA
Bihar	Trust	Gaya		Private (For Profit)	Neo-natal,Paediatric medical management	NA
Bihar	Trust	Gaya		Private (For Profit)	General Surgery,General Medicine,Emergency Room Packages,Obstetrics & Gynaecology	NA
Bihar	Trust	Gaya		Private (For Profit)	General Surgery,Obstetrics & Gynaecology	NA
Bihar	Trust	Gaya		Private (For Profit)	General Surgery	NA
Bihar	Trust	Gaya		Private (Not for Profit)	General Surgery	NA
Bihar	Trust	Gaya		Private (For Profit)	General Medicine,Emergency Room Packages,Obstetrics & Gynaecology,General Surgery	NA
Bihar	Trust	Gaya		Private (For Profit)	General Surgery	NA
Bihar	Trust	Gaya		Private (For Profit)	Paediatric medical management,Obstetrics & Gynaecology,General Surgery	NA
Bihar	Trust	Gaya		Private (For Profit)	General Surgery,General Medicine,Emergency Room Packages	NA
Bihar	Trust	Patna		Private (For Profit)	General Medicine,Paediatric medical management,Neurosurgery,Urology,Emergency Room Packages,Interventional Neuroradiology,Orthopaedics,Obstetrics & Gynaecology,General Surgery	NA
Bihar	Trust	Patna		Private (For Profit)	Urology,General Surgery,Obstetrics & Gynaecology,Orthopaedics,Otorhinolaryngology,Opthalmology,Polytrauma,Oral and Maxillofacial Surgery	NA
Bihar	Trust	Patna		Private (For Profit)	General Surgery,Paediatric medical management,Obstetrics & Gynaecology	-NA-
Bihar	Trust	Patna		Private (For Profit)	General Medicine,Emergency Room Packages,Polytrauma,Orthopaedics,Obstetrics & Gynaecology,General Surgery	-NA-
Bihar	Trust	Nawada		Private (For Profit)	General Surgery,Orthopaedics,Oral and Maxillofacial Surgery	-NA-
Bihar	Trust	Patna		Private (For Profit)	General Medicine,Paediatric medical management,Neurosurgery	-NA-
Bihar	Trust	Rohtas		Private (For Profit)	Opthalmology	NA
Bihar	Trust	Rohtas		Private (Not for Profit)	General Surgery	NA
Bihar	Trust	Nawada		Private (For Profit)	Urology,General Surgery	NA
Bihar	Trust	Begusarai		Private (For Profit)	Paediatric medical management,General Medicine,Emergency Room Packages,Plastic & reconstructive,Burns management,Obstetrics & Gynaecology,General Surgery	NA
Bihar	Trust	Begusarai		Private (Not for Profit)	Orthopaedics	NA
Bihar	Trust	Begusarai		Private (For Profit)	General Surgery,Obstetrics & Gynaecology,Paediatric medical management	NA
Bihar	Trust	Begusarai		Private (For Profit)	Paediatric cancer,Neurosurgery,Interventional Neuroradiology,Obstetrics & Gynaecology,General Surgery	NA
Bihar	Trust	Begusarai		Private (For Profit)	Obstetrics & Gynaecology,Orthopaedics,General Surgery,Urology,Oral and Maxillofacial Surgery,General Medicine,Emergency Room Packages,Paediatric medical management	NA
Bihar	Trust	Begusarai		Private (For Profit)	Polytrauma,Plastic & reconstructive,Burns management,Urology,Paediatric surgery,Obstetrics & Gynaecology,General Surgery,General Medicine,Emergency Room Packages,Paediatric medical management,Neo-natal	NA
Bihar	Trust	Begusarai		Private (For Profit)	General Surgery	NA
Bihar	Trust	Begusarai		Private (For Profit)	Opthalmology,Obstetrics & Gynaecology,Orthopaedics,Urology,Neurosurgery,Interventional Neuroradiology,Plastic & reconstructive,Burns management,General Medicine,Emergency Room Packages,Paediatric medical management,Neo-natal,Otorhinolaryngology,Oral and Maxillofacial Surgery,General Surgery,Polytrauma	NA
Bihar	Trust	Madhubani		Private (For Profit)	General Surgery	NA
Bihar	Trust	Saran		Private (Not for Profit)	Urology,Orthopaedics,Obstetrics & Gynaecology,Opthalmology,General Medicine,Emergency Room Packages,Oral and Maxillofacial Surgery,Otorhinolaryngology,General Surgery	NA
Bihar	Trust	Rohtas		Private (For Profit)	General Medicine,Emergency Room Packages,Oral and Maxillofacial Surgery,Orthopaedics,Opthalmology,General Surgery	NA
Bihar	Trust	Rohtas		Private (Not for Profit)	Obstetrics & Gynaecology,General Surgery,General Medicine,Emergency Room Packages	NA
Bihar	Trust	Katihar		Private (For Profit)	Opthalmology	NA
Bihar	Trust	Katihar		Private (Not for Profit)	Opthalmology	NA
Bihar	Trust	Katihar		Private (For Profit)	General Surgery,Obstetrics & Gynaecology	NA
Bihar	Trust	Katihar		Private (For Profit)	General Medicine,Urology,Paediatric medical management,Emergency Room Packages,Paediatric surgery,Orthopaedics,Obstetrics & Gynaecology,General Surgery,Neo-natal	NA
Bihar	Trust	Katihar		Private (Not for Profit)	General Medicine,Paediatric medical management,Emergency Room Packages,Oral and Maxillofacial Surgery,Orthopaedics,Obstetrics & Gynaecology,Opthalmology,Otorhinolaryngology,General Surgery
Bihar	Trust	Gaya		Private (For Profit)	General Surgery,Obstetrics & Gynaecology,Orthopaedics,General Medicine,Emergency Room Packages	NA
Bihar	Trust	Jamui		Private (Not for Profit)	General Surgery	NA
Bihar	Trust	Jamui		Private (For Profit)	General Medicine,Emergency Room Packages,Oral and Maxillofacial Surgery,Opthalmology	NA
Bihar	Trust	Jamui		Private (For Profit)	General Surgery,Obstetrics & Gynaecology,Orthopaedics	NA
Bihar	Trust	Araria		Private (Not for Profit)	Oral and Maxillofacial Surgery,Opthalmology,General Surgery,General Medicine,Emergency Room Packages	NA
Bihar	Trust	Aurangabad		Private (Not for Profit)	Opthalmology	NA
Bihar	Trust	Bhagalpur		Private (Not for Profit)	Obstetrics & Gynaecology,General Surgery	NA
Bihar	Trust	Bhagalpur		Private (For Profit)	Urology	NA
Bihar	Trust	Gaya		Private (For Profit)	General Medicine,Emergency Room Packages,Oral and Maxillofacial Surgery	NA
Bihar	Trust	Samastipur		Private (For Profit)	Oral and Maxillofacial Surgery,Obstetrics & Gynaecology,Opthalmology,General Surgery,General Medicine,Emergency Room Packages,Orthopaedics	NA
Bihar	Trust	Samastipur		Private (Not for Profit)	Opthalmology	NA
Bihar	Trust	Samastipur		Private (For Profit)	Paediatric medical management	NA
Bihar	Trust	Nalanda		Private (For Profit)	General Medicine,Emergency Room Packages,General Surgery,Oral and Maxillofacial Surgery	NA
Bihar	Trust	Nalanda		Private (For Profit)	Neo-natal,Paediatric medical management,General Medicine,Emergency Room Packages,Oral and Maxillofacial Surgery,Obstetrics & Gynaecology,General Surgery	NA
Bihar	Trust	Nalanda		Private (For Profit)	Opthalmology	NA
Bihar	Trust	Nalanda		Private (For Profit)	General Medicine,Emergency Room Packages,Oral and Maxillofacial Surgery,Neurosurgery,Interventional Neuroradiology,Orthopaedics	NA
Bihar	Trust	Aurangabad		Private (For Profit)	Opthalmology	NA
Bihar	Trust	Aurangabad		Private (For Profit)	General Medicine,Emergency Room Packages,General Surgery	NA
Bihar	Trust	Bhojpur		Private (For Profit)	Obstetrics & Gynaecology,General Surgery	NA
Bihar	Trust	Khagaria		Private (Not for Profit)	General Medicine,Cardiology,Neo-natal,Paediatric medical management,Emergency Room Packages,Oral and Maxillofacial Surgery,Polytrauma,Obstetrics & Gynaecology,Opthalmology,Otorhinolaryngology,Plastic & reconstructive,Burns management,Medical Oncology,Orthopaedics,General Surgery	NA
Bihar	Trust	Vaishali		Private (For Profit)	Urology,Obstetrics & Gynaecology,General Surgery	NA
Bihar	Trust	Vaishali		Private (For Profit)	General Surgery	-NA-
Bihar	Trust	Patna		Private (For Profit)	General Surgery	-NA-
Bihar	Trust	Patna		Private (For Profit)	General Medicine,Emergency Room Packages,General Surgery	-NA-
Bihar	Trust	Patna		Private (For Profit)	General Surgery	-NA-
Bihar	Trust	Patna		Private (For Profit)	Orthopaedics	-NA-
Bihar	Trust	Patna		Private (For Profit)	General Surgery	-NA-
Bihar	Trust	Patna		Private (For Profit)	General Medicine,Emergency Room Packages,Obstetrics & Gynaecology,General Surgery,Orthopaedics,Urology	-NA-
Bihar	Trust	Patna		Private (For Profit)	General Surgery	-NA-
Bihar	Trust	Patna		Private (For Profit)	Orthopaedics,Cardio-thoracic & Vascular surgery,Neurosurgery,Interventional Neuroradiology,Plastic & reconstructive,Burns management,General Medicine,Emergency Room Packages,Paediatric medical management,Cardiology,Urology,Paediatric surgery,Otorhinolaryngology,Obstetrics & Gynaecology,General Surgery,Polytrauma	-NA-
Bihar	Trust	Patna		Private (For Profit)	Oral and Maxillofacial Surgery,Paediatric surgery,General Surgery	NA
Bihar	Trust	Patna		Private (For Profit)	General Medicine,Emergency Room Packages,Oral and Maxillofacial Surgery,Polytrauma,Plastic & reconstructive,Burns management,Medical Oncology,Neurosurgery,Interventional Neuroradiology,Urology,Paediatric surgery,Cardio-thoracic & Vascular surgery,Orthopaedics,Obstetrics & Gynaecology,Opthalmology,Otorhinolaryngology,General Surgery,Paediatric medical management,Cardiology,Neo-natal	NA
Bihar	Trust	Patna		Private (For Profit)	Orthopaedics	NA
Bihar	Trust	Patna		Private (For Profit)	General Surgery,Obstetrics & Gynaecology,Oral and Maxillofacial Surgery,General Medicine,Emergency Room Packages	NA
Bihar	Trust	Darbhanga	PHC	Public	General Medicine,Emergency Room Packages,Obstetrics & Gynaecology,General Surgery	NA
Bihar	Trust	Darbhanga	PHC	Public	General Medicine,Emergency Room Packages,Obstetrics & Gynaecology,General Surgery	-NA-
Bihar	Trust	Darbhanga		Private (For Profit)	Orthopaedics,Obstetrics & Gynaecology	-NA-
Bihar	Trust	Banka	PHC	Public	Neo-natal,General Medicine,Emergency Room Packages,Orthopaedics,Obstetrics & Gynaecology,Opthalmology,Otorhinolaryngology,General Surgery,Paediatric medical management,Polytrauma	-NA-
Bihar	Trust	Bhojpur	PHC	Public	General Medicine,Emergency Room Packages,Oral and Maxillofacial Surgery	-NA-
Bihar	Trust	Muzaffarpur		Private (For Profit)	General Surgery	-NA-
Bihar	Trust	Muzaffarpur		Private (For Profit)	General Surgery	NA
Bihar	Trust	Muzaffarpur		Private (For Profit)	General Surgery	NA
Bihar	Trust	Muzaffarpur		Private (For Profit)	Orthopaedics,General Surgery	NA
Bihar	Trust	Muzaffarpur		Private (For Profit)	General Surgery,Obstetrics & Gynaecology	NA
Bihar	Trust	Muzaffarpur		Private (For Profit)	General Medicine,Emergency Room Packages,Orthopaedics,Obstetrics & Gynaecology,General Surgery	NA
Bihar	Trust	Muzaffarpur		Private (For Profit)	General Surgery	NA
Bihar	Trust	Muzaffarpur		Private (For Profit)	General Surgery	NA
Bihar	Trust	Muzaffarpur		Private (For Profit)	Opthalmology	NA
Bihar	Trust	Patna		Private (For Profit)	Obstetrics & Gynaecology,General Medicine,Urology	NA
Bihar	Trust	Patna		Private (For Profit)	General Surgery,Obstetrics & Gynaecology	NA
Bihar	Trust	Purbi Champaran		Private (For Profit)	General Surgery	NA
Bihar	Trust	Pashchim Champaran	MC	Public	Mental Disorders Packages,General Medicine,Paediatric medical management,Neurosurgery,Urology,Cardiology,Neo-natal,Emergency Room Packages,Paediatric cancer,Oral and Maxillofacial Surgery,Polytrauma,Plastic & reconstructive,Burns management,Radiation Oncology,Medical Oncology,Surgical Oncology,Interventional Neuroradiology,Paediatric surgery,Cardio-thoracic & Vascular surgery,Orthopaedics,Obstetr…	NA
Bihar	Trust	Patna		Private (For Profit)	General Surgery	NA
Bihar	Trust	Patna		Private (Not for Profit)	General Surgery,Orthopaedics,Polytrauma	NA
Bihar	Trust	Bhagalpur		Private (For Profit)	Opthalmology	NA
Bihar	Trust	Bhagalpur		Private (For Profit)	Orthopaedics,General Surgery	NA
Bihar	Trust	Bhagalpur		Private (For Profit)	Opthalmology	NA
Bihar	Trust	Patna		Private (For Profit)	Opthalmology	NA
Bihar	Trust	Begusarai		Private (For Profit)	Oral and Maxillofacial Surgery,Opthalmology	NA
Bihar	Trust	Saharsa		Private (For Profit)	Opthalmology	NA
Bihar	Trust	Patna		Private (For Profit)	Opthalmology	NA
Bihar	Trust	Patna		Private (For Profit)	Opthalmology	NA
Bihar	Trust	Patna		Private (For Profit)	Opthalmology	NA
Bihar	Trust	Patna		Private (For Profit)	General Medicine,Urology,General Surgery	NA
Bihar	Trust	Patna		Private (For Profit)	Opthalmology	NA
Bihar	Trust	Nalanda		Private (For Profit)	Opthalmology	NA
Bihar	Trust	Nalanda		Private (For Profit)	Opthalmology	NA
Bihar	Trust	Nalanda		Private (For Profit)	General Surgery	NA
Bihar	Trust	Nalanda		Private (For Profit)	Opthalmology	NA
Bihar	Trust	Nalanda		Private (For Profit)	Opthalmology	NA
Bihar	Trust	Muzaffarpur		Private (For Profit)	Neo-natal,Paediatric medical management	NA
Bihar	Trust	Muzaffarpur		Private (For Profit)	General Medicine,Emergency Room Packages,General Surgery	NA
Bihar	Trust	Muzaffarpur		Private (For Profit)	Obstetrics & Gynaecology	NA
Bihar	Trust	Muzaffarpur		Private (For Profit)	General Medicine,Emergency Room Packages,General Surgery	NA
Bihar	Trust	Muzaffarpur		Private (For Profit)	General Surgery	NA
Bihar	Trust	Muzaffarpur		Private (For Profit)	General Surgery	NA
Bihar	Trust	Patna		Private (For Profit)	Opthalmology	NA
Bihar	Trust	Saran		Private (For Profit)	Orthopaedics	NA
Bihar	Trust	Nalanda		Private (For Profit)	General Surgery	NA
Bihar	Trust	Samastipur		Private (Not for Profit)	Oral and Maxillofacial Surgery	NA
Bihar	Trust	Samastipur		Private (For Profit)	General Surgery	NA
Bihar	Trust	Samastipur		Private (For Profit)	General Surgery	NA
Bihar	Trust	Samastipur		Private (For Profit)	General Surgery	NA
Bihar	Trust	Samastipur		Private (For Profit)	General Surgery	NA
Bihar	Trust	Patna		Private (For Profit)	Cardiology	NA
Bihar	Trust	Patna		Private (For Profit)	Opthalmology	NA
Bihar	Trust	Patna		Private (For Profit)	General Medicine,Urology,Emergency Room Packages,Orthopaedics,Obstetrics & Gynaecology,General Surgery	NA
Bihar	Trust	Patna		Private (For Profit)	Neo-natal,Paediatric medical management,General Surgery,Obstetrics & Gynaecology	NA
Bihar	Trust	Patna		Private (For Profit)	General Surgery,Orthopaedics,General Medicine,Emergency Room Packages	NA
Bihar	Trust	Muzaffarpur		Private (Not for Profit)	Opthalmology	NA
Bihar	Trust	Patna		Private (For Profit)	General Medicine,Emergency Room Packages,Neurosurgery,Interventional Neuroradiology,Orthopaedics,Obstetrics & Gynaecology,General Surgery	NA
Bihar	Trust	Munger		Private (For Profit)	General Surgery	NA
Bihar	Trust	Bhojpur		Private (For Profit)	Orthopaedics	NA
Bihar	Trust	Aurangabad		Private (For Profit)	Opthalmology	NA
Bihar	Trust	Muzaffarpur		Private (For Profit)	General Surgery,Obstetrics & Gynaecology	NA
Bihar	Trust	Muzaffarpur		Private (For Profit)	Obstetrics & Gynaecology	NA
Bihar	Trust	Nalanda		Private (For Profit)	General Surgery	NA
Bihar	Trust	Nalanda		Private (For Profit)	Opthalmology	NA
Bihar	Trust	Nalanda		Private (For Profit)	Opthalmology	NA
Bihar	Trust	Pashchim Champaran		Private (For Profit)	Obstetrics & Gynaecology	NA
Bihar	Trust	Araria		Public	Orthopaedics	NA
Chandigarh	Trust	Chandigarh	SH	Public	Opthalmology,Obstetrics & Gynaecology,Orthopaedics,Oral and Maxillofacial Surgery,Paediatric medical management,Mental Disorders Packages,General Surgery,General Medicine,Neo-natal,Emergency Room Packages,Otorhinolaryngology	NA
Chandigarh	Trust	Chandigarh	SDH	Public	Mental Disorders Packages,General Medicine,Paediatric medical management,Emergency Room Packages,Orthopaedics,Obstetrics & Gynaecology,Opthalmology,Otorhinolaryngology,General Surgery	NA
Chandigarh	Trust	Chandigarh	CHC	Public	General Surgery,General Medicine,Emergency Room Packages,Paediatric medical management,Oral and Maxillofacial Surgery,Orthopaedics,Obstetrics & Gynaecology,Opthalmology	NA
Chandigarh	Trust	Chandigarh	CHC	Public	General Medicine,Paediatric medical management,Emergency Room Packages,Oral and Maxillofacial Surgery,Obstetrics & Gynaecology,Opthalmology,Otorhinolaryngology	NA
Chandigarh	Trust	Chandigarh	MC	Public	Mental Disorders Packages,General Medicine,Emergency Room Packages,Paediatric cancer,Polytrauma,Plastic & reconstructive,Burns management,Medical Oncology,Surgical Oncology,Urology,Cardio-thoracic & Vascular surgery,Paediatric medical management,Neurosurgery,Cardiology,Neo-natal,General Surgery,Otorhinolaryngology,Opthalmology,Obstetrics & Gynaecology,Orthopaedics,Interventional Neuroradiology,Ra…	NA
Chandigarh	Trust	Chandigarh		Private (For Profit)	Cardiology,General Medicine,Paediatric medical management,Neurosurgery,Emergency Room Packages,Cardio-thoracic & Vascular surgery,Interventional Neuroradiology,Urology,Polytrauma,Otorhinolaryngology,General Surgery,Orthopaedics	NA
Chandigarh	Trust	Chandigarh		Private (For Profit)	Orthopaedics,Obstetrics & Gynaecology,General Surgery,General Medicine,Emergency Room Packages,Oral and Maxillofacial Surgery,Medical Oncology,Surgical Oncology	-NA-
Chandigarh	Trust	Chandigarh		Private (For Profit)	General Medicine,Paediatric medical management,Neurosurgery,Urology,Cardiology,Emergency Room Packages,Cardio-thoracic & Vascular surgery,Orthopaedics	-NA-
Chandigarh	Trust	Chandigarh		Private (For Profit)	Orthopaedics,General Medicine,Emergency Room Packages,General Surgery,Obstetrics & Gynaecology,General Medicine,Urology,Neurosurgery,Interventional Neuroradiology,Plastic & reconstructive,Burns management,Polytrauma,Paediatric medical management
Chandigarh	Trust	Bathinda		Private (Not for Profit)	General Surgery,General Surgery,Obstetrics & Gynaecology,General Medicine,Urology,Neurosurgery,Interventional Neuroradiology,Plastic & reconstructive,Burns management,Polytrauma,Paediatric medical management
Chandigarh	Trust	Chandigarh		Private (For Profit)	Opthalmology	NA
Chandigarh	Trust	Chandigarh		Private (Not for Profit)	Orthopaedics,Otorhinolaryngology,General Surgery,General Medicine,Urology,Paediatric medical management,Emergency Room Packages,Polytrauma,Neurosurgery,Interventional Neuroradiology,Obstetrics & Gynaecology	NA
Chandigarh	Trust	Chandigarh		Private (For Profit)	General Medicine,Paediatric medical management,Neurosurgery,Urology,Cardiology,Cardio-thoracic & Vascular surgery,Orthopaedics,General Surgery	NA
Chandigarh	Trust	Chandigarh		Private (For Profit)	Opthalmology	NA
Chandigarh	Trust	Chandigarh		Private (For Profit)	General Medicine,Emergency Room Packages,Urology,General Surgery	NA
Chandigarh	Trust	Chandigarh		Private (For Profit)	Opthalmology	NA
Chandigarh	Trust	Chandigarh		Private (For Profit)	General Medicine,Emergency Room Packages,Polytrauma,Plastic & reconstructive,Burns management,Surgical Oncology,Urology,Paediatric surgery,Orthopaedics,Obstetrics & Gynaecology,General Surgery,Paediatric medical management,Neurosurgery	NA
Chandigarh	Trust	Chandigarh		Private (For Profit)	Orthopaedics	NA
Dadra and Nagar Haveli	Insurance	Dadra And Nagar Haveli	DH	Public	General Medicine,Urology,Neo-natal,Paediatric medical management,Emergency Room Packages,Polytrauma,Oral and Maxillofacial Surgery,Paediatric surgery,Orthopaedics,Obstetrics & Gynaecology,Opthalmology,Otorhinolaryngology,General Surgery,Neurosurgery,Interventional Neuroradiology,Mental Disorders Packages,Plastic & reconstructive,Burns management,Oral and Maxillofacial Surgery
Dadra and Nagar Haveli	Insurance	Dadra And Nagar Haveli	CHC	Public	Mental Disorders Packages,General Medicine,Emergency Room Packages
Dadra and Nagar Haveli	Insurance	Dadra And Nagar Haveli	SDH	Public	Paediatric medical management,General Medicine,Emergency Room Packages,Oral and Maxillofacial Surgery,Orthopaedics,Obstetrics & Gynaecology,Opthalmology,General Medicine,Emergency Room Packages
Dadra and Nagar Haveli	Insurance	Dadra And Nagar Haveli	CHC	Public	Oral and Maxillofacial Surgery,General Medicine,Emergency Room Packages,General Surgery
Daman and Diu	Insurance	Diu	DH	Public	General Medicine,Emergency Room Packages,Obstetrics & Gynaecology,General Surgery,Paediatric medical management,Opthalmology
Daman and Diu	Insurance	Daman	CHC	Public	Paediatric medical management,Paediatric medical management,General Medicine,Emergency Room Packages,Oral and Maxillofacial Surgery,Opthalmology
Daman and Diu	Insurance	Daman	DH	Public	General Surgery,Opthalmology,General Medicine,Emergency Room Packages,Obstetrics & Gynaecology,Orthopaedics,Paediatric medical management,Urology,Neurosurgery,Interventional Neuroradiology,Plastic & reconstructive,Burns management,Otorhinolaryngology,Neo-natal
Goa	Trust	North Goa	DH	Public	General Medicine,Urology,Cardiology,Neo-natal,Emergency Room Packages,Polytrauma,Plastic & reconstructive,Burns management,Surgical Oncology,Orthopaedics,Obstetrics & Gynaecology,Opthalmology,Otorhinolaryngology,General Surgery,General Surgery,Otorhinolaryngology,Opthalmology,Obstetrics & Gynaecology,Orthopaedics,Urology,Surgical Oncology,Medical Oncology,Plastic & reconstructive,Burns management…
Goa	Trust	South Goa	DH	Public	General Medicine,Urology,Cardiology,Emergency Room Packages,Polytrauma,Orthopaedics,Obstetrics & Gynaecology,Opthalmology,General Surgery,Otorhinolaryngology	-NA-
Goa	Trust	South Goa	DH	Public	General Medicine,Paediatric medical management,Emergency Room Packages,Oral and Maxillofacial Surgery,Orthopaedics,Obstetrics & Gynaecology,Opthalmology,Otorhinolaryngology,General Surgery	-NA-
Goa	Trust	North Goa	CHC	Public	General Medicine,Paediatric medical management,Emergency Room Packages,Paediatric surgery,Otorhinolaryngology	-NA-
Goa	Trust	South Goa	CHC	Public	General Medicine,Urology,Paediatric medical management,Emergency Room Packages,Plastic & reconstructive,Burns management,Medical Oncology,Orthopaedics,Otorhinolaryngology,General Surgery	-NA-
Goa	Trust	North Goa	CHC	Public	General Surgery,Obstetrics & Gynaecology,Orthopaedics,Paediatric surgery,General Medicine,Emergency Room Packages,Paediatric medical management,Urology,Mental Disorders Packages	-NA-
Goa	Trust	South Goa	CHC	Public	General Medicine,Neo-natal,Paediatric medical management,Emergency Room Packages	-NA-
Goa	Trust	South Goa	SDH	Public	General Medicine,Neo-natal,Paediatric medical management,Emergency Room Packages,Paediatric surgery,Obstetrics & Gynaecology	-NA-
Goa	Trust	South Goa		Private (For Profit)	General Medicine,Urology,General Surgery	-NA-
Goa	Trust	North Goa		Private (For Profit)	Surgical Oncology,Obstetrics & Gynaecology,General Surgery,General Medicine,Emergency Room Packages,Medical Oncology	-NA-
Goa	Trust	South Goa		Private (For Profit)	General Medicine,Paediatric medical management,Neurosurgery,Emergency Room Packages,Surgical Oncology,Orthopaedics,Obstetrics & Gynaecology,Opthalmology,General Surgery	NA
Goa	Trust	South Goa		Private (For Profit)	Orthopaedics	NA
Goa	Trust	North Goa		Private (For Profit)	Opthalmology	NA
Goa	Trust	South Goa		Private (For Profit)	Opthalmology	NA
Goa	Trust	South Goa		Private (For Profit)	Obstetrics & Gynaecology,Otorhinolaryngology,General Surgery	NA
Goa	Trust	South Goa		Private (For Profit)	Urology
Goa	Trust	South Goa		Private (For Profit)	General Medicine,Emergency Room Packages,Oral and Maxillofacial Surgery,Plastic & reconstructive,Burns management,Radiation Oncology,Medical Oncology,Surgical Oncology,Neurosurgery,Interventional Neuroradiology,Cardio-thoracic & Vascular surgery,Orthopaedics,Obstetrics & Gynaecology,Opthalmology,Otorhinolaryngology,General Surgery,Mental Disorders Packages,Urology,Cardiology,Paediatric medical ma…
Goa	Trust	South Goa		Private (For Profit)	Neo-natal,Paediatric medical management,Urology
Goa	Trust	South Goa		Private (For Profit)	General Medicine,Emergency Room Packages,Oral and Maxillofacial Surgery,Obstetrics & Gynaecology,General Surgery,Urology
Goa	Trust	Prakasam		Private (For Profit)	Neo-natal,Paediatric medical management,Obstetrics & Gynaecology,Otorhinolaryngology,General Surgery,Urology
Goa	Trust	North Goa	CHC	Public	General Medicine,Emergency Room Packages	NA
Goa	Trust	North Goa	CHC	Public	General Medicine,Emergency Room Packages	NA
Goa	Trust	South Goa		Private (For Profit)	General Medicine,Paediatric medical management,Neurosurgery,Urology,Cardiology,Emergency Room Packages,Polytrauma,Surgical Oncology,Cardio-thoracic & Vascular surgery,Orthopaedics,Obstetrics & Gynaecology,General Surgery	NA
Goa	Trust	North Goa	MC	Public	Mental Disorders Packages,General Medicine,Paediatric medical management,Neurosurgery,Urology,Cardiology,Neo-natal,Emergency Room Packages,Paediatric cancer,Oral and Maxillofacial Surgery,Polytrauma,Plastic & reconstructive,Burns management,Medical Oncology,Surgical Oncology,Interventional Neuroradiology,Paediatric surgery,General Surgery,Otorhinolaryngology,Opthalmology,Obstetrics & Gynaecology,…	-NA-
Gujarat	Hybrid	Patan	CHC	Public	General Surgery,Otorhinolaryngology,Opthalmology,Obstetrics & Gynaecology,Orthopaedics,Cardio-thoracic & Vascular surgery,Paediatric surgery,Urology,Neurosurgery,Interventional Neuroradiology,Surgical Oncology,Medical Oncology,Radiation Oncology,Plastic & reconstructive,Burns management,Polytrauma,Oral and Maxillofacial Surgery,Paediatric cancer,General Medicine,Emergency Room Packages,Paediatric…	NA
Gujarat	Hybrid	Patan	PHC	Public	General Surgery,Otorhinolaryngology,Opthalmology,Obstetrics & Gynaecology,Orthopaedics,Cardio-thoracic & Vascular surgery,Paediatric surgery,Urology,Neurosurgery,Interventional Neuroradiology,Surgical Oncology,Medical Oncology,Radiation Oncology,Plastic & reconstructive,Burns management,Polytrauma,Oral and Maxillofacial Surgery,Paediatric cancer,General Medicine,Emergency Room Packages,Paediatric…	NA
Gujarat	Hybrid	Patan	PHC	Public	General Surgery,Otorhinolaryngology,Opthalmology,Obstetrics & Gynaecology,Orthopaedics,Cardio-thoracic & Vascular surgery,Paediatric surgery,Urology,Neurosurgery,Interventional Neuroradiology,Surgical Oncology,Medical Oncology,Radiation Oncology,Plastic & reconstructive,Burns management,Polytrauma,Oral and Maxillofacial Surgery,Paediatric cancer,General Medicine,Emergency Room Packages,Paediatric…	NA
Gujarat	Hybrid	Patan	PHC	Public	General Surgery,Otorhinolaryngology,Opthalmology,Obstetrics & Gynaecology,Orthopaedics,Cardio-thoracic & Vascular surgery,Paediatric surgery,Urology,Neurosurgery,Interventional Neuroradiology,Surgical Oncology,Medical Oncology,Radiation Oncology,Plastic & reconstructive,Burns management,Polytrauma,Oral and Maxillofacial Surgery,Paediatric cancer,General Medicine,Emergency Room Packages,Paediatric…	NA
Gujarat	Hybrid	Patan	PHC	Public	Radiation Oncology,Plastic & reconstructive,Burns management,Polytrauma,Oral and Maxillofacial Surgery,Paediatric cancer,General Medicine,Emergency Room Packages,Paediatric medical management,Neo-natal,Cardiology,Urology,Neurosurgery,Mental Disorders Packages,General Surgery,Otorhinolaryngology,Opthalmology,Obstetrics & Gynaecology,Orthopaedics,Cardio-thoracic & Vascular surgery,Paediatric surger…	NA
Gujarat	Hybrid	Patan	PHC	Public	General Surgery,Otorhinolaryngology,Opthalmology,Obstetrics & Gynaecology,Orthopaedics,Cardio-thoracic & Vascular surgery,Paediatric surgery,Urology,Neurosurgery,Interventional Neuroradiology,Surgical Oncology,Medical Oncology,Radiation Oncology,Plastic & reconstructive,Burns management,Polytrauma,Oral and Maxillofacial Surgery,Paediatric cancer,General Medicine,Emergency Room Packages,Paediatric…	NA
Gujarat	Hybrid	Patan	PHC	Public	General Surgery,Otorhinolaryngology,Opthalmology,Obstetrics & Gynaecology,Orthopaedics,Cardio-thoracic & Vascular surgery,Paediatric surgery,Urology,Neurosurgery,Interventional Neuroradiology,Surgical Oncology,Medical Oncology,Radiation Oncology,Plastic & reconstructive,Burns management,Polytrauma,Oral and Maxillofacial Surgery,Paediatric cancer,General Medicine,Emergency Room Packages,Paediatric…	NA
Gujarat	Hybrid	Banas Kantha	PHC	Public	General Surgery,Otorhinolaryngology,Opthalmology,Obstetrics & Gynaecology,Orthopaedics,Cardio-thoracic & Vascular surgery,Paediatric surgery,Urology,Neurosurgery,Interventional Neuroradiology,Surgical Oncology,Medical Oncology,Radiation Oncology,Plastic & reconstructive,Burns management,Polytrauma,Oral and Maxillofacial Surgery,Paediatric cancer,General Medicine,Emergency Room Packages,Paediatric…	NA
Gujarat	Hybrid	Patan	PHC	Public	General Surgery,Otorhinolaryngology,Opthalmology,Obstetrics & Gynaecology,Orthopaedics,Cardio-thoracic & Vascular surgery,Paediatric surgery,Urology,Neurosurgery,Interventional Neuroradiology,Surgical Oncology,Medical Oncology,Radiation Oncology,Plastic & reconstructive,Burns management,Polytrauma,Oral and Maxillofacial Surgery,Paediatric cancer,General Medicine,Emergency Room Packages,Paediatric…	NA
Gujarat	Hybrid	Patan	PHC	Public	General Surgery,Otorhinolaryngology,Opthalmology,Obstetrics & Gynaecology,Orthopaedics,Cardio-thoracic & Vascular surgery,Paediatric surgery,Urology,Neurosurgery,Interventional Neuroradiology,Surgical Oncology,Medical Oncology,Radiation Oncology,Plastic & reconstructive,Burns management,Polytrauma,Oral and Maxillofacial Surgery,Paediatric cancer,General Medicine,Emergency Room Packages,Paediatric…	NA
Gujarat	Hybrid	Mahesana	PHC	Public	General Surgery,Otorhinolaryngology,Opthalmology,Obstetrics & Gynaecology,Orthopaedics,Cardio-thoracic & Vascular surgery,Paediatric surgery,Urology,Neurosurgery,Interventional Neuroradiology,Surgical Oncology,Medical Oncology,Radiation Oncology,Plastic & reconstructive,Burns management,Polytrauma,Oral and Maxillofacial Surgery,Paediatric cancer,General Medicine,Emergency Room Packages,Paediatric…	NA
Gujarat	Hybrid	Mahesana	PHC	Public	General Surgery,Otorhinolaryngology,Opthalmology,Obstetrics & Gynaecology,Orthopaedics,Cardio-thoracic & Vascular surgery,Paediatric surgery,Urology,Neurosurgery,Interventional Neuroradiology,Surgical Oncology,Medical Oncology,Radiation Oncology,Plastic & reconstructive,Burns management,Polytrauma,Oral and Maxillofacial Surgery,Paediatric cancer,General Medicine,Emergency Room Packages,Paediatric…	NA
Gujarat	Hybrid	Mahesana	PHC	Public	General Surgery,Otorhinolaryngology,Opthalmology,Obstetrics & Gynaecology,Orthopaedics,Cardio-thoracic & Vascular surgery,Paediatric surgery,Urology,Neurosurgery,Interventional Neuroradiology,Surgical Oncology,Medical Oncology,Radiation Oncology,Plastic & reconstructive,Burns management,Polytrauma,Oral and Maxillofacial Surgery,Paediatric cancer,General Medicine,Emergency Room Packages,Paediatric…	NA
Gujarat	Hybrid	Mahesana	PHC	Public	General Surgery,Otorhinolaryngology,Opthalmology,Obstetrics & Gynaecology,Orthopaedics,Cardio-thoracic & Vascular surgery,Paediatric surgery,Urology,Neurosurgery,Interventional Neuroradiology,Surgical Oncology,Medical Oncology,Radiation Oncology,Plastic & reconstructive,Burns management,Polytrauma,Oral and Maxillofacial Surgery,Paediatric cancer,General Medicine,Emergency Room Packages,Paediatric…	NA
Gujarat	Hybrid	Mahesana	PHC	Public	General Surgery,Otorhinolaryngology,Opthalmology,Obstetrics & Gynaecology,Orthopaedics,Cardio-thoracic & Vascular surgery,Paediatric surgery,Urology,Neurosurgery,Interventional Neuroradiology,Surgical Oncology,Medical Oncology,Radiation Oncology,Plastic & reconstructive,Burns management,Polytrauma,Oral and Maxillofacial Surgery,Paediatric cancer,General Medicine,Emergency Room Packages,Paediatric…	NA
Gujarat	Hybrid	Mahesana	PHC	Public	General Surgery,Otorhinolaryngology,Opthalmology,Obstetrics & Gynaecology,Orthopaedics,Cardio-thoracic & Vascular surgery,Paediatric surgery,Urology,Neurosurgery,Interventional Neuroradiology,Surgical Oncology,Medical Oncology,Radiation Oncology,Plastic & reconstructive,Burns management,Polytrauma,Oral and Maxillofacial Surgery,Paediatric cancer,General Medicine,Emergency Room Packages,Paediatric…	NA
Gujarat	Hybrid	Mahesana	PHC	Public	General Surgery,Otorhinolaryngology,Opthalmology,Obstetrics & Gynaecology,Orthopaedics,Cardio-thoracic & Vascular surgery,Paediatric surgery,Urology,Neurosurgery,Interventional Neuroradiology,Surgical Oncology,Medical Oncology,Radiation Oncology,Plastic & reconstructive,Burns management,Polytrauma,Oral and Maxillofacial Surgery,Paediatric cancer,General Medicine,Emergency Room Packages,Paediatric…	NA
Gujarat	Hybrid	Mahesana	PHC	Public	General Surgery,Otorhinolaryngology,Opthalmology,Obstetrics & Gynaecology,Orthopaedics,Cardio-thoracic & Vascular surgery,Paediatric surgery,Urology,Neurosurgery,Interventional Neuroradiology,Surgical Oncology,Medical Oncology,Radiation Oncology,Plastic & reconstructive,Burns management,Polytrauma,Oral and Maxillofacial Surgery,Paediatric cancer,General Medicine,Emergency Room Packages,Paediatric…	NA
Gujarat	Hybrid	Mahesana	PHC	Public	General Surgery,Otorhinolaryngology,Opthalmology,Obstetrics & Gynaecology,Orthopaedics,Cardio-thoracic & Vascular surgery,Paediatric surgery,Urology,Neurosurgery,Interventional Neuroradiology,Surgical Oncology,Medical Oncology,Radiation Oncology,Plastic & reconstructive,Burns management,Polytrauma,Oral and Maxillofacial Surgery,Paediatric cancer,General Medicine,Emergency Room Packages,Paediatric…	NA
Gujarat	Hybrid	Mahesana	PHC	Public	General Surgery,Otorhinolaryngology,Opthalmology,Obstetrics & Gynaecology,Orthopaedics,Cardio-thoracic & Vascular surgery,Paediatric surgery,Urology,Neurosurgery,Interventional Neuroradiology,Surgical Oncology,Medical Oncology,Radiation Oncology,Plastic & reconstructive,Burns management,Polytrauma,Oral and Maxillofacial Surgery,Paediatric cancer,General Medicine,Emergency Room Packages,Paediatric…	NA
Gujarat	Hybrid	Surendranagar	PHC	Public	General Surgery,Otorhinolaryngology,Opthalmology,Obstetrics & Gynaecology,Orthopaedics,Cardio-thoracic & Vascular surgery,Paediatric surgery,Urology,Neurosurgery,Interventional Neuroradiology,Surgical Oncology,Medical Oncology,Radiation Oncology,Plastic & reconstructive,Burns management,Polytrauma,Oral and Maxillofacial Surgery,Paediatric cancer,General Medicine,Emergency Room Packages,Paediatric…	NA
Gujarat	Hybrid	Mahesana	PHC	Public	General Surgery,Otorhinolaryngology,Opthalmology,Obstetrics & Gynaecology,Orthopaedics,Cardio-thoracic & Vascular surgery,Paediatric surgery,Urology,Neurosurgery,Interventional Neuroradiology,Surgical Oncology,Medical Oncology,Radiation Oncology,Plastic & reconstructive,Burns management,Polytrauma,Oral and Maxillofacial Surgery,Paediatric cancer,General Medicine,Emergency Room Packages,Paediatric…	NA
Gujarat	Hybrid	Mahesana	PHC	Public	General Surgery,Otorhinolaryngology,Opthalmology,Obstetrics & Gynaecology,Orthopaedics,Cardio-thoracic & Vascular surgery,Paediatric surgery,Urology,Neurosurgery,Interventional Neuroradiology,Surgical Oncology,Medical Oncology,Radiation Oncology,Plastic & reconstructive,Burns management,Polytrauma,Oral and Maxillofacial Surgery,Paediatric cancer,General Medicine,Emergency Room Packages,Paediatric…	NA
Gujarat	Hybrid	Mahesana	PHC	Public	General Surgery,Otorhinolaryngology,Opthalmology,Obstetrics & Gynaecology,Orthopaedics,Cardio-thoracic & Vascular surgery,Paediatric surgery,Urology,Neurosurgery,Interventional Neuroradiology,Surgical Oncology,Medical Oncology,Radiation Oncology,Plastic & reconstructive,Burns management,Polytrauma,Oral and Maxillofacial Surgery,Paediatric cancer,General Medicine,Emergency Room Packages,Paediatric…	NA
Gujarat	Hybrid	Mahesana	PHC	Public	General Surgery,Otorhinolaryngology,Opthalmology,Obstetrics & Gynaecology,Orthopaedics,Cardio-thoracic & Vascular surgery,Paediatric surgery,Urology,Neurosurgery,Interventional Neuroradiology,Surgical Oncology,Medical Oncology,Radiation Oncology,Plastic & reconstructive,Burns management,Polytrauma,Oral and Maxillofacial Surgery,Paediatric cancer,General Medicine,Emergency Room Packages,Paediatric…	NA
Gujarat	Hybrid	Mahesana	PHC	Public	General Surgery,Otorhinolaryngology,Opthalmology,Obstetrics & Gynaecology,Orthopaedics,Cardio-thoracic & Vascular surgery,Paediatric surgery,Urology,Neurosurgery,Interventional Neuroradiology,Surgical Oncology,Medical Oncology,Radiation Oncology,Plastic & reconstructive,Burns management,Polytrauma,Oral and Maxillofacial Surgery,Paediatric cancer,General Medicine,Emergency Room Packages,Paediatric…	NA
Gujarat	Hybrid	Mahesana	PHC	Public	Medical Oncology,Radiation Oncology,Plastic & reconstructive,Burns management,Polytrauma,Oral and Maxillofacial Surgery,Paediatric cancer,General Medicine,Emergency Room Packages,Paediatric medical management,Neo-natal,Cardiology,Urology,Neurosurgery,Mental Disorders Packages,General Surgery,Otorhinolaryngology,Opthalmology,Obstetrics & Gynaecology,Orthopaedics,Cardio-thoracic & Vascular surgery,…	NA
Gujarat	Hybrid	Mahesana	PHC	Public	General Surgery,Otorhinolaryngology,Opthalmology,Obstetrics & Gynaecology,Orthopaedics,Cardio-thoracic & Vascular surgery,Paediatric surgery,Urology,Neurosurgery,Interventional Neuroradiology,Surgical Oncology,Medical Oncology,Radiation Oncology,Plastic & reconstructive,Burns management,Polytrauma,Oral and Maxillofacial Surgery,Paediatric cancer,General Medicine,Emergency Room Packages,Paediatric…	NA
Gujarat	Hybrid	Mahesana	PHC	Public	General Surgery,Otorhinolaryngology,Opthalmology,Obstetrics & Gynaecology,Orthopaedics,Cardio-thoracic & Vascular surgery,Paediatric surgery,Urology,Neurosurgery,Interventional Neuroradiology,Surgical Oncology,Medical Oncology,Radiation Oncology,Plastic & reconstructive,Burns management,Polytrauma,Oral and Maxillofacial Surgery,Paediatric cancer,General Medicine,Emergency Room Packages,Paediatric…	NA
Gujarat	Hybrid	Mahesana	PHC	Public	General Surgery,Otorhinolaryngology,Opthalmology,Obstetrics & Gynaecology,Orthopaedics,Cardio-thoracic & Vascular surgery,Paediatric surgery,Urology,Neurosurgery,Interventional Neuroradiology,Surgical Oncology,Medical Oncology,Radiation Oncology,Plastic & reconstructive,Burns management,Polytrauma,Oral and Maxillofacial Surgery,Paediatric cancer,General Medicine,Emergency Room Packages,Paediatric…
Gujarat	Hybrid	Mahesana	PHC	Public	General Surgery,Otorhinolaryngology,Opthalmology,Obstetrics & Gynaecology,Orthopaedics,Cardio-thoracic & Vascular surgery,Paediatric surgery,Urology,Neurosurgery,Interventional Neuroradiology,Surgical Oncology,Medical Oncology,Radiation Oncology,Plastic & reconstructive,Burns management,Polytrauma,Oral and Maxillofacial Surgery,Paediatric cancer,General Medicine,Emergency Room Packages,Paediatric…	NA
Gujarat	Hybrid	Mahesana	PHC	Public	General Surgery,Otorhinolaryngology,Opthalmology,Obstetrics & Gynaecology,Orthopaedics,Cardio-thoracic & Vascular surgery,Paediatric surgery,Urology,Neurosurgery,Interventional Neuroradiology,Surgical Oncology,Medical Oncology,Radiation Oncology,Plastic & reconstructive,Burns management,Polytrauma,Oral and Maxillofacial Surgery,Paediatric cancer,General Medicine,Emergency Room Packages,Paediatric…	NA
Gujarat	Hybrid	Mahesana	PHC	Public	General Surgery,Otorhinolaryngology,Opthalmology,Obstetrics & Gynaecology,Orthopaedics,Cardio-thoracic & Vascular surgery,Paediatric surgery,Urology,Neurosurgery,Interventional Neuroradiology,Surgical Oncology,Medical Oncology,Radiation Oncology,Plastic & reconstructive,Burns management,Polytrauma,Oral and Maxillofacial Surgery,Paediatric cancer,General Medicine,Emergency Room Packages,Paediatric…	NA
Gujarat	Hybrid	Mahesana	PHC	Public	General Surgery,Otorhinolaryngology,Opthalmology,Obstetrics & Gynaecology,Orthopaedics,Cardio-thoracic & Vascular surgery,Paediatric surgery,Urology,Neurosurgery,Interventional Neuroradiology,Surgical Oncology,Medical Oncology,Radiation Oncology,Plastic & reconstructive,Burns management,Polytrauma,Oral and Maxillofacial Surgery,Paediatric cancer,General Medicine,Emergency Room Packages,Paediatric…	NA
Gujarat	Hybrid	Mahesana	PHC	Public	General Surgery,Otorhinolaryngology,Opthalmology,Obstetrics & Gynaecology,Orthopaedics,Cardio-thoracic & Vascular surgery,Paediatric surgery,Urology,Neurosurgery,Interventional Neuroradiology,Surgical Oncology,Medical Oncology,Radiation Oncology,Plastic & reconstructive,Burns management,Polytrauma,Oral and Maxillofacial Surgery,Paediatric cancer,General Medicine,Emergency Room Packages,Paediatric…	NA
Gujarat	Hybrid	Mahesana	PHC	Public	General Surgery,Otorhinolaryngology,Opthalmology,Obstetrics & Gynaecology,Orthopaedics,Cardio-thoracic & Vascular surgery,Paediatric surgery,Urology,Neurosurgery,Interventional Neuroradiology,Surgical Oncology,Medical Oncology,Radiation Oncology,Plastic & reconstructive,Burns management,Polytrauma,Oral and Maxillofacial Surgery,Paediatric cancer,General Medicine,Emergency Room Packages,Paediatric…	NA
Gujarat	Hybrid	Mahesana	PHC	Public	General Surgery,Otorhinolaryngology,Opthalmology,Obstetrics & Gynaecology,Orthopaedics,Cardio-thoracic & Vascular surgery,Paediatric surgery,Urology,Neurosurgery,Interventional Neuroradiology,Surgical Oncology,Medical Oncology,Radiation Oncology,Plastic & reconstructive,Burns management,Polytrauma,Oral and Maxillofacial Surgery,Paediatric cancer,General Medicine,Emergency Room Packages,Paediatric…	NA
Gujarat	Hybrid	Sabar Kantha	PHC	Public	General Surgery,Otorhinolaryngology,Opthalmology,Obstetrics & Gynaecology,Orthopaedics,Cardio-thoracic & Vascular surgery,Paediatric surgery,Urology,Neurosurgery,Interventional Neuroradiology,Surgical Oncology,Medical Oncology,Radiation Oncology,Plastic & reconstructive,Burns management,Polytrauma,Oral and Maxillofacial Surgery,Paediatric cancer,General Medicine,Emergency Room Packages,Paediatric…	NA
Gujarat	Hybrid	Sabar Kantha	PHC	Public	General Surgery,Otorhinolaryngology,Opthalmology,Obstetrics & Gynaecology,Orthopaedics,Cardio-thoracic & Vascular surgery,Paediatric surgery,Urology,Neurosurgery,Interventional Neuroradiology,Surgical Oncology,Medical Oncology,Radiation Oncology,Plastic & reconstructive,Burns management,Polytrauma,Oral and Maxillofacial Surgery,Paediatric cancer,General Medicine,Emergency Room Packages,Paediatric…	NA
Gujarat	Hybrid	Sabar Kantha	PHC	Public	General Surgery,Otorhinolaryngology,Opthalmology,Obstetrics & Gynaecology,Orthopaedics,Cardio-thoracic & Vascular surgery,Paediatric surgery,Urology,Neurosurgery,Interventional Neuroradiology,Surgical Oncology,Medical Oncology,Radiation Oncology,Plastic & reconstructive,Burns management,Polytrauma,Oral and Maxillofacial Surgery,Paediatric cancer,General Medicine,Emergency Room Packages,Paediatric…	NA
Gujarat	Hybrid	Sabar Kantha	PHC	Public	Otorhinolaryngology,Opthalmology,Obstetrics & Gynaecology,Orthopaedics,Cardio-thoracic & Vascular surgery,Paediatric surgery,Urology,Neurosurgery,Interventional Neuroradiology,Surgical Oncology,Medical Oncology,Radiation Oncology,Plastic & reconstructive,Burns management,Polytrauma,Oral and Maxillofacial Surgery,Paediatric cancer,General Medicine,Emergency Room Packages,Paediatric medical managem…	NA
Gujarat	Hybrid	Sabar Kantha	PHC	Public	General Surgery,Otorhinolaryngology,Opthalmology,Obstetrics & Gynaecology,Orthopaedics,Cardio-thoracic & Vascular surgery,Paediatric surgery,Urology,Neurosurgery,Interventional Neuroradiology,Surgical Oncology,Medical Oncology,Radiation Oncology,Plastic & reconstructive,Burns management,Polytrauma,Oral and Maxillofacial Surgery,Paediatric cancer,General Medicine,Emergency Room Packages,Paediatric…	NA
Gujarat	Hybrid	Sabar Kantha	PHC	Public	General Surgery,Otorhinolaryngology,Opthalmology,Obstetrics & Gynaecology,Orthopaedics,Cardio-thoracic & Vascular surgery,Paediatric surgery,Urology,Neurosurgery,Interventional Neuroradiology,Surgical Oncology,Medical Oncology,Radiation Oncology,Plastic & reconstructive,Burns management,Polytrauma,Oral and Maxillofacial Surgery,Paediatric cancer,General Medicine,Emergency Room Packages,Paediatric…	NA
Gujarat	Hybrid	Sabar Kantha	PHC	Public	General Surgery,Otorhinolaryngology,Opthalmology,Obstetrics & Gynaecology,Orthopaedics,Cardio-thoracic & Vascular surgery,Paediatric surgery,Urology,Neurosurgery,Interventional Neuroradiology,Surgical Oncology,Medical Oncology,Radiation Oncology,Plastic & reconstructive,Burns management,Polytrauma,Oral and Maxillofacial Surgery,Paediatric cancer,General Medicine,Emergency Room Packages,Paediatric…	NA
Gujarat	Hybrid	Sabar Kantha	PHC	Public	General Surgery,Otorhinolaryngology,Opthalmology,Obstetrics & Gynaecology,Orthopaedics,Cardio-thoracic & Vascular surgery,Paediatric surgery,Urology,Neurosurgery,Interventional Neuroradiology,Surgical Oncology,Medical Oncology,Radiation Oncology,Plastic & reconstructive,Burns management,Polytrauma,Oral and Maxillofacial Surgery,Paediatric cancer,General Medicine,Emergency Room Packages,Paediatric…	NA
Gujarat	Hybrid	Sabar Kantha	PHC	Public	General Surgery,Otorhinolaryngology,Opthalmology,Obstetrics & Gynaecology,Orthopaedics,Cardio-thoracic & Vascular surgery,Paediatric surgery,Urology,Neurosurgery,Interventional Neuroradiology,Surgical Oncology,Medical Oncology,Radiation Oncology,Plastic & reconstructive,Burns management,Polytrauma,Oral and Maxillofacial Surgery,Paediatric cancer,General Medicine,Emergency Room Packages,Paediatric…	NA
Gujarat	Hybrid	Sabar Kantha	PHC	Public	General Surgery,Otorhinolaryngology,Opthalmology,Obstetrics & Gynaecology,Orthopaedics,Cardio-thoracic & Vascular surgery,Paediatric surgery,Urology,Neurosurgery,Interventional Neuroradiology,Surgical Oncology,Medical Oncology,Radiation Oncology,Plastic & reconstructive,Burns management,Polytrauma,Oral and Maxillofacial Surgery,Paediatric cancer,General Medicine,Emergency Room Packages,Paediatric…	NA
Gujarat	Hybrid	Sabar Kantha	PHC	Public	General Surgery,Otorhinolaryngology,Opthalmology,Obstetrics & Gynaecology,Orthopaedics,Cardio-thoracic & Vascular surgery,Paediatric surgery,Urology,Neurosurgery,Interventional Neuroradiology,Surgical Oncology,Medical Oncology,Radiation Oncology,Plastic & reconstructive,Burns management,Polytrauma,Oral and Maxillofacial Surgery,Paediatric cancer,General Medicine,Emergency Room Packages,Paediatric…	NA
Gujarat	Hybrid	Sabar Kantha	PHC	Public	General Surgery,Otorhinolaryngology,Opthalmology,Obstetrics & Gynaecology,Orthopaedics,Cardio-thoracic & Vascular surgery,Paediatric surgery,Urology,Neurosurgery,Interventional Neuroradiology,Surgical Oncology,Medical Oncology,Radiation Oncology,Plastic & reconstructive,Burns management,Polytrauma,Oral and Maxillofacial Surgery,Paediatric cancer,General Medicine,Emergency Room Packages,Paediatric…	NA
Gujarat	Hybrid	Banas Kantha	PHC	Public	General Surgery,Otorhinolaryngology,Opthalmology,Obstetrics & Gynaecology,Orthopaedics,Cardio-thoracic & Vascular surgery,Paediatric surgery,Urology,Neurosurgery,Interventional Neuroradiology,Surgical Oncology,Medical Oncology,Radiation Oncology,Plastic & reconstructive,Burns management,Polytrauma,Oral and Maxillofacial Surgery,Paediatric cancer,General Medicine,Emergency Room Packages,Paediatric…	NA
Gujarat	Hybrid	Arvalli	PHC	Public	General Surgery,Otorhinolaryngology,Opthalmology,Obstetrics & Gynaecology,Orthopaedics,Cardio-thoracic & Vascular surgery,Paediatric surgery,Urology,Neurosurgery,Interventional Neuroradiology,Surgical Oncology,Medical Oncology,Radiation Oncology,Plastic & reconstructive,Burns management,Polytrauma,Oral and Maxillofacial Surgery,Paediatric cancer,General Medicine,Emergency Room Packages,Paediatric…	NA
Gujarat	Hybrid	Arvalli	PHC	Public	General Medicine,Emergency Room Packages,Mental Disorders Packages,Paediatric medical management,Neurosurgery,Urology,Cardiology,Neo-natal,Paediatric cancer,Oral and Maxillofacial Surgery,Polytrauma,Plastic & reconstructive,Burns management,Radiation Oncology,Medical Oncology,Surgical Oncology,Interventional Neuroradiology,Paediatric surgery,Cardio-thoracic & Vascular surgery,Orthopaedics,Obstetr…	NA
Gujarat	Hybrid	Arvalli	PHC	Public	General Surgery,Otorhinolaryngology,Opthalmology,Obstetrics & Gynaecology,Orthopaedics,Cardio-thoracic & Vascular surgery,Paediatric surgery,Urology,Neurosurgery,Interventional Neuroradiology,Surgical Oncology,Medical Oncology,Radiation Oncology,Plastic & reconstructive,Burns management,Polytrauma,Oral and Maxillofacial Surgery,Paediatric cancer,General Medicine,Emergency Room Packages,Paediatric…	NA
Gujarat	Hybrid	Arvalli	PHC	Public	General Surgery,Otorhinolaryngology,Opthalmology,Obstetrics & Gynaecology,Orthopaedics,Cardio-thoracic & Vascular surgery,Paediatric surgery,Urology,Neurosurgery,Interventional Neuroradiology,Surgical Oncology,Medical Oncology,Radiation Oncology,Plastic & reconstructive,Burns management,Polytrauma,Oral and Maxillofacial Surgery,Paediatric cancer,General Medicine,Emergency Room Packages,Paediatric…	NA
Gujarat	Hybrid	Arvalli	PHC	Public	General Surgery,Otorhinolaryngology,Opthalmology,Obstetrics & Gynaecology,Orthopaedics,Cardio-thoracic & Vascular surgery,Paediatric surgery,Urology,Neurosurgery,Interventional Neuroradiology,Surgical Oncology,Medical Oncology,Radiation Oncology,Plastic & reconstructive,Burns management,Polytrauma,Oral and Maxillofacial Surgery,Paediatric cancer,General Medicine,Emergency Room Packages,Paediatric…	NA
Gujarat	Hybrid	Arvalli	PHC	Public	General Surgery,Otorhinolaryngology,Opthalmology,Obstetrics & Gynaecology,Orthopaedics,Cardio-thoracic & Vascular surgery,Paediatric surgery,Urology,Neurosurgery,Interventional Neuroradiology,Surgical Oncology,Medical Oncology,Radiation Oncology,Plastic & reconstructive,Burns management,Polytrauma,Oral and Maxillofacial Surgery,Paediatric cancer,General Medicine,Emergency Room Packages,Paediatric…	NA
Gujarat	Hybrid	Arvalli	PHC	Public	General Surgery,Otorhinolaryngology,Opthalmology,Obstetrics & Gynaecology,Orthopaedics,Cardio-thoracic & Vascular surgery,Paediatric surgery,Urology,Neurosurgery,Interventional Neuroradiology,Surgical Oncology,Medical Oncology,Radiation Oncology,Plastic & reconstructive,Burns management,Polytrauma,Oral and Maxillofacial Surgery,Paediatric cancer,General Medicine,Emergency Room Packages,Paediatric…	NA
Gujarat	Hybrid	Sabar Kantha	PHC	Public	General Surgery,Otorhinolaryngology,Opthalmology,Obstetrics & Gynaecology,Orthopaedics,Cardio-thoracic & Vascular surgery,Paediatric surgery,Urology,Neurosurgery,Interventional Neuroradiology,Surgical Oncology,Medical Oncology,Radiation Oncology,Plastic & reconstructive,Burns management,Polytrauma,Oral and Maxillofacial Surgery,Paediatric cancer,General Medicine,Emergency Room Packages,Paediatric…	NA
Gujarat	Hybrid	Sabar Kantha	PHC	Public	General Surgery,Otorhinolaryngology,Opthalmology,Obstetrics & Gynaecology,Orthopaedics,Cardio-thoracic & Vascular surgery,Paediatric surgery,Urology,Neurosurgery,Interventional Neuroradiology,Surgical Oncology,Medical Oncology,Radiation Oncology,Plastic & reconstructive,Burns management,Polytrauma,Oral and Maxillofacial Surgery,Paediatric cancer,General Medicine,Emergency Room Packages,Paediatric…	NA
Gujarat	Hybrid	Sabar Kantha	PHC	Public	General Surgery,Otorhinolaryngology,Opthalmology,Obstetrics & Gynaecology,Orthopaedics,Cardio-thoracic & Vascular surgery,Paediatric surgery,Urology,Neurosurgery,Interventional Neuroradiology,Surgical Oncology,Medical Oncology,Radiation Oncology,Plastic & reconstructive,Burns management,Polytrauma,Oral and Maxillofacial Surgery,Paediatric cancer,General Medicine,Emergency Room Packages,Paediatric…	NA
Gujarat	Hybrid	Sabar Kantha	PHC	Public	General Surgery,Otorhinolaryngology,Opthalmology,Obstetrics & Gynaecology,Orthopaedics,Cardio-thoracic & Vascular surgery,Paediatric surgery,Urology,Neurosurgery,Interventional Neuroradiology,Surgical Oncology,Medical Oncology,Radiation Oncology,Plastic & reconstructive,Burns management,Polytrauma,Oral and Maxillofacial Surgery,Paediatric cancer,General Medicine,Emergency Room Packages,Paediatric…	NA
Gujarat	Hybrid	Sabar Kantha	PHC	Public	General Surgery,Otorhinolaryngology,Opthalmology,Obstetrics & Gynaecology,Orthopaedics,Cardio-thoracic & Vascular surgery,Paediatric surgery,Urology,Neurosurgery,Interventional Neuroradiology,Surgical Oncology,Medical Oncology,Radiation Oncology,Plastic & reconstructive,Burns management,Polytrauma,Oral and Maxillofacial Surgery,Paediatric cancer,General Medicine,Emergency Room Packages,Paediatric…	NA
Gujarat	Hybrid	Sabar Kantha	PHC	Public	General Surgery,Otorhinolaryngology,Opthalmology,Obstetrics & Gynaecology,Orthopaedics,Cardio-thoracic & Vascular surgery,Paediatric surgery,Urology,Neurosurgery,Interventional Neuroradiology,Surgical Oncology,Medical Oncology,Radiation Oncology,Plastic & reconstructive,Burns management,Polytrauma,Oral and Maxillofacial Surgery,Paediatric cancer,General Medicine,Emergency Room Packages,Paediatric…	NA
Gujarat	Hybrid	Sabar Kantha	PHC	Public	General Surgery,Otorhinolaryngology,Opthalmology,Obstetrics & Gynaecology,Orthopaedics,Cardio-thoracic & Vascular surgery,Paediatric surgery,Urology,Neurosurgery,Interventional Neuroradiology,Surgical Oncology,Medical Oncology,Radiation Oncology,Plastic & reconstructive,Burns management,Polytrauma,Oral and Maxillofacial Surgery,Paediatric cancer,General Medicine,Emergency Room Packages,Paediatric…	NA
Gujarat	Hybrid	Sabar Kantha	PHC	Public	General Surgery,Otorhinolaryngology,Opthalmology,Obstetrics & Gynaecology,Orthopaedics,Cardio-thoracic & Vascular surgery,Paediatric surgery,Urology,Neurosurgery,Interventional Neuroradiology,Surgical Oncology,Medical Oncology,Radiation Oncology,Plastic & reconstructive,Burns management,Polytrauma,Oral and Maxillofacial Surgery,Paediatric cancer,General Medicine,Emergency Room Packages,Paediatric…	NA
Gujarat	Hybrid	Patan	PHC	Public	General Surgery,Otorhinolaryngology,Opthalmology,Obstetrics & Gynaecology,Orthopaedics,Cardio-thoracic & Vascular surgery,Paediatric surgery,Urology,Neurosurgery,Interventional Neuroradiology,Surgical Oncology,Medical Oncology,Radiation Oncology,Plastic & reconstructive,Burns management,Polytrauma,Oral and Maxillofacial Surgery,Paediatric cancer,General Medicine,Emergency Room Packages,Paediatric…	NA
Gujarat	Hybrid	Sabar Kantha	PHC	Public	General Surgery,Otorhinolaryngology,Opthalmology,Obstetrics & Gynaecology,Orthopaedics,Cardio-thoracic & Vascular surgery,Paediatric surgery,Urology,Neurosurgery,Interventional Neuroradiology,Surgical Oncology,Medical Oncology,Radiation Oncology,Plastic & reconstructive,Burns management,Polytrauma,Oral and Maxillofacial Surgery,Paediatric cancer,General Medicine,Emergency Room Packages,Paediatric…	NA
Gujarat	Hybrid	Sabar Kantha	PHC	Public	General Surgery,Otorhinolaryngology,Opthalmology,Obstetrics & Gynaecology,Orthopaedics,Cardio-thoracic & Vascular surgery,Paediatric surgery,Urology,Neurosurgery,Interventional Neuroradiology,Surgical Oncology,Medical Oncology,Radiation Oncology,Plastic & reconstructive,Burns management,Polytrauma,Oral and Maxillofacial Surgery,Paediatric cancer,General Medicine,Emergency Room Packages,Paediatric…	NA
Gujarat	Hybrid	Sabar Kantha	PHC	Public	General Surgery,Otorhinolaryngology,Opthalmology,Obstetrics & Gynaecology,Orthopaedics,Cardio-thoracic & Vascular surgery,Paediatric surgery,Urology,Neurosurgery,Interventional Neuroradiology,Surgical Oncology,Medical Oncology,Radiation Oncology,Plastic & reconstructive,Burns management,Polytrauma,Oral and Maxillofacial Surgery,Paediatric cancer,General Medicine,Emergency Room Packages,Paediatric…	NA
Gujarat	Hybrid	Sabar Kantha	PHC	Public	General Surgery,Otorhinolaryngology,Opthalmology,Obstetrics & Gynaecology,Orthopaedics,Cardio-thoracic & Vascular surgery,Paediatric surgery,Urology,Neurosurgery,Interventional Neuroradiology,Surgical Oncology,Medical Oncology,Radiation Oncology,Plastic & reconstructive,Burns management,Polytrauma,Oral and Maxillofacial Surgery,Paediatric cancer,General Medicine,Emergency Room Packages,Paediatric…	NA
Gujarat	Hybrid	Sabar Kantha	PHC	Public	General Surgery,Otorhinolaryngology,Opthalmology,Obstetrics & Gynaecology,Orthopaedics,Cardio-thoracic & Vascular surgery,Paediatric surgery,Urology,Neurosurgery,Interventional Neuroradiology,Surgical Oncology,Medical Oncology,Radiation Oncology,Plastic & reconstructive,Burns management,Polytrauma,Oral and Maxillofacial Surgery,Paediatric cancer,General Medicine,Emergency Room Packages,Paediatric…	NA
Gujarat	Hybrid	Sabar Kantha	PHC	Public	General Surgery,Otorhinolaryngology,Opthalmology,Obstetrics & Gynaecology,Orthopaedics,Cardio-thoracic & Vascular surgery,Paediatric surgery,Urology,Neurosurgery,Interventional Neuroradiology,Surgical Oncology,Medical Oncology,Radiation Oncology,Plastic & reconstructive,Burns management,Polytrauma,Oral and Maxillofacial Surgery,Paediatric cancer,General Medicine,Emergency Room Packages,Paediatric…	NA
Gujarat	Hybrid	Gandhinagar	CHC	Public	General Surgery,Otorhinolaryngology,Opthalmology,Orthopaedics,Orthopaedics,Cardio-thoracic & Vascular surgery,Paediatric surgery,Urology,Neurosurgery,Interventional Neuroradiology,Surgical Oncology,Medical Oncology,Radiation Oncology,Plastic & reconstructive,Burns management,Polytrauma,Oral and Maxillofacial Surgery,Paediatric cancer,General Medicine,Emergency Room Packages,Paediatric medical man…	NA
Gujarat	Hybrid	Gandhinagar	PHC	Public	General Surgery,Otorhinolaryngology,Opthalmology,Obstetrics & Gynaecology,Orthopaedics,Cardio-thoracic & Vascular surgery,Paediatric surgery,Urology,Neurosurgery,Interventional Neuroradiology,Surgical Oncology,Medical Oncology,Radiation Oncology,Plastic & reconstructive,Burns management,Polytrauma,Oral and Maxillofacial Surgery,Paediatric cancer,General Medicine,Emergency Room Packages,Paediatric…	NA
Gujarat	Hybrid	Gandhinagar		Private (For Profit)	Cardio-thoracic & Vascular surgery,Paediatric surgery,Urology,Neurosurgery,Interventional Neuroradiology,Surgical Oncology,Medical Oncology,Radiation Oncology,Plastic & reconstructive,Burns management,Polytrauma,Oral and Maxillofacial Surgery,Paediatric cancer,General Medicine,Emergency Room Packages,Neo-natal,Mental Disorders Packages,Paediatric medical management,General Surgery,Orthopaedics,Ca…	NA
Gujarat	Hybrid	Gandhinagar	PHC	Public	General Surgery,Otorhinolaryngology,Opthalmology,Obstetrics & Gynaecology,Orthopaedics,Cardio-thoracic & Vascular surgery,Paediatric surgery,Urology,Neurosurgery,Interventional Neuroradiology,Surgical Oncology,Medical Oncology,Radiation Oncology,Plastic & reconstructive,Burns management,Polytrauma,Oral and Maxillofacial Surgery,Paediatric cancer,General Medicine,Emergency Room Packages,Paediatric…
Gujarat	Hybrid	Gandhinagar	PHC	Public	General Surgery,Otorhinolaryngology,Opthalmology,Obstetrics & Gynaecology,Orthopaedics,Cardio-thoracic & Vascular surgery,Paediatric surgery,Urology,Neurosurgery,Interventional Neuroradiology,Surgical Oncology,Medical Oncology,Radiation Oncology,Plastic & reconstructive,Burns management,Polytrauma,Oral and Maxillofacial Surgery,Paediatric cancer,General Medicine,Emergency Room Packages,Paediatric…
Gujarat	Hybrid	Ahmadabad	SH	Public	General Surgery,Otorhinolaryngology,Opthalmology,Obstetrics & Gynaecology,Orthopaedics,Cardio-thoracic & Vascular surgery,Paediatric surgery,Plastic & reconstructive,Burns management,Polytrauma,Oral and Maxillofacial Surgery,Paediatric cancer,General Medicine,Emergency Room Packages,Paediatric medical management,Neo-natal,Cardiology,Mental Disorders Packages,Medical Oncology,Radiation Oncology,Su…
Gujarat	Hybrid	Ahmadabad	SH	Public	General Surgery,Otorhinolaryngology,Opthalmology,Obstetrics & Gynaecology,Orthopaedics,Paediatric surgery,Urology,Neurosurgery,Interventional Neuroradiology,Surgical Oncology,Medical Oncology,Radiation Oncology,Plastic & reconstructive,Burns management,Polytrauma,Oral and Maxillofacial Surgery,Paediatric cancer,General Medicine,Emergency Room Packages,Paediatric medical management,Neo-natal,Menta…
Gujarat	Hybrid	Ahmadabad	CHC	Public	General Surgery,Otorhinolaryngology,Opthalmology,Obstetrics & Gynaecology,Orthopaedics,Cardio-thoracic & Vascular surgery,Paediatric surgery,Urology,Neurosurgery,Interventional Neuroradiology,Surgical Oncology,Medical Oncology,Radiation Oncology,Plastic & reconstructive,Burns management,Polytrauma,Oral and Maxillofacial Surgery,Paediatric cancer,General Medicine,Emergency Room Packages,Paediatric…
Gujarat	Hybrid	Ahmadabad	CHC	Public	General Surgery,Otorhinolaryngology,Opthalmology,Obstetrics & Gynaecology,Orthopaedics,Cardio-thoracic & Vascular surgery,Paediatric surgery,Urology,Neurosurgery,Interventional Neuroradiology,Surgical Oncology,Medical Oncology,Radiation Oncology,Plastic & reconstructive,Burns management,Polytrauma,Oral and Maxillofacial Surgery,Paediatric cancer,General Medicine,Emergency Room Packages,Paediatric…	NA
Gujarat	Hybrid	Ahmadabad	CHC	Public	General Surgery,Otorhinolaryngology,Opthalmology,Obstetrics & Gynaecology,Orthopaedics,Cardio-thoracic & Vascular surgery,Paediatric surgery,Urology,Neurosurgery,Interventional Neuroradiology,Surgical Oncology,Medical Oncology,Radiation Oncology,Plastic & reconstructive,Burns management,Polytrauma,Oral and Maxillofacial Surgery,Paediatric cancer,General Medicine,Emergency Room Packages,Paediatric…	NA
Gujarat	Hybrid	Ahmadabad	CHC	Public	General Surgery,Otorhinolaryngology,Opthalmology,Obstetrics & Gynaecology,Orthopaedics,Cardio-thoracic & Vascular surgery,Paediatric surgery,Urology,Neurosurgery,Interventional Neuroradiology,Surgical Oncology,Medical Oncology,Radiation Oncology,Plastic & reconstructive,Burns management,Polytrauma,Oral and Maxillofacial Surgery,Paediatric cancer,General Medicine,Emergency Room Packages,Paediatric…	NA
Gujarat	Hybrid	Ahmadabad	CHC	Public	General Surgery,Otorhinolaryngology,Opthalmology,Obstetrics & Gynaecology,Orthopaedics,Cardio-thoracic & Vascular surgery,Paediatric surgery,Urology,Neurosurgery,Interventional Neuroradiology,Surgical Oncology,Medical Oncology,Radiation Oncology,Plastic & reconstructive,Burns management,Polytrauma,Oral and Maxillofacial Surgery,Paediatric cancer,General Medicine,Emergency Room Packages,Paediatric…	NA
Gujarat	Hybrid	Ahmadabad	CHC	Public	General Surgery,Otorhinolaryngology,Opthalmology,Obstetrics & Gynaecology,Orthopaedics,Cardio-thoracic & Vascular surgery,Paediatric surgery,Urology,Neurosurgery,Interventional Neuroradiology,Surgical Oncology,Medical Oncology,Radiation Oncology,Plastic & reconstructive,Burns management,Polytrauma,Oral and Maxillofacial Surgery,Paediatric cancer,General Medicine,Emergency Room Packages,Paediatric…	NA
Gujarat	Hybrid	Ahmadabad	SH	Public	General Surgery,Otorhinolaryngology,Opthalmology,Obstetrics & Gynaecology,Cardio-thoracic & Vascular surgery,Paediatric surgery,Urology,Neurosurgery,Interventional Neuroradiology,Surgical Oncology,Medical Oncology,Radiation Oncology,Plastic & reconstructive,Burns management,Polytrauma,Oral and Maxillofacial Surgery,Paediatric cancer,General Medicine,Emergency Room Packages,Paediatric medical mana…	-NA-
Gujarat	Hybrid	Ahmadabad	PHC	Public	General Surgery,Otorhinolaryngology,Opthalmology,Obstetrics & Gynaecology,Orthopaedics,Cardio-thoracic & Vascular surgery,Paediatric surgery,Urology,Neurosurgery,Interventional Neuroradiology,Surgical Oncology,Medical Oncology,Radiation Oncology,Plastic & reconstructive,Burns management,Polytrauma,Oral and Maxillofacial Surgery,Paediatric cancer,General Medicine,Emergency Room Packages,Neo-natal,…	-NA-
Gujarat	Hybrid	Ahmadabad	GH	Public	General Surgery,Otorhinolaryngology,Opthalmology,Obstetrics & Gynaecology,Cardio-thoracic & Vascular surgery,Paediatric surgery,Urology,Neurosurgery,Interventional Neuroradiology,Surgical Oncology,Medical Oncology,Radiation Oncology,Plastic & reconstructive,Burns management,Polytrauma,Oral and Maxillofacial Surgery,Paediatric cancer,General Medicine,Emergency Room Packages,Neo-natal,Cardiology,Pa…	-NA-
Gujarat	Hybrid	Ahmadabad	GH	Public	Otorhinolaryngology,Opthalmology,Obstetrics & Gynaecology,Orthopaedics,Cardio-thoracic & Vascular surgery,Paediatric surgery,Urology,Neurosurgery,Interventional Neuroradiology,Surgical Oncology,Medical Oncology,Radiation Oncology,Plastic & reconstructive,Burns management,Polytrauma,Oral and Maxillofacial Surgery,Paediatric cancer,General Medicine,Emergency Room Packages,Neo-natal,Cardiology,Paedi…	-NA-
Gujarat	Hybrid	Ahmadabad	CHC	Public	Otorhinolaryngology,Opthalmology,Obstetrics & Gynaecology,Orthopaedics,Cardio-thoracic & Vascular surgery,Paediatric surgery,Urology,Neurosurgery,Interventional Neuroradiology,Surgical Oncology,Medical Oncology,Radiation Oncology,Plastic & reconstructive,Burns management,Polytrauma,Oral and Maxillofacial Surgery,Paediatric cancer,General Medicine,Emergency Room Packages,Paediatric medical managem…	-NA-
Gujarat	Hybrid	Ahmadabad	PHC	Public	General Surgery,Otorhinolaryngology,Opthalmology,Obstetrics & Gynaecology,Orthopaedics,Cardio-thoracic & Vascular surgery,Paediatric surgery,Urology,Neurosurgery,Interventional Neuroradiology,Surgical Oncology,Medical Oncology,Radiation Oncology,Plastic & reconstructive,Burns management,Polytrauma,Oral and Maxillofacial Surgery,Paediatric cancer,General Medicine,Emergency Room Packages,Paediatric…	NA
Gujarat	Hybrid	Ahmadabad	GH	Public	Otorhinolaryngology,Opthalmology,Obstetrics & Gynaecology,Cardio-thoracic & Vascular surgery,Paediatric surgery,Urology,Neurosurgery,Interventional Neuroradiology,Surgical Oncology,Medical Oncology,Radiation Oncology,Plastic & reconstructive,Burns management,Polytrauma,Oral and Maxillofacial Surgery,Paediatric cancer,General Medicine,Emergency Room Packages,Neo-natal,Cardiology,Paediatric medical…	-NA-
Gujarat	Hybrid	Ahmadabad	CHC	Public	Otorhinolaryngology,Opthalmology,Obstetrics & Gynaecology,Orthopaedics,Cardio-thoracic & Vascular surgery,Paediatric surgery,Urology,Neurosurgery,Interventional Neuroradiology,Surgical Oncology,Medical Oncology,Radiation Oncology,Plastic & reconstructive,Burns management,Polytrauma,Oral and Maxillofacial Surgery,Paediatric cancer,General Medicine,Emergency Room Packages,Neo-natal,Cardiology,Paedi…	-NA-
Gujarat	Hybrid	Ahmadabad	CHC	Public	General Surgery,Otorhinolaryngology,Opthalmology,Obstetrics & Gynaecology,Orthopaedics,Cardio-thoracic & Vascular surgery,Paediatric surgery,Urology,Neurosurgery,Interventional Neuroradiology,Surgical Oncology,Medical Oncology,Radiation Oncology,Plastic & reconstructive,Burns management,Polytrauma,Oral and Maxillofacial Surgery,Paediatric cancer,General Medicine,Emergency Room Packages,Paediatric…	-NA-
Gujarat	Hybrid	Surendranagar	CHC	Public	General Surgery,Otorhinolaryngology,Opthalmology,Obstetrics & Gynaecology,Orthopaedics,Cardio-thoracic & Vascular surgery,Paediatric surgery,Urology,Neurosurgery,Interventional Neuroradiology,Surgical Oncology,Medical Oncology,Radiation Oncology,Plastic & reconstructive,Burns management,Polytrauma,Paediatric cancer,General Medicine,Emergency Room Packages,Paediatric medical management,Neo-natal,C…	-NA-
Gujarat	Hybrid	Surendranagar	GH	Public	Otorhinolaryngology,Opthalmology,Obstetrics & Gynaecology,Cardio-thoracic & Vascular surgery,Paediatric surgery,Urology,Neurosurgery,Interventional Neuroradiology,Surgical Oncology,Medical Oncology,Radiation Oncology,Plastic & reconstructive,Burns management,Polytrauma,Oral and Maxillofacial Surgery,Paediatric cancer,General Medicine,Emergency Room Packages,Neo-natal,Cardiology,Paediatric medical…	-NA-
Gujarat	Hybrid	Surendranagar	CHC	Public	Opthalmology,Obstetrics & Gynaecology,Orthopaedics,Cardio-thoracic & Vascular surgery,Paediatric surgery,Urology,Neurosurgery,Interventional Neuroradiology,Surgical Oncology,Medical Oncology,Radiation Oncology,Plastic & reconstructive,Burns management,Polytrauma,Oral and Maxillofacial Surgery,Paediatric cancer,General Medicine,Emergency Room Packages,Paediatric medical management,Neo-natal,Cardio…	-NA-
Gujarat	Hybrid	Surendranagar	CHC	Public	Otorhinolaryngology,Opthalmology,Obstetrics & Gynaecology,Orthopaedics,Cardio-thoracic & Vascular surgery,Paediatric surgery,Urology,Neurosurgery,Interventional Neuroradiology,Surgical Oncology,Medical Oncology,Radiation Oncology,Plastic & reconstructive,Burns management,Polytrauma,Oral and Maxillofacial Surgery,Paediatric cancer,General Medicine,Emergency Room Packages,Neo-natal,Cardiology,Paedi…	-NA-
Gujarat	Hybrid	Morbi	CHC	Public	Otorhinolaryngology,Opthalmology,Obstetrics & Gynaecology,Orthopaedics,Cardio-thoracic & Vascular surgery,Paediatric surgery,Urology,Neurosurgery,Interventional Neuroradiology,Surgical Oncology,Medical Oncology,Radiation Oncology,Plastic & reconstructive,Burns management,Polytrauma,Oral and Maxillofacial Surgery,Paediatric cancer,General Medicine,Emergency Room Packages,Paediatric medical managem…	-NA-
Gujarat	Hybrid	Surendranagar	GH	Public	Otorhinolaryngology,Opthalmology,Obstetrics & Gynaecology,Cardio-thoracic & Vascular surgery,Paediatric surgery,Urology,Neurosurgery,Interventional Neuroradiology,Surgical Oncology,Medical Oncology,Radiation Oncology,Plastic & reconstructive,Burns management,Polytrauma,Oral and Maxillofacial Surgery,Paediatric cancer,General Medicine,Emergency Room Packages,Neo-natal,Cardiology,Paediatric medical…	-NA-
Gujarat	Hybrid	Surendranagar	CHC	Public	General Surgery,Otorhinolaryngology,Opthalmology,Obstetrics & Gynaecology,Orthopaedics,Cardio-thoracic & Vascular surgery,Paediatric surgery,Urology,Neurosurgery,Interventional Neuroradiology,Surgical Oncology,Medical Oncology,Radiation Oncology,Plastic & reconstructive,Burns management,Polytrauma,Oral and Maxillofacial Surgery,Paediatric cancer,General Medicine,Emergency Room Packages,Paediatric…	NA
Gujarat	Hybrid	Surendranagar	CHC	Public	Otorhinolaryngology,Opthalmology,Obstetrics & Gynaecology,Orthopaedics,Cardio-thoracic & Vascular surgery,Paediatric surgery,Urology,Neurosurgery,Interventional Neuroradiology,Surgical Oncology,Medical Oncology,Radiation Oncology,Plastic & reconstructive,Burns management,Polytrauma,Oral and Maxillofacial Surgery,Paediatric cancer,General Medicine,Emergency Room Packages,Paediatric medical managem…	NA
Gujarat	Hybrid	Surendranagar	CHC	Public	General Surgery,Otorhinolaryngology,Opthalmology,Obstetrics & Gynaecology,Orthopaedics,Cardio-thoracic & Vascular surgery,Paediatric surgery,Urology,Neurosurgery,Interventional Neuroradiology,Surgical Oncology,Medical Oncology,Radiation Oncology,Plastic & reconstructive,Burns management,Polytrauma,Oral and Maxillofacial Surgery,Paediatric cancer,General Medicine,Emergency Room Packages,Paediatric…	NA
Gujarat	Hybrid	Surendranagar	CHC	Public	General Surgery,Otorhinolaryngology,Opthalmology,Obstetrics & Gynaecology,Orthopaedics,Cardio-thoracic & Vascular surgery,Paediatric surgery,Urology,Neurosurgery,Interventional Neuroradiology,Surgical Oncology,Medical Oncology,Radiation Oncology,Plastic & reconstructive,Burns management,Polytrauma,Oral and Maxillofacial Surgery,Paediatric cancer,General Medicine,Emergency Room Packages,Paediatric…	-NA-
Gujarat	Hybrid	Surendranagar	CHC	Public	General Surgery,Otorhinolaryngology,Opthalmology,Obstetrics & Gynaecology,Orthopaedics,Cardio-thoracic & Vascular surgery,Paediatric surgery,Urology,Neurosurgery,Interventional Neuroradiology,Surgical Oncology,Medical Oncology,Radiation Oncology,Plastic & reconstructive,Burns management,Polytrauma,Oral and Maxillofacial Surgery,Paediatric cancer,General Medicine,Emergency Room Packages,Paediatric…	-NA-
Gujarat	Hybrid	Surendranagar	CHC	Public	Otorhinolaryngology,Opthalmology,Obstetrics & Gynaecology,Orthopaedics,Cardio-thoracic & Vascular surgery,Paediatric surgery,Urology,Neurosurgery,Interventional Neuroradiology,Surgical Oncology,Medical Oncology,Radiation Oncology,Plastic & reconstructive,Burns management,Polytrauma,Oral and Maxillofacial Surgery,Paediatric cancer,General Medicine,Emergency Room Packages,Paediatric medical managem…	-NA-
Gujarat	Hybrid	Surendranagar	PHC	Public	General Surgery,Otorhinolaryngology,Opthalmology,Obstetrics & Gynaecology,Orthopaedics,Cardio-thoracic & Vascular surgery,Paediatric surgery,Urology,Neurosurgery,Interventional Neuroradiology,Surgical Oncology,Medical Oncology,Radiation Oncology,Plastic & reconstructive,Burns management,Polytrauma,Oral and Maxillofacial Surgery,Paediatric cancer,General Medicine,Emergency Room Packages,Paediatric…	-NA-
Gujarat	Hybrid	Surendranagar	PHC	Public	General Surgery,Otorhinolaryngology,Opthalmology,Obstetrics & Gynaecology,Orthopaedics,Cardio-thoracic & Vascular surgery,Paediatric surgery,Urology,Neurosurgery,Interventional Neuroradiology,Surgical Oncology,Medical Oncology,Radiation Oncology,Plastic & reconstructive,Burns management,Polytrauma,Oral and Maxillofacial Surgery,Paediatric cancer,General Medicine,Emergency Room Packages,Paediatric…	-NA-
Gujarat	Hybrid	Surendranagar	CHC	Public	General Surgery,Otorhinolaryngology,Opthalmology,Obstetrics & Gynaecology,Orthopaedics,Cardio-thoracic & Vascular surgery,Paediatric surgery,Urology,Neurosurgery,Interventional Neuroradiology,Surgical Oncology,Medical Oncology,Radiation Oncology,Plastic & reconstructive,Burns management,Polytrauma,Oral and Maxillofacial Surgery,Paediatric cancer,General Medicine,Emergency Room Packages,Neo-natal,…	-NA-
Gujarat	Hybrid	Surendranagar	PHC	Public	General Surgery,Otorhinolaryngology,Opthalmology,Obstetrics & Gynaecology,Orthopaedics,Cardio-thoracic & Vascular surgery,Paediatric surgery,Urology,Neurosurgery,Interventional Neuroradiology,Surgical Oncology,Medical Oncology,Radiation Oncology,Plastic & reconstructive,Burns management,Polytrauma,Oral and Maxillofacial Surgery,Paediatric cancer,General Medicine,Emergency Room Packages,Paediatric…	-NA-
Gujarat	Hybrid	Surendranagar	PHC	Public	General Surgery,Otorhinolaryngology,Opthalmology,Obstetrics & Gynaecology,Orthopaedics,Cardio-thoracic & Vascular surgery,Paediatric surgery,Urology,Neurosurgery,Interventional Neuroradiology,Surgical Oncology,Medical Oncology,Radiation Oncology,Plastic & reconstructive,Burns management,Polytrauma,Oral and Maxillofacial Surgery,Paediatric cancer,General Medicine,Emergency Room Packages,Paediatric…	NA
Gujarat	Hybrid	Rajkot	CHC	Public	General Surgery,Otorhinolaryngology,Opthalmology,Obstetrics & Gynaecology,Orthopaedics,Cardio-thoracic & Vascular surgery,Paediatric surgery,Urology,Neurosurgery,Interventional Neuroradiology,Surgical Oncology,Medical Oncology,Radiation Oncology,Plastic & reconstructive,Burns management,Polytrauma,Oral and Maxillofacial Surgery,Paediatric cancer,General Medicine,Emergency Room Packages,Paediatric…	NA
Gujarat	Hybrid	Morbi	GH	Public	Otorhinolaryngology,Opthalmology,Obstetrics & Gynaecology,Cardio-thoracic & Vascular surgery,Paediatric surgery,Urology,Neurosurgery,Interventional Neuroradiology,Surgical Oncology,Medical Oncology,Radiation Oncology,Plastic & reconstructive,Burns management,Polytrauma,Oral and Maxillofacial Surgery,Paediatric cancer,General Medicine,Emergency Room Packages,Neo-natal,Cardiology,Paediatric medical…	NA
Gujarat	Hybrid	Rajkot	CHC	Public	General Surgery,Otorhinolaryngology,Opthalmology,Obstetrics & Gynaecology,Orthopaedics,Cardio-thoracic & Vascular surgery,Paediatric surgery,Urology,Neurosurgery,Interventional Neuroradiology,Surgical Oncology,Medical Oncology,Radiation Oncology,Plastic & reconstructive,Burns management,Polytrauma,Oral and Maxillofacial Surgery,Paediatric cancer,General Medicine,Emergency Room Packages,Paediatric…	-NA-
Gujarat	Hybrid	Rajkot	CHC	Public	General Surgery,Otorhinolaryngology,Opthalmology,Obstetrics & Gynaecology,Orthopaedics,Cardio-thoracic & Vascular surgery,Paediatric surgery,Urology,Neurosurgery,Interventional Neuroradiology,Surgical Oncology,Medical Oncology,Radiation Oncology,Plastic & reconstructive,Burns management,Polytrauma,Oral and Maxillofacial Surgery,Paediatric cancer,General Medicine,Emergency Room Packages,Paediatric…	-NA-
Gujarat	Hybrid	Rajkot	CHC	Public	General Surgery,Otorhinolaryngology,Opthalmology,Obstetrics & Gynaecology,Orthopaedics,Cardio-thoracic & Vascular surgery,Paediatric surgery,Urology,Neurosurgery,Interventional Neuroradiology,Surgical Oncology,Medical Oncology,Radiation Oncology,Plastic & reconstructive,Burns management,Polytrauma,Oral and Maxillofacial Surgery,Paediatric cancer,General Medicine,Emergency Room Packages,Paediatric…	-NA-
Gujarat	Hybrid	Rajkot	GH	Public	Otorhinolaryngology,Opthalmology,Obstetrics & Gynaecology,Orthopaedics,Cardio-thoracic & Vascular surgery,Paediatric surgery,Urology,Neurosurgery,Interventional Neuroradiology,Surgical Oncology,Medical Oncology,Radiation Oncology,Plastic & reconstructive,Burns management,Polytrauma,Oral and Maxillofacial Surgery,Paediatric cancer,General Medicine,Emergency Room Packages,Neo-natal,Cardiology,Paedi…	-NA-
Gujarat	Hybrid	Morbi	CHC	Public	General Surgery,Otorhinolaryngology,Opthalmology,Obstetrics & Gynaecology,Orthopaedics,Cardio-thoracic & Vascular surgery,Paediatric surgery,Urology,Neurosurgery,Interventional Neuroradiology,Surgical Oncology,Medical Oncology,Radiation Oncology,Plastic & reconstructive,Burns management,Polytrauma,Oral and Maxillofacial Surgery,Paediatric cancer,General Medicine,Emergency Room Packages,Paediatric…	-NA-
Gujarat	Hybrid	Rajkot	CHC	Public	General Surgery,Otorhinolaryngology,Opthalmology,Obstetrics & Gynaecology,Orthopaedics,Cardio-thoracic & Vascular surgery,Paediatric surgery,Urology,Neurosurgery,Interventional Neuroradiology,Surgical Oncology,Medical Oncology,Radiation Oncology,Plastic & reconstructive,Burns management,Polytrauma,Oral and Maxillofacial Surgery,Paediatric cancer,General Medicine,Emergency Room Packages,Neo-natal,…	-NA-
Gujarat	Hybrid	Rajkot	CHC	Public	General Surgery,Otorhinolaryngology,Opthalmology,Obstetrics & Gynaecology,Orthopaedics,Cardio-thoracic & Vascular surgery,Paediatric surgery,Urology,Neurosurgery,Interventional Neuroradiology,Surgical Oncology,Medical Oncology,Radiation Oncology,Plastic & reconstructive,Burns management,Polytrauma,Oral and Maxillofacial Surgery,Paediatric cancer,General Medicine,Emergency Room Packages,Paediatric…	-NA-
Gujarat	Hybrid	Rajkot	GH	Public	Otorhinolaryngology,Opthalmology,Obstetrics & Gynaecology,Orthopaedics,Cardio-thoracic & Vascular surgery,Paediatric surgery,Urology,Neurosurgery,Interventional Neuroradiology,Surgical Oncology,Medical Oncology,Radiation Oncology,Plastic & reconstructive,Burns management,Polytrauma,Oral and Maxillofacial Surgery,Paediatric cancer,General Medicine,Emergency Room Packages,Neo-natal,Cardiology,Paedi…	NA
Gujarat	Hybrid	Rajkot	CHC	Public	General Surgery,Otorhinolaryngology,Opthalmology,Obstetrics & Gynaecology,Orthopaedics,Cardio-thoracic & Vascular surgery,Paediatric surgery,Urology,Neurosurgery,Interventional Neuroradiology,Surgical Oncology,Medical Oncology,Radiation Oncology,Plastic & reconstructive,Burns management,Polytrauma,Oral and Maxillofacial Surgery,Paediatric cancer,General Medicine,Emergency Room Packages,Paediatric…	NA
Gujarat	Hybrid	Rajkot	GH	Public	Otorhinolaryngology,Opthalmology,Obstetrics & Gynaecology,Orthopaedics,Cardio-thoracic & Vascular surgery,Paediatric surgery,Urology,Neurosurgery,Interventional Neuroradiology,Surgical Oncology,Medical Oncology,Radiation Oncology,Plastic & reconstructive,Burns management,Polytrauma,Oral and Maxillofacial Surgery,Paediatric cancer,General Medicine,Emergency Room Packages,Paediatric medical managem…	NA
Gujarat	Hybrid	Rajkot	CHC	Public	General Surgery,Otorhinolaryngology,Opthalmology,Obstetrics & Gynaecology,Orthopaedics,Cardio-thoracic & Vascular surgery,Paediatric surgery,Urology,Neurosurgery,Interventional Neuroradiology,Surgical Oncology,Medical Oncology,Radiation Oncology,Plastic & reconstructive,Burns management,Polytrauma,Oral and Maxillofacial Surgery,Paediatric cancer,General Medicine,Emergency Room Packages,Paediatric…	NA
Gujarat	Hybrid	Rajkot	CHC	Public	General Surgery,Otorhinolaryngology,Opthalmology,Obstetrics & Gynaecology,Orthopaedics,Cardio-thoracic & Vascular surgery,Paediatric surgery,Urology,Neurosurgery,Interventional Neuroradiology,Surgical Oncology,Medical Oncology,Radiation Oncology,Plastic & reconstructive,Burns management,Polytrauma,Oral and Maxillofacial Surgery,Paediatric cancer,General Medicine,Emergency Room Packages,Paediatric…	NA
Gujarat	Hybrid	Morbi	SH	Public	General Surgery,Otorhinolaryngology,Opthalmology,Obstetrics & Gynaecology,Orthopaedics,Cardio-thoracic & Vascular surgery,Paediatric surgery,Urology,Neurosurgery,Interventional Neuroradiology,Surgical Oncology,Medical Oncology,Radiation Oncology,Plastic & reconstructive,Burns management,Polytrauma,Oral and Maxillofacial Surgery,Paediatric cancer,General Medicine,Emergency Room Packages,Paediatric…	NA
Gujarat	Hybrid	Morbi	CHC	Public	General Surgery,Otorhinolaryngology,Opthalmology,Obstetrics & Gynaecology,Orthopaedics,Cardio-thoracic & Vascular surgery,Paediatric surgery,Urology,Neurosurgery,Interventional Neuroradiology,Surgical Oncology,Medical Oncology,Radiation Oncology,Plastic & reconstructive,Burns management,Polytrauma,Oral and Maxillofacial Surgery,Paediatric cancer,General Medicine,Emergency Room Packages,Neo-natal,…	NA
Gujarat	Hybrid	Rajkot	CHC	Public	General Surgery,Otorhinolaryngology,Opthalmology,Obstetrics & Gynaecology,Orthopaedics,Cardio-thoracic & Vascular surgery,Paediatric surgery,Urology,Neurosurgery,Interventional Neuroradiology,Surgical Oncology,Medical Oncology,Radiation Oncology,Plastic & reconstructive,Burns management,Polytrauma,Oral and Maxillofacial Surgery,Paediatric cancer,General Medicine,Emergency Room Packages,Paediatric…	NA
Gujarat	Hybrid	Rajkot	CHC	Public	Otorhinolaryngology,Opthalmology,Obstetrics & Gynaecology,Orthopaedics,Cardio-thoracic & Vascular surgery,Paediatric surgery,Urology,Neurosurgery,Interventional Neuroradiology,Surgical Oncology,Medical Oncology,Radiation Oncology,Plastic & reconstructive,Burns management,Polytrauma,Oral and Maxillofacial Surgery,Paediatric cancer,General Medicine,Emergency Room Packages,Paediatric medical managem…	NA
Gujarat	Hybrid	Rajkot	MC	Public	Cardio-thoracic & Vascular surgery,Surgical Oncology,Radiation Oncology,Paediatric cancer,General Medicine,Emergency Room Packages,Neo-natal,Cardiology,Medical Oncology,Paediatric medical management,Mental Disorders Packages,Oral and Maxillofacial Surgery,Polytrauma,Plastic & reconstructive,Burns management,Neurosurgery,Interventional Neuroradiology,Urology,Paediatric surgery,Obstetrics & Gynaeco…	N
Gujarat	Hybrid	Morbi	CHC	Public	Otorhinolaryngology,Opthalmology,Obstetrics & Gynaecology,Orthopaedics,Cardio-thoracic & Vascular surgery,Paediatric surgery,Urology,Neurosurgery,Interventional Neuroradiology,Surgical Oncology,Medical Oncology,Radiation Oncology,Plastic & reconstructive,Burns management,Polytrauma,Oral and Maxillofacial Surgery,Paediatric cancer,General Medicine,Emergency Room Packages,Paediatric medical managem…	NA
Gujarat	Hybrid	Rajkot	SH	Public	General Surgery,Otorhinolaryngology,Opthalmology,Obstetrics & Gynaecology,Orthopaedics,Cardio-thoracic & Vascular surgery,Paediatric surgery,Urology,Neurosurgery,Interventional Neuroradiology,Surgical Oncology,Medical Oncology,Radiation Oncology,Plastic & reconstructive,Burns management,Polytrauma,Oral and Maxillofacial Surgery,Paediatric cancer,General Medicine,Emergency Room Packages,Paediatric…	NA
Gujarat	Hybrid	Jamnagar	PHC	Public	General Surgery,Otorhinolaryngology,Opthalmology,Obstetrics & Gynaecology,Orthopaedics,Cardio-thoracic & Vascular surgery,Paediatric surgery,Urology,Neurosurgery,Interventional Neuroradiology,Surgical Oncology,Medical Oncology,Radiation Oncology,Plastic & reconstructive,Burns management,Polytrauma,Oral and Maxillofacial Surgery,Paediatric cancer,General Medicine,Emergency Room Packages,Paediatric…	NA
Gujarat	Hybrid	Jamnagar	PHC	Public	General Surgery,Otorhinolaryngology,Opthalmology,Obstetrics & Gynaecology,Orthopaedics,Cardio-thoracic & Vascular surgery,Paediatric surgery,Urology,Neurosurgery,Interventional Neuroradiology,Surgical Oncology,Medical Oncology,Radiation Oncology,Plastic & reconstructive,Burns management,Polytrauma,Oral and Maxillofacial Surgery,Paediatric cancer,General Medicine,Emergency Room Packages,Neo-natal,…	NA
Gujarat	Hybrid	Jamnagar	PHC	Public	General Surgery,Otorhinolaryngology,Opthalmology,Obstetrics & Gynaecology,Orthopaedics,Cardio-thoracic & Vascular surgery,Paediatric surgery,Urology,Neurosurgery,Interventional Neuroradiology,Surgical Oncology,Medical Oncology,Radiation Oncology,Plastic & reconstructive,Burns management,Polytrauma,Oral and Maxillofacial Surgery,Paediatric cancer,General Medicine,Emergency Room Packages,Paediatric…	NA
Gujarat	Hybrid	Jamnagar	PHC	Public	General Surgery,Otorhinolaryngology,Opthalmology,Obstetrics & Gynaecology,Orthopaedics,Cardio-thoracic & Vascular surgery,Paediatric surgery,Urology,Neurosurgery,Interventional Neuroradiology,Surgical Oncology,Medical Oncology,Radiation Oncology,Plastic & reconstructive,Burns management,Polytrauma,Oral and Maxillofacial Surgery,Paediatric cancer,General Medicine,Emergency Room Packages,Paediatric…	NA
Gujarat	Hybrid	Jamnagar	PHC	Public	General Surgery,Otorhinolaryngology,Opthalmology,Obstetrics & Gynaecology,Orthopaedics,Cardio-thoracic & Vascular surgery,Paediatric surgery,Urology,Neurosurgery,Interventional Neuroradiology,Surgical Oncology,Medical Oncology,Radiation Oncology,Plastic & reconstructive,Burns management,Polytrauma,Oral and Maxillofacial Surgery,Paediatric cancer,General Medicine,Emergency Room Packages,Paediatric…	NA
Gujarat	Hybrid	Jamnagar	PHC	Public	General Surgery,Otorhinolaryngology,Opthalmology,Obstetrics & Gynaecology,Orthopaedics,Cardio-thoracic & Vascular surgery,Paediatric surgery,Urology,Neurosurgery,Interventional Neuroradiology,Surgical Oncology,Medical Oncology,Radiation Oncology,Plastic & reconstructive,Burns management,Polytrauma,Oral and Maxillofacial Surgery,Paediatric cancer,General Medicine,Emergency Room Packages,Paediatric…	NA
Gujarat	Hybrid	Jamnagar	PHC	Public	General Surgery,Otorhinolaryngology,Opthalmology,Obstetrics & Gynaecology,Orthopaedics,Cardio-thoracic & Vascular surgery,Paediatric surgery,Urology,Neurosurgery,Interventional Neuroradiology,Surgical Oncology,Medical Oncology,Radiation Oncology,Plastic & reconstructive,Burns management,Polytrauma,Oral and Maxillofacial Surgery,Paediatric cancer,General Medicine,Emergency Room Packages,Paediatric…	NA
Gujarat	Hybrid	Jamnagar	PHC	Public	General Surgery,Otorhinolaryngology,Opthalmology,Obstetrics & Gynaecology,Orthopaedics,Cardio-thoracic & Vascular surgery,Paediatric surgery,Urology,Neurosurgery,Interventional Neuroradiology,Surgical Oncology,Medical Oncology,Radiation Oncology,Plastic & reconstructive,Burns management,Polytrauma,Oral and Maxillofacial Surgery,Paediatric cancer,General Medicine,Emergency Room Packages,Paediatric…
Gujarat	Hybrid	Jamnagar	PHC	Public	General Surgery,Otorhinolaryngology,Opthalmology,Obstetrics & Gynaecology,Orthopaedics,Cardio-thoracic & Vascular surgery,Paediatric surgery,Urology,Neurosurgery,Interventional Neuroradiology,Surgical Oncology,Medical Oncology,Radiation Oncology,Plastic & reconstructive,Burns management,Polytrauma,Oral and Maxillofacial Surgery,Paediatric cancer,General Medicine,Emergency Room Packages,Paediatric…	NA
Gujarat	Hybrid	Jamnagar	PHC	Public	General Surgery,Otorhinolaryngology,Opthalmology,Obstetrics & Gynaecology,Orthopaedics,Cardio-thoracic & Vascular surgery,Paediatric surgery,Urology,Neurosurgery,Interventional Neuroradiology,Surgical Oncology,Medical Oncology,Radiation Oncology,Plastic & reconstructive,Burns management,Polytrauma,Oral and Maxillofacial Surgery,Paediatric cancer,General Medicine,Emergency Room Packages,Paediatric…	NA
[truncated: 18,258 more rows]
